# Supplementary material for: Gut Microbiota as Well as Metabolomes of Wistar Rats Recover within Two Weeks after Doripenem Antibiotic Treatment
Source: MDPI journal article supplement (doi:10.3390/microorganisms11020533), 2023-02-20
Supplement: s1 [file s1]

## Supplementary figures

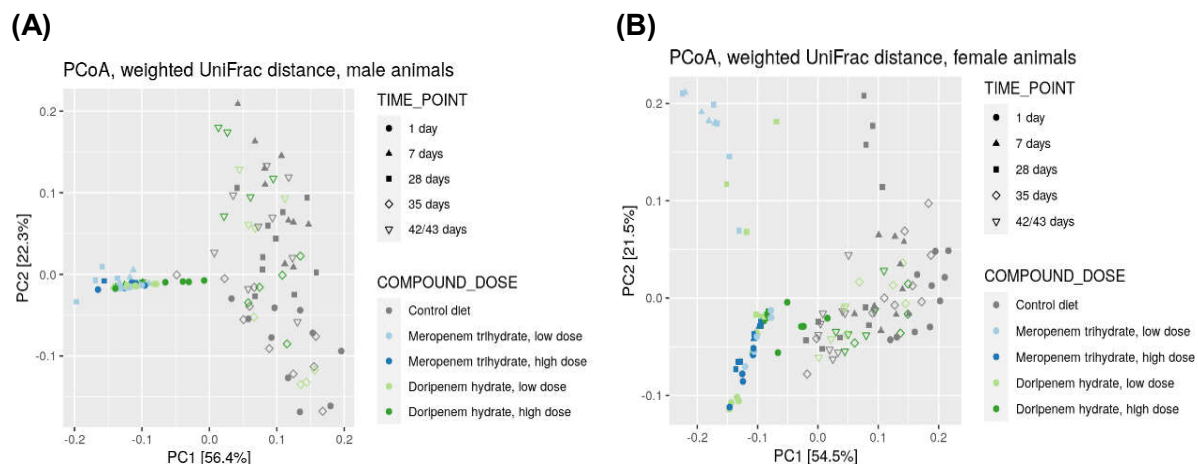

**Figure S1:** Principal Coordinate Analysis (PCoA) of bacterial families from controls, meropenem and doripenem antibiotic-treated rats at different time points using a phylogenetic-based distance matrix, weighted UniFrac distance, of samples from A) males and B) females are presented. Consistent to Bray-curtis based analysis, samples from day 1 clustered separately from the rest time points and the samples from animals treated with antibiotic from days 7 and 28 all cluster together and are separated both from controls and day 1 treated animals in both the sexes. Finally, samples from control animals at days 35 and 42/43 clustered together with the doripenem-recovery groups at one and two weeks after cessation of doripenem treatment indicating recovery reactions.

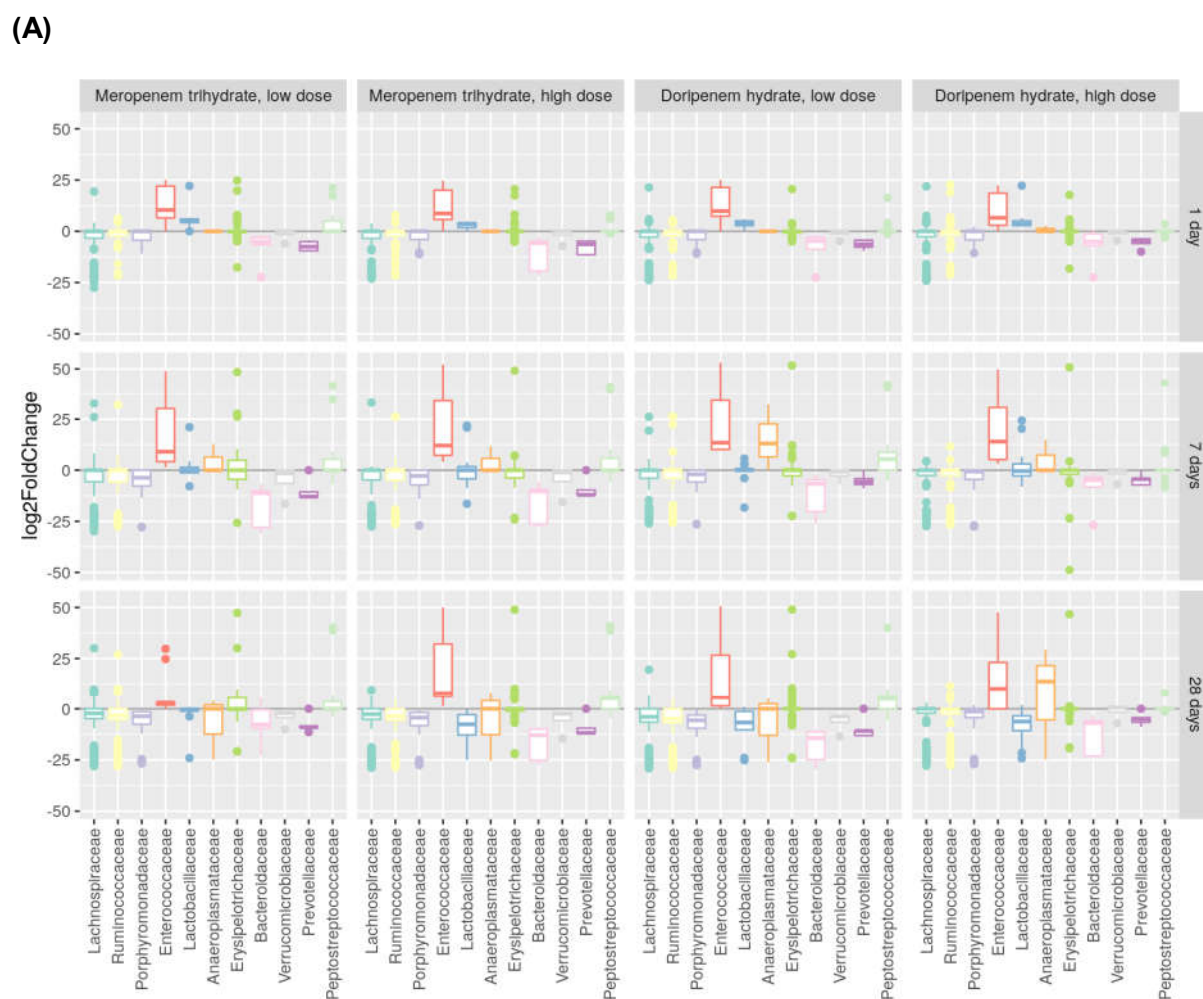

**(B)**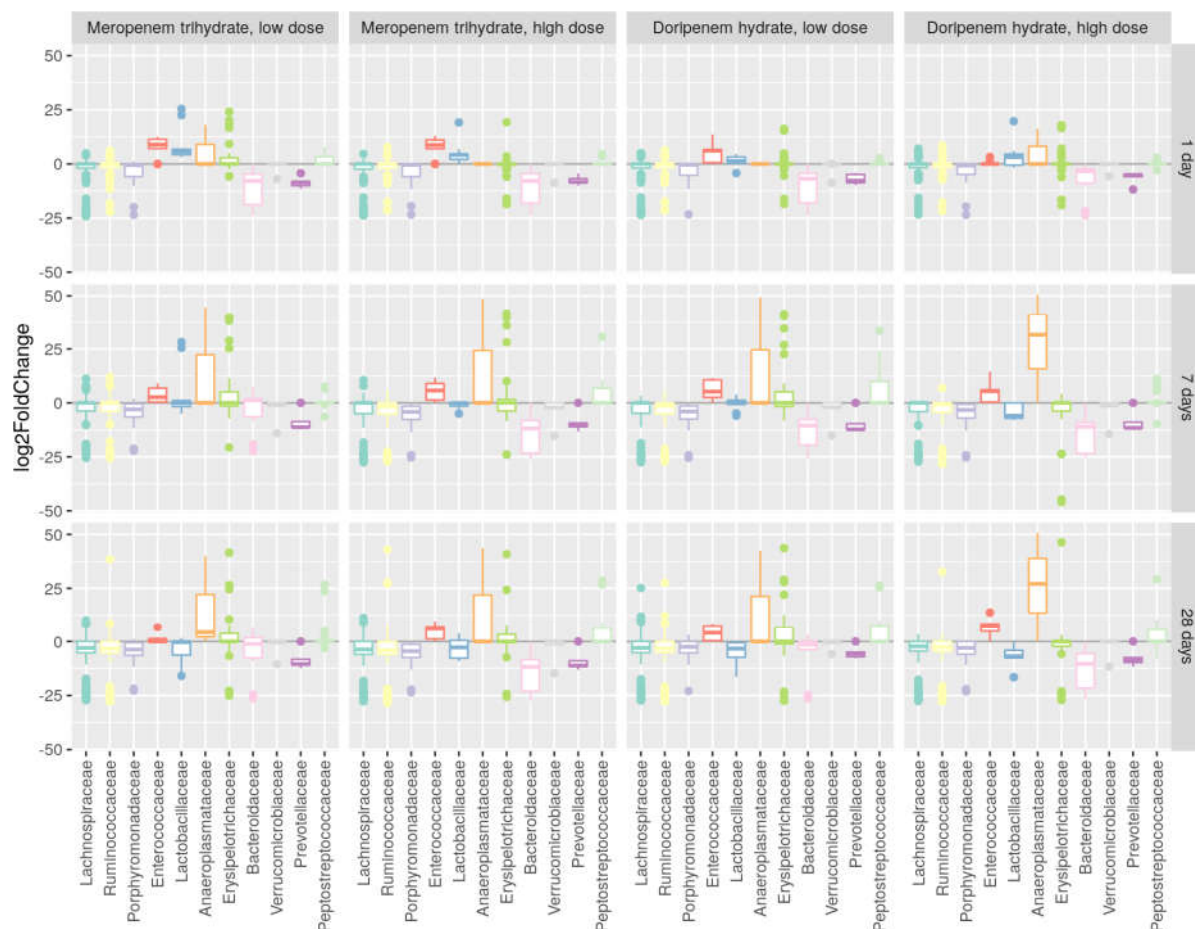

**Figure S2:** Differential abundances in dominant bacterial families in carabapenem treated samples from low (LD) and high (HD) dose groups relative to controls in males (A) and females (B). Differential abundance analysis was performed using log2FC (log2 fold change) values.

## Supplementary tables

**Table S1:** Meropenem-induced feces metabolite fold changes in female (f) Wistar rats (N=5 per group) dosed with 100 (LD) and 300 (HD) mg/kg bw/day for 7, 14 and 28 days (f7, f14 and f28). Statistically significant changes (Welch-t-test; p-value < 0.05) are shown in bold numbers where red boxes mean a significant increase in the respective fecal metabolites and yellow a significant reduction compared to control levels.

| Metabolite                           | Class                                   | Meropenem trihydrate HD |             |             | Meropenem trihydrate LD |             |             |
|--------------------------------------|-----------------------------------------|-------------------------|-------------|-------------|-------------------------|-------------|-------------|
|                                      |                                         | f7                      | f14         | f28         | f7                      | f14         | f28         |
| <b>1,2-Anhydribose</b>               | Carbohydrates and related               | <b>4.24</b>             | <b>4.94</b> | <b>5.18</b> | <b>3.20</b>             | <b>2.33</b> | 1.62        |
| <b>1,4-Hydroquinone</b>              | Miscellaneous                           | <b>2.71</b>             | <b>2.98</b> | <b>1.82</b> | <b>1.53</b>             | 1.27        | 1.09        |
| <b>14-Methylhexadecanoic acid</b>    | Complex lipids, fatty acids and related | 0.27                    | 0.36        | 0.25        | 0.73                    | 0.74        | 1.15        |
| <b>15-Methylhexadecanoic acid</b>    | Complex lipids, fatty acids and related | 0.27                    | 0.38        | 0.40        | 0.68                    | 0.81        | 1.69        |
| <b>2-Aminoadipic acid</b>            | Amino acids related                     | <b>3.92</b>             | <b>7.00</b> | <b>3.18</b> | <b>2.01</b>             | <b>3.05</b> | 1.32        |
| <b>2-Hydroxybehenic acid (C22:0)</b> | Complex lipids, fatty acids and related | 0.30                    | 0.83        | 0.55        | 0.64                    | 0.73        | <b>0.77</b> |
| <b>2-Hydroxycerotic acid (C26:0)</b> | Complex lipids, fatty acids and related | 0.38                    | 0.70        | 0.48        | 0.52                    | 0.68        | 0.60        |

|                                                       |                                         |      |      |      |       |      |      |
|-------------------------------------------------------|-----------------------------------------|------|------|------|-------|------|------|
| 2-Hydroxynervonic acid (C24:1)                        | Complex lipids, fatty acids and related | 0.24 | 0.85 | 0.53 | 0.49  | 0.95 | 0.59 |
| 2-Hydroxypentacosanoic acid (C25:0)                   | Complex lipids, fatty acids and related | 0.31 | 0.76 | 0.50 | 0.59  | 0.80 | 0.69 |
| 3-Hydroxybutyrate                                     | Energy metabolism and related           | 10.8 | 17.5 |      |       |      |      |
| 3-Hydroxyphenylacetic acid                            | Amino acids related                     | 2    | 9    | 4.55 | 4.38  | 3.45 | 2.54 |
| 4-Hydroxyphenylacetic acid                            | Amino acids related                     | 0.09 | 0.05 | 0.07 | 0.09  | 0.04 | 0.15 |
| 4-Hydroxysphinganine (t18:0, Phytosphingosine), total | Complex lipids, fatty acids and related | 20.9 | 11.7 | 10.6 |       |      |      |
| 5-O-Methylsphingosine (d18:1)                         | Complex lipids, fatty acids and related | 9    | 3    | 0    | 28.18 | 1.83 | 0.43 |
| 5-Oxoproline                                          | Amino acids related                     | 4.10 | 9.81 | 2.93 | 8.68  | 7.90 | 1.83 |
| 6-Hydroxynicotinic acid                               | Vitamins, cofactors and related         |      |      |      |       |      |      |
| Adenine                                               | Nucleobases and related                 | 1.71 | 2.65 | 2.26 | 3.15  | 2.83 | 2.53 |
| Allantoin                                             | Nucleobases and related                 | 13.6 | 22.6 |      |       | 16.2 |      |
| alpha-Amyrin TMS                                      | Unknown                                 | 8    | 9    | 5.44 | 6.91  | 4    | 4.98 |
| alpha-Tocopherol                                      | Vitamins, cofactors and related         |      |      | 10.7 |       | 14.8 | 19.6 |
| alpha-Tocopherol                                      | Unknown                                 | 8.88 | 7.56 | 9    | 7.52  | 0    | 9    |
| alpha-Tocotrienol                                     | Unknown                                 | 0.33 | 0.32 | 0.37 | 0.29  | 0.28 | 0.50 |
| Arabinose                                             | Carbohydrates and related               | 359. | 207. | 152. | 118.2 | 16.5 | 12.6 |
| Arginine                                              | Amino acids                             | 95   | 31   | 90   | 8     | 4    | 0    |
| Azelaic acid (Dicarboxylic acid; C9:0)                | Complex lipids, fatty acids and related | 0.43 | 1.13 | 0.43 | 0.46  | 0.60 | 0.65 |
| beta-/gamma-Tocotrienol                               | Unknown                                 | 0.57 | 0.66 | 0.80 | 0.97  | 0.92 | 1.18 |
| beta-Alanine                                          | Amino acids related                     | 0.07 | 0.21 | 0.07 | 0.04  | 0.07 | 0.13 |
| beta-Amyrin TMS                                       | Unknown                                 | 0.09 | 0.37 | 0.14 | 0.06  | 0.07 | 0.18 |
| beta-Muricholic acid                                  | Complex lipids, fatty acids and related | 3.46 | 2.48 | 1.62 | 2.23  | 1.92 | 5.30 |
| beta-Sitosterol, total                                | Miscellaneous                           | 1.68 | 3.24 | 2.71 | 2.85  | 2.79 | 3.22 |
| Bile acid No 05                                       | Complex lipids, fatty acids and related | 3.94 | 1.61 | 2.04 | 3.43  | 3.60 | 1.75 |
| Bile acid No 07                                       | Complex lipids, fatty acids and related | 0.63 | 0.63 | 0.95 | 0.59  | 0.55 | 1.11 |
| Biliverdin                                            | Unknown                                 |      |      |      |       |      | 18.4 |
| bis-Glycerol phosphate, polar fraction                | Miscellaneous                           | 9.72 | 5.63 | 8.30 | 25.54 | 5    | 0.71 |
| Campesterol, total                                    | Miscellaneous                           | 0.49 | 1.07 | 0.56 | 0.55  | 0.70 | 0.82 |
| Cerebronic acid (2-OH-C24:0)                          | Complex lipids, fatty acids and related | 7.76 | 3.95 | 3.66 | 16.51 | 4.56 | 2.59 |
| Cholesterol, total                                    | Complex lipids, fatty acids and related | 2.93 | 3.01 | 3.31 | 3.80  | 3.28 | 2.67 |
| Cholic acid                                           | Unknown                                 |      |      |      |       | 17.5 |      |
| Citrulline                                            | Unknown                                 | 3.08 | 2.04 | 2.34 | 8.74  | 3    | 5.40 |
| Coenzyme Q10                                          | Unknown                                 | 0.40 | 0.27 | 0.50 | 0.66  | 0.46 | 0.60 |
| Cortisol (lipid)                                      | Unknown                                 | 0.43 | 0.09 | 0.11 | 0.93  | 0.17 | 0.15 |
| Creatinine                                            | Amino acids related                     | 3.12 | 1.50 | 1.30 | 1.03  | 1.16 | 0.66 |
|                                                       |                                         | 3.00 | 2.80 | 2.94 | 3.63  | 3.60 | 2.35 |
|                                                       |                                         | 0.32 | 0.92 | 0.57 | 0.57  | 0.99 | 0.61 |
|                                                       |                                         | 3.12 | 2.15 | 2.29 | 4.83  | 2.59 | 1.34 |
|                                                       |                                         | 10.7 |      |      |       |      |      |
|                                                       |                                         | 8    | 9.57 | 7.33 | 17.48 | 1.14 | 0.91 |
|                                                       |                                         | 0.31 | 0.48 | 0.37 | 0.76  | 0.59 | 0.97 |
|                                                       |                                         | 0.55 | 0.63 | 1.05 | 0.77  | 0.82 | 0.84 |
|                                                       |                                         | 0.75 | 0.61 | 0.67 | 0.62  | 0.69 | 0.56 |
|                                                       |                                         | 113. | 146. | 115. | 111.1 | 152. | 175. |
|                                                       |                                         | 44   | 37   | 35   | 1     | 38   | 87   |

|                                      |                                         |      |      |      |       |      |      |
|--------------------------------------|-----------------------------------------|------|------|------|-------|------|------|
| Creatinine                           | Unknown                                 | 137. | 138. | 48.0 |       | 226. | 71.9 |
| Cysteine                             | Amino acids                             | 36   | 42   | 9    | 88.40 | 47   | 4    |
|                                      |                                         | 7.36 | 7.68 | 7.82 | 6.07  | 5.84 | 3.41 |
|                                      |                                         | 10.5 |      |      |       |      |      |
| Cytosine                             | Nucleobases and related                 | 9    | 5.41 | 2.67 | 4.13  | 1.64 | 1.29 |
| Dehydroalanine                       | Amino acids related                     | 8.09 | 8.74 | 5.81 | 7.21  | 5.87 | 3.55 |
|                                      | Complex lipids, fatty acids and related |      |      |      |       |      |      |
| Deoxycholic acid                     | Unknown                                 | 0.16 | 0.06 | 0.24 | 0.37  | 0.26 | 0.59 |
| Deoxycholic acid                     | Unknown                                 | 0.01 | 0.01 | 0.06 | 0.09  | 0.16 | 0.17 |
|                                      | Complex lipids, fatty acids and related |      |      |      |       |      |      |
| Eicoasenoic acid (C20:cis[11]1)      | Complex lipids, fatty acids and related | 0.77 | 0.54 | 1.50 | 0.87  | 0.69 | 1.46 |
|                                      | Complex lipids, fatty acids and related |      |      |      |       |      |      |
| Eicosadienoic acid (C20:2) No 01     | Complex lipids, fatty acids and related | 0.30 | 0.38 | 0.41 | 0.45  | 0.39 | 0.68 |
|                                      | Complex lipids, fatty acids and related |      |      |      |       |      |      |
| Eicosadienoic acid (C20:2) No 02     | Complex lipids, fatty acids and related | 0.33 | 0.40 | 0.37 | 0.40  | 0.36 | 0.38 |
| epsilon-Acetyllysine                 | Unknown                                 | 4.29 | 5.54 | 5.55 | 4.42  | 4.08 | 5.99 |
|                                      | Complex lipids, fatty acids and related |      |      |      |       |      |      |
| erythro-Dihydrosphingosine (d18:0)   | Complex lipids, fatty acids and related | 0.18 | 0.40 | 0.28 | 1.46  | 1.45 | 2.68 |
| Fucose                               | Carbohydrates and related               | 4.89 | 3.79 | 2.57 | 4.06  | 4.90 | 3.88 |
| Fucosterol, total                    | Miscellaneous                           | 2.74 | 2.16 | 2.70 | 2.46  | 2.32 | 2.41 |
|                                      | Energy metabolism and related           |      |      |      |       |      |      |
| Fumarate                             | Complex lipids, fatty acids and related | 3.79 | 6.63 | 3.60 | 2.40  | 3.74 | 2.52 |
|                                      | Complex lipids, fatty acids and related |      |      |      |       |      |      |
| Galactose, lipid fraction            | Hormones, signal substances and related | 1.48 | 1.95 | 2.46 | 2.55  | 1.39 | 1.55 |
|                                      | Hormones, signal substances and related |      |      |      |       |      |      |
| gamma-Aminobutyrate (GABA)           | Vitamins, cofactors and related         | 5.06 | 2.03 | 1.71 | 2.70  | 2.96 | 0.78 |
|                                      | Vitamins, cofactors and related         |      |      |      |       |      |      |
| gamma-Tocopherol                     | Complex lipids, fatty acids and related | 0.60 | 0.58 | 0.79 | 0.64  | 0.75 | 0.70 |
|                                      | Complex lipids, fatty acids and related |      |      |      |       |      |      |
| Glucose, lipid fraction              | Complex lipids, fatty acids and related | 1.85 | 2.25 | 2.10 | 3.37  | 1.80 | 1.12 |
| Glucose-1-phosphate                  | Carbohydrates and related               | 4.38 | 7.27 | 2.88 | 4.32  | 3.95 | 3.13 |
| Glucuronic acid                      | Carbohydrates and related               | 3.76 | 4.24 | 3.88 | 3.34  | 1.70 | 1.63 |
|                                      | Carbohydrates and related               |      | 15.7 |      |       | 12.6 |      |
| Glutamate                            | Amino acids                             | 9.24 | 5    | 5.45 | 8.64  | 3    | 4.78 |
| Glutamate                            | Unknown                                 | 1.80 | 3.30 | 1.78 | 1.92  | 2.64 | 2.05 |
| Glutamic acid 2TMS ME (lipid)        | Unknown                                 | 2.54 | 2.52 | 1.98 | 2.78  | 2.48 | 1.97 |
| Glutamine                            | Amino acids                             | 5.97 | 5.45 | 7.15 | 4.06  | 4.56 | 3.52 |
| Glutarate                            | Amino acids related                     | 0.45 | 0.47 | 0.64 | 1.44  | 0.31 | 0.66 |
|                                      | Complex lipids, fatty acids and related | 10.3 |      |      |       |      |      |
| Glycerol-3-phosphate, polar fraction | Complex lipids, fatty acids and related | 4    | 4.53 | 5.65 | 7.96  | 3.79 | 1.57 |
| Glycine, lipid fraction              | Miscellaneous                           | 0.66 | 0.67 | 0.66 | 1.58  | 1.50 | 2.18 |
| Glycine, lipid fraction              | Miscellaneous                           | 0.50 | 0.54 | 0.60 | 1.67  | 1.51 | 2.49 |
| Glycolate                            | Miscellaneous                           | 4.29 | 4.11 | 2.91 | 1.67  | 2.22 | 1.18 |
|                                      | Complex lipids, fatty acids and related |      |      |      |       |      |      |
| Heneicosanoic acid (C21:0)           | Complex lipids, fatty acids and related | 0.40 | 0.55 | 0.47 | 0.59  | 0.50 | 0.72 |
|                                      | Complex lipids, fatty acids and related |      |      |      |       |      |      |
| Heptadecanoic acid (C17:0)           | Complex lipids, fatty acids and related | 0.26 | 0.27 | 0.34 | 0.38  | 0.37 | 0.83 |
|                                      | Complex lipids, fatty acids and related |      |      |      |       |      |      |
| Hexadecanol                          | Complex lipids, fatty acids and related | 0.05 | 0.21 | 0.09 | 0.14  | 0.08 | 0.15 |
|                                      | Complex lipids, fatty acids and related |      |      |      |       |      |      |
| Hyocholic acid                       | Complex lipids, fatty acids and related | 0.81 | 0.36 | 0.28 | 0.83  | 0.33 | 0.64 |
| Hyodeoxycholic acid                  | Unknown                                 | 0.01 | 0.01 | 0.01 | 0.02  | 0.01 | 0.04 |
|                                      | Complex lipids, fatty acids and related |      |      |      |       |      |      |
| Hyodeoxycholic acid                  | Complex lipids, fatty acids and related | 0.10 | 0.05 | 0.47 | 0.14  | 0.12 | 0.59 |

|                                                         |                                         |      |      |      |       |      |      |
|---------------------------------------------------------|-----------------------------------------|------|------|------|-------|------|------|
| Indole-3-acetic acid                                    | Amino acids related                     | 11.0 |      | 10.0 |       |      |      |
| isoLCA                                                  | Unknown                                 | 9    | 3.86 | 3    | 5.12  | 3.07 | 1.38 |
| Isopalmitic acid (C16:0)                                | Complex lipids, fatty acids and related | 0.01 | 0.01 | 0.01 | 0.08  | 0.28 | 0.31 |
| Kynurenic acid                                          | Unknown                                 | 0.27 | 0.34 | 0.18 | 0.81  | 0.62 | 1.11 |
| Linoleic acid (C18:cis[9,12]2)                          | Complex lipids, fatty acids and related | 4.23 | 4.25 | 5.42 | 5.83  | 7.40 | 7.23 |
| Linolenic acid (C18:cis[9,12,15]3)                      | Complex lipids, fatty acids and related | 4.66 | 4.63 | 7.29 | 6.33  | 5.57 | 6.28 |
| Lithocholic acid                                        | Unknown                                 | 4.74 | 4.66 | 7.03 | 5.40  | 4.67 | 6.46 |
| Mannose                                                 | Carbohydrates and related               | 0.02 | 0.03 | 0.02 | 0.08  | 0.15 | 0.15 |
| Methionine                                              | Unknown                                 | 11.0 | 12.3 |      |       |      |      |
| Myristic acid (C14:0)                                   | Complex lipids, fatty acids and related | 1    | 2    | 4.63 | 12.07 | 7.01 | 0.46 |
| N2-Acetyllysine                                         | Amino acids related                     | 0.19 | 0.23 | 0.21 | 0.77  | 0.76 | 1.08 |
| N-Acetyl-aspartic acid                                  | Unknown                                 | 0.31 | 0.20 | 0.53 | 0.61  | 0.31 | 1.03 |
| N-Acetylglucosamine                                     | Unknown                                 | 4.82 | 5.67 | 4.28 | 6.23  | 3.79 | 3.62 |
| N-Acetylserine                                          | Unknown                                 | 5.94 | 4.76 | 3.34 | 1.98  | 2.37 | 2.01 |
| N-Methylglutamate                                       | Unknown                                 | 0.12 | 0.13 | 0.19 | 0.20  | 0.36 | 0.28 |
| Norleucine                                              | Miscellaneous                           |      | 11.1 |      |       |      |      |
| Octadecanol                                             | Complex lipids, fatty acids and related | 4.64 | 6    | 5.19 | 4.32  | 0.99 | 0.32 |
| Oleic acid (C18:cis[9]1)                                | Complex lipids, fatty acids and related | 0.03 | 0.05 | 0.02 | 0.06  | 0.03 | 0.07 |
| omega-Muricholic acid                                   | Complex lipids, fatty acids and related | 0.42 | 0.42 | 0.36 | 0.34  | 0.36 | 0.46 |
| o-Muricholic Acid                                       | Unknown                                 | 0.08 | 0.37 | 0.19 | 0.11  | 0.09 | 0.38 |
| Palmitic acid (C16:0)                                   | Complex lipids, fatty acids and related | 2.26 | 2.08 | 5.19 | 2.82  | 2.17 | 4.55 |
| Pentadecanol                                            | Complex lipids, fatty acids and related | 0.51 | 0.31 | 0.23 | 0.88  | 0.51 | 0.39 |
| Phosphoenolpyruvate (PEP)                               | Energy metabolism and related           | 0.19 | 0.04 | 0.03 | 0.60  | 0.12 | 0.13 |
| Pipecolic acid                                          | Unknown                                 | 0.71 | 0.48 | 1.27 | 1.16  | 0.61 | 1.38 |
| plausible 18:2-Lyso PC (Na-Addukt)                      | Unknown                                 | 0.42 | 0.45 | 0.56 | 0.54  | 0.50 | 0.90 |
| plausible 2-Hydroxyarachidic acid (2-OH-C20:0) TMS ME   | Unknown                                 | 6.07 | 6.48 | 4.24 | 3.52  | 3.75 | 3.47 |
| plausible 2-Hydroxytricosanoic acid (2-OH-C23:0) TMS ME | Unknown                                 | 0.40 | 0.23 | 0.44 | 0.74  | 0.47 | 1.00 |
| plausible Heptadecanol TMS                              | Unknown                                 | 3.02 | 1.15 | 2.62 | 2.48  | 2.98 | 1.84 |
| plausible SM (d18:1, C16:0) Na-Addukt                   | Unknown                                 | 0.25 | 0.69 | 0.50 | 0.60  | 0.70 | 0.65 |
| proposed Sphingomyelin (d18:2,C16:0)                    | Unknown                                 | 0.29 | 0.92 | 0.59 | 0.66  | 0.69 | 0.77 |
| putative 12-Methylmyristic acid TMS                     | Unknown                                 | 0.01 | 0.10 | 0.02 | 0.01  | 0.11 | 0.43 |
| putative Anhydroglucuronate 4TMS                        | Unknown                                 | 5.91 | 4.22 | 5.33 | 4.99  | 3.63 | 1.54 |
| putative beta-Muricholic acid 3TMS ME (Byprodukt)       | Unknown                                 | 4.28 | 3.34 | 4.27 | 3.43  | 2.51 | 0.98 |
| putative Bis-(glycerol)-phosphate                       | Unknown                                 | 0.02 | 0.11 | 0.04 | 0.91  | 0.91 | 1.89 |
| putative Choline plasmalogen (C36:2)                    | Unknown                                 | 3.10 | 4.24 | 2.95 | 3.47  | 4.12 | 2.82 |
| putative Deoxycholyglycine deriv #1                     | Unknown                                 | 6.13 | 2.99 | 2.10 | 13.29 | 4.16 | 2.55 |
|                                                         | Unknown                                 | 0.09 | 0.09 | 0.13 | 3.90  | 3.41 | 4.51 |
|                                                         | Unknown                                 | 6.22 | 1.49 | 2.68 | 2.97  | 1.25 | 1.59 |
|                                                         | Unknown                                 | 0.02 | 0.03 | 0.04 | 0.10  | 0.21 | 0.30 |



|                                   |                                         |      |      |      |       |      |      |
|-----------------------------------|-----------------------------------------|------|------|------|-------|------|------|
| putative Hydroxy-eicosan OTMS     | Unknown                                 | 0.17 | 0.29 | 0.40 | 0.17  | 0.17 | 0.33 |
| putative Hyodeoxycholic acid 3TMS | Unknown                                 | 0.03 | 0.06 | 0.08 | 0.03  | 0.04 | 0.11 |
| putative Lithocholic acid OTMS ME | Unknown                                 | 0.01 | 0.02 | 0.03 | 0.05  | 0.18 | 0.19 |
| putative MeOx impurity (Blank)    | Unknown                                 | 4.81 | 6.24 | 2.63 | 3.25  | 3.08 | 1.43 |
|                                   |                                         | 71.6 | 61.0 |      |       | 18.5 |      |
| Putrescine                        | Miscellaneous                           | 0    | 4    | 5.54 | 82.41 | 2    | 0.94 |
|                                   | Energy metabolism and related           |      |      |      |       |      |      |
| Pyruvate                          | Complex lipids, fatty acids and related | 2.81 | 5.66 | 3.19 | 2.37  | 2.91 | 1.65 |
|                                   |                                         |      |      |      |       |      |      |
| ribo-4-Hydroxy-8E-sphingenine     | Amino acids related                     | 0.80 | 3.04 | 1.64 | 1.42  | 2.16 | 1.77 |
| Sarcosine                         |                                         | 0.67 | 0.80 | 0.71 | 0.63  | 0.53 | 0.67 |
|                                   |                                         | 34.0 | 22.7 |      |       |      |      |
| scyllo-Inositol                   | Carbohydrates and related               | 5    | 5    | 7.73 | 5.29  | 7.42 | 1.49 |
| Serine, lipid fraction            | Miscellaneous                           | 0.62 | 0.51 | 0.71 | 1.31  | 1.32 | 2.07 |
| Serine, lipid fraction            | Miscellaneous                           | 0.69 | 0.48 | 0.63 | 1.33  | 1.37 | 2.39 |
|                                   |                                         | 1593 | 1731 |      | 1494. | 512. |      |
| Shikimic acid                     | Miscellaneous                           | .76  | .27  | 3.31 | 67    | 47   | 1.67 |
|                                   | Complex lipids, fatty acids and related |      |      |      |       |      |      |
| Stearic acid (C18:0)              |                                         | 0.68 | 0.50 | 0.66 | 0.83  | 0.56 | 0.60 |
| Stigmasterol, total               | Miscellaneous                           | 2.22 | 1.85 | 2.36 | 2.32  | 2.26 | 2.41 |
|                                   |                                         | 15.0 |      | 12.5 |       | 15.9 | 15.1 |
| Taurine                           | Unknown                                 | 0    | 9.83 | 0    | 27.07 | 5    | 9    |
| Tauro-b-muricholic Acid           | Unknown                                 | 3.51 | 2.01 | 3.42 | 2.14  | 1.30 | 1.10 |
| Taurochenodeoxycholate            | Unknown                                 | 2.08 | 1.43 | 2.60 | 1.71  | 1.56 | 1.17 |
|                                   |                                         | 185. | 197. | 280. |       | 81.4 |      |
| Taurocholic Acid 3-sulfate        | Unknown                                 | 39   | 22   | 09   | 40.98 | 9    | 6.10 |
| Taurocholic acid sodium salt      | Unknown                                 | 4.70 | 2.04 | 3.85 | 3.41  | 1.87 | 1.14 |
| Taurolithocholic Acid             | Unknown                                 | 0.04 | 0.12 | 0.15 | 0.41  | 0.61 | 0.78 |
|                                   | Complex lipids, fatty acids and related |      |      |      |       |      |      |
| Tetradecanol                      |                                         | 0.12 | 0.13 | 0.07 | 0.21  | 0.08 | 0.10 |
| Thiamine (Vitamin B1)             | Unknown                                 | 0.27 | 0.13 | 0.18 | 0.74  | 0.54 | 0.59 |
| threo-Sphinganine 3TMS            | Unknown                                 | 0.13 | 0.44 | 0.37 | 4.20  | 3.95 | 6.54 |
|                                   | Complex lipids, fatty acids and related |      |      |      |       |      |      |
| threo-Sphingosine (d18:1)         |                                         | 1.86 | 1.81 | 1.95 | 3.26  | 2.31 | 2.06 |
| trans-4-Hydroxyproline            | Amino acids related                     | 3.59 | 4.56 | 3.70 | 3.59  | 4.59 | 3.28 |
| trans-Ferulic acid                | Miscellaneous                           | 8.57 | 5.33 | 3.48 | 5.96  | 4.77 | 3.18 |
|                                   |                                         | 41.4 | 34.4 | 22.7 |       |      |      |
| trans-Sinapic acid                | Miscellaneous                           | 9    | 5    | 6    | 10.49 | 8.45 | 5.06 |
|                                   |                                         | 16.5 | 34.3 |      |       |      |      |
| Tryptophan                        | Amino acids                             | 6    | 5    | 4.70 | 3.75  | 4.53 | 2.82 |
|                                   |                                         | 26.4 | 39.2 | 12.5 |       |      |      |
| Tyramine                          | Amino acids related                     | 4    | 4    | 8    | 6.25  | 4.51 | 6.52 |
| Tyrosine                          | Unknown                                 | 0.22 | 0.24 | 0.32 | 0.65  | 0.87 | 1.05 |
| Ubichinone-30 (Coenzyme Q6)       | Unknown                                 | 0.64 | 0.66 | 0.98 | 0.95  | 0.91 | 0.81 |
| Ubichinone-35 (Coenzyme Q7)       | Unknown                                 | 0.63 | 0.74 | 0.93 | 0.89  | 0.98 | 0.83 |
| Ubichinone-45 (Coenzyme Q9)       | Unknown                                 | 0.63 | 0.70 | 0.94 | 0.91  | 0.97 | 0.84 |
| Unknown lipid MB (828450473)      | Unknown                                 | 4.29 | 4.01 | 3.13 | 3.89  | 3.12 | 2.23 |
| Unknown lipid MB (828451241)      | Unknown                                 | 0.10 | 0.13 | 0.19 | 0.30  | 0.06 | 0.60 |
| Unknown lipid MB (828451275)      | Unknown                                 | 0.79 | 0.32 | 0.30 | 0.46  | 0.36 | 0.26 |
| Unknown lipid MB (828451312)      | Unknown                                 | 0.53 | 0.31 | 0.57 | 1.72  | 0.37 | 1.04 |
| Unknown lipid MB (828451316)      | Unknown                                 | 3.45 | 1.91 | 3.20 | 4.35  | 3.08 | 1.70 |
| Unknown lipid MB (828451443)      | Unknown                                 | 0.67 | 0.58 | 1.01 | 0.98  | 0.81 | 1.09 |
| Unknown lipid MB (828451445)      | Unknown                                 | 0.24 | 0.23 | 0.36 | 0.38  | 0.33 | 0.86 |

|                                      |         |      |      |      |      |      |      |
|--------------------------------------|---------|------|------|------|------|------|------|
| Unknown lipid MB (828451931)         | Unknown | 0.00 | 0.07 | 0.04 | 0.01 | 0.10 | 0.28 |
| Unknown lipid MB (828451933)         | Unknown | 0.08 | 0.10 | 0.12 | 0.29 | 0.09 | 0.52 |
| Unknown lipid MB (828451940)         | Unknown | 0.00 | 0.34 | 0.05 | 0.01 | 0.25 | 0.24 |
| Unknown lipid MB (828452038)         | Unknown | 0.01 | 0.01 | 0.01 | 1.98 | 2.60 | 3.42 |
| Unknown lipid MB (828452040)         | Unknown | 0.12 | 0.09 | 0.32 | 1.69 | 1.59 | 2.46 |
| Unknown lipid MB (828452041)         | Unknown | 0.02 | 0.43 | 0.11 | 0.06 | 0.36 | 0.30 |
| Unknown lipid MB (828452042)         | Unknown | 0.01 | 0.02 | 0.00 | 0.01 | 0.01 | 0.01 |
| Unknown lipid MB (828452043)         | Unknown | 0.02 | 0.47 | 0.04 | 0.02 | 0.41 | 0.22 |
| Unknown lipid MB (828452047)         | Unknown | 0.01 | 0.75 | 0.09 | 0.02 | 0.46 | 0.34 |
| Unknown lipid MB (828452058)         | Unknown | 0.11 | 0.20 | 0.06 | 0.19 | 0.42 | 0.22 |
| Unknown lipid MB (828452059)         | Unknown | 0.34 | 0.18 | 0.09 | 0.62 | 0.20 | 0.40 |
| Unknown lipid MB (828452060)         | Unknown | 0.02 | 0.00 | 0.02 | 0.01 | 0.01 | 0.11 |
| Unknown lipid MB ESI neg (858450047) | Unknown | 3.31 | 1.37 | 2.96 | 1.80 | 2.05 | 2.15 |
| Unknown lipid MB ESI neg (858450065) | Unknown | 0.06 | 0.02 | 0.06 | 0.08 | 0.09 | 0.21 |
| Unknown lipid MB ESI neg (858450068) | Unknown | 0.46 | 0.80 | 0.50 | 0.47 | 0.66 | 0.49 |
| Unknown lipid MB ESI neg (858450071) | Unknown | 5.12 | 2.20 | 3.53 | 4.51 | 3.90 | 3.09 |
| Unknown lipid MB ESI pos (848450056) | Unknown | 5.71 | 2.54 | 3.79 | 3.44 | 2.89 | 3.34 |
| Unknown lipid MB ESI pos (848450067) | Unknown | 2.03 | 1.93 | 2.38 | 2.17 | 1.69 | 2.15 |
| Unknown lipid MB ESI pos (848450068) | Unknown | 3.70 | 1.43 | 2.14 | 3.69 | 2.46 | 1.78 |
| Unknown lipid MB ESI pos (848450069) | Unknown | 6.06 | 1.12 | 2.25 | 4.61 | 1.25 | 1.59 |
| Unknown lipid MB ESI pos (848450083) | Unknown | 4.73 | 2.65 | 1.80 | 3.59 | 2.41 | 0.82 |
| Unknown lipid MB ESI pos (848450084) | Unknown | 3.86 | 2.42 | 1.46 | 2.79 | 2.69 | 0.59 |
| Unknown lipid MB ESI pos (848450092) | Unknown | 0.40 | 0.17 | 0.28 | 0.55 | 1.14 | 1.27 |
| Unknown lipid MB ESI pos (848450093) | Unknown | 0.59 | 0.46 | 0.55 | 0.58 | 1.38 | 2.01 |
| Unknown lipid MB ESI pos (848450094) | Unknown | 4.11 | 6.98 | 1.61 | 1.98 | 1.51 | 1.52 |
| Unknown lipid MB ESI pos (848450095) | Unknown | 0.58 | 0.33 | 0.69 | 5.63 | 3.74 | 1.42 |
| Unknown lipid MB ESI pos (848450096) | Unknown | 3.28 | 1.25 | 2.19 | 3.50 | 11.6 | 4.24 |
| Unknown lipid MB ESI pos (848450097) | Unknown | 7.77 | 1.87 | 4.11 | 3.27 | 2.61 | 1.58 |
| Unknown lipid MB ESI pos (848450098) | Unknown | 2.55 | 1.36 | 1.39 | 1.58 | 1.43 | 1.10 |
| Unknown lipid MB ESI pos (848450100) | Unknown | 3.36 | 1.06 | 2.00 | 4.77 | 2.56 | 1.48 |
| Unknown lipid MB ESI pos (848450102) | Unknown | 4.87 | 1.46 | 2.40 | 2.31 | 1.74 | 1.63 |
| Unknown lipid MB ESI pos (848450103) | Unknown | 4.91 | 1.90 | 3.72 | 2.68 | 1.61 | 1.24 |
| Unknown lipid MB ESI pos (848450105) | Unknown | 9.05 | 2.88 | 9.13 | 4.19 | 4.61 | 1.57 |
| Unknown lipid MB ESI pos (848450106) | Unknown | 8.23 | 2.10 | 3.00 | 5.64 | 2.42 | 0.81 |

|                                         |         |      |      |      |      |      |      |
|-----------------------------------------|---------|------|------|------|------|------|------|
| Unknown lipid MB ESI pos<br>(848450107) | Unknown | 2.97 | 1.15 | 2.19 | 2.62 | 1.79 | 2.02 |
| Unknown lipid MB ESI pos<br>(848450108) | Unknown | 5.37 | 1.55 | 3.81 | 4.27 | 2.62 | 3.26 |
| Unknown lipid MB ESI pos<br>(848450109) | Unknown | 5.39 | 1.56 | 3.09 | 3.97 | 1.80 | 1.53 |
| Unknown lipid MB ESI pos<br>(848450110) | Unknown | 9.35 | 4.25 | 3.91 | 7.78 | 2.35 | 0.97 |
| Unknown lipid MB ESI pos<br>(848450111) | Unknown | 3.86 | 2.78 | 3.17 | 4.81 | 3.87 | 3.66 |
| Unknown lipid MB ESI pos<br>(848450112) | Unknown | 3.97 | 1.17 | 2.89 | 3.92 | 1.54 | 2.70 |
| Unknown lipid MB ESI pos<br>(848450113) | Unknown | 7.26 | 3.23 | 6.76 | 6.65 | 4.53 | 6.23 |
| Unknown lipid MB ESI pos<br>(848450114) | Unknown | 7.35 | 1.68 | 3.87 | 4.93 | 2.45 | 2.20 |
| Unknown lipid MB ESI pos<br>(848450115) | Unknown | 4.08 | 1.26 | 2.63 | 2.89 | 1.01 | 0.98 |
| Unknown lipid MB ESI pos<br>(848450116) | Unknown | 5.77 | 2.74 | 2.07 | 4.00 | 2.50 | 0.77 |
| Unknown lipid MB ESI pos<br>(848450120) | Unknown | 3.94 | 1.19 | 3.12 | 2.49 | 1.37 | 1.27 |
| Unknown lipid MB ESI pos<br>(848450123) | Unknown | 3.05 | 1.30 | 2.51 | 3.35 | 3.15 | 0.97 |
| Unknown lipid MB ESI pos<br>(848450129) | Unknown | 3.67 | 2.43 | 2.87 | 4.01 | 2.35 | 0.90 |
| Unknown lipid MB ESI pos<br>(848450130) | Unknown | 3.12 | 1.80 | 1.89 | 3.33 | 1.34 | 0.87 |
| Unknown lipid MB ESI pos<br>(848450131) | Unknown | 6.11 | 3.39 | 4.21 | 6.06 | 3.02 | 1.17 |
| Unknown lipid MB ESI pos<br>(848450132) | Unknown | 5.87 | 3.53 | 3.49 | 5.40 | 3.43 | 0.91 |
| Unknown lipid MB ESI pos<br>(848450133) | Unknown | 3.47 | 2.03 | 1.57 | 3.34 | 1.74 | 0.63 |
| Unknown lipid MB ESI pos<br>(848450135) | Unknown | 3.71 | 1.73 | 1.90 | 3.37 | 1.97 | 1.15 |
| Unknown lipid MB ESI pos<br>(848450138) | Unknown | 4.33 | 3.67 | 2.59 | 4.52 | 3.04 | 0.79 |
| Unknown lipid MB ESI pos<br>(848450144) | Unknown | 3.91 | 3.68 | 1.96 | 3.71 | 3.00 | 1.18 |
| Unknown lipid MB ESI pos<br>(848450146) | Unknown | 3.42 | 4.32 | 2.27 | 2.81 | 3.83 | 1.18 |
| Unknown lipid MB ESI pos<br>(848450147) | Unknown | 1.42 | 2.50 | 1.79 | 1.96 | 1.94 | 1.23 |
| Unknown lipid MB ESI pos<br>(848450148) | Unknown | 3.74 | 5.67 | 3.07 | 4.58 | 4.31 | 1.31 |
| Unknown lipid MB ESI pos<br>(848450152) | Unknown | 3.08 | 2.74 | 1.83 | 3.03 | 2.29 | 1.08 |
| Unknown lipid MB ESI pos<br>(848450153) | Unknown | 2.24 | 3.00 | 1.31 | 2.35 | 1.69 | 1.12 |
| Unknown lipid MB ESI pos<br>(848450156) | Unknown | 1.41 | 2.78 | 0.86 | 2.37 | 1.81 | 1.18 |
| Unknown lipid MB ESI pos<br>(848450158) | Unknown | 2.26 | 3.46 | 1.37 | 4.46 | 2.40 | 1.44 |
| Unknown lipid MB ESI pos<br>(848450161) | Unknown | 1.58 | 4.77 | 1.71 | 2.75 | 3.00 | 2.71 |
| Unknown lipid MB ESI pos<br>(848450162) | Unknown | 1.74 | 3.79 | 1.54 | 2.49 | 2.95 | 1.66 |



|                                      |         |      |      |      |       |      |      |
|--------------------------------------|---------|------|------|------|-------|------|------|
| Unknown lipid MB ESI pos (848450163) | Unknown | 1.93 | 4.61 | 2.15 | 3.16  | 3.66 | 2.83 |
| Unknown lipid MB ESI pos (848450168) | Unknown | 1.67 | 2.89 | 1.64 | 2.78  | 2.18 | 1.44 |
| Unknown lipid MB ESI pos (848450169) | Unknown | 1.72 | 7.09 | 2.14 | 2.69  | 3.86 | 1.79 |
| Unknown lipid MB ESI pos (848450196) | Unknown | 12.3 | 14.9 |      |       | 15.0 | 11.8 |
| Unknown lipid MB ESI pos (848450201) | Unknown | 1    | 0    | 9.85 | 13.22 | 2    | 0    |
| Unknown lipid MB ESI pos (848450202) | Unknown |      | 11.5 |      |       | 15.9 | 10.0 |
| Unknown lipid MB ESI pos (848450204) | Unknown | 9.34 | 2    | 8.56 | 10.29 | 8    | 8    |
| Unknown lipid MB ESI pos (848450205) | Unknown | 4.65 | 4.08 | 4.76 | 4.08  | 4.94 | 4.85 |
| Unknown lipid MB ESI pos (848450206) | Unknown | 12.2 | 16.3 |      |       | 20.9 | 12.0 |
| Unknown lipid MB ESI pos (848450207) | Unknown | 1    | 5    | 9.62 | 14.19 | 6    | 3    |
| Unknown lipid MB ESI pos (848450208) | Unknown | 12.8 | 10.0 |      |       | 13.1 |      |
| Unknown lipid MB ESI pos (848450209) | Unknown | 4    | 8    | 8.98 | 12.46 | 1    | 9.57 |
| Unknown lipid MB ESI pos (848450210) | Unknown | 14.6 | 25.6 | 13.6 |       | 32.0 | 16.1 |
| Unknown lipid MB ESI pos (848450211) | Unknown | 4    | 9    | 6    | 15.27 | 2    | 4    |
| Unknown lipid MB ESI pos (848450212) | Unknown | 11.7 | 18.3 | 13.6 |       | 27.2 | 15.8 |
| Unknown lipid MB ESI pos (848450213) | Unknown | 7    | 0    | 4    | 14.06 | 7    | 3    |
| Unknown lipid MB ESI pos (848450214) | Unknown | 11.8 | 16.8 | 10.6 |       | 21.1 | 11.8 |
| Unknown lipid MB ESI pos (848450215) | Unknown | 9    | 8    | 1    | 13.06 | 4    | 6    |
| Unknown lipid MB ESI pos (848450216) | Unknown | 8.33 | 8.18 | 7.42 | 8.39  | 9.53 | 7.81 |
| Unknown lipid MB ESI pos (848450217) | Unknown | 11.0 |      |      |       | 14.9 | 11.0 |
| Unknown lipid MB ESI pos (848450218) | Unknown | 8    | 9.66 | 8.96 | 11.52 | 2    | 2    |
| Unknown lipid MB ESI pos (848450219) | Unknown |      | 13.1 |      |       | 13.9 |      |
| Unknown lipid MB ESI pos (848450220) | Unknown | 8.77 | 6    | 7.48 | 8.72  | 6    | 8.21 |
| Unknown lipid MB ESI pos (848450221) | Unknown | 11.3 | 13.3 |      |       | 14.6 | 10.3 |
| Unknown lipid MB ESI pos (848450222) | Unknown | 9    | 8    | 9.43 | 12.40 | 8    | 1    |
| Unknown lipid MB ESI pos (848450223) | Unknown |      | 14.5 |      |       | 15.6 |      |
| Unknown lipid MB ESI pos (848450224) | Unknown | 9.59 | 1    | 8.75 | 9.71  | 4    | 9.34 |
| Unknown lipid MB ESI pos (848450225) | Unknown | 12.1 | 15.8 |      |       | 23.1 | 11.2 |
| Unknown lipid MB ESI pos (848450226) | Unknown | 4    | 4    | 9.73 | 10.82 | 9    | 8    |
| Unknown lipid MB ESI pos (848450227) | Unknown |      | 10.0 |      |       | 11.7 |      |
| Unknown lipid MB ESI pos (848450228) | Unknown | 9.81 | 3    | 8.72 | 10.48 | 2    | 9.69 |
| Unknown lipid MB ESI pos (848450229) | Unknown | 12.4 | 13.7 | 10.7 |       | 16.2 | 11.5 |
| Unknown lipid MB ESI pos (848450230) | Unknown | 7    | 5    | 4    | 11.05 | 6    | 2    |
| Unknown lipid MB ESI pos (848450231) | Unknown |      | 11.0 |      |       | 15.0 | 10.8 |
| Unknown lipid MB ESI pos (848450232) | Unknown | 9.37 | 2    | 9.02 | 9.62  | 8    | 5    |
| Unknown polar MB (838450146)         | Unknown | 4.27 | 5.06 | 2.68 | 1.89  | 1.47 | 1.63 |
| Unknown polar MB (838450618)         | Unknown | 3.08 | 2.01 | 2.39 | 2.73  | 1.37 | 1.18 |
| Unknown polar MB (838450621)         | Unknown | 12.1 | 10.7 |      |       |      |      |
| Unknown polar MB (838450621)         | Unknown | 3    | 5    | 4.98 | 9.43  | 3.59 | 0.92 |
| Unknown polar MB (838450692)         | Unknown | 0.12 | 0.25 | 0.12 | 0.18  | 0.13 | 0.16 |
| Unknown polar MB (838450761)         | Unknown | 2.55 | 1.44 | 2.39 | 3.93  | 2.15 | 1.36 |
| Unknown polar MB (838450807)         | Unknown | 2.74 | 1.76 | 1.89 | 1.89  | 2.42 | 2.33 |
| Unknown polar MB (838450816)         | Unknown | 0.01 | 0.01 | 0.00 | 0.01  | 0.00 | 0.01 |
| Unknown polar MB (838451614)         | Unknown | 0.01 | 0.02 | 0.02 | 0.02  | 0.01 | 0.03 |
| Unknown polar MB (838451982)         | Unknown | 8.38 | 3.67 | 5.01 | 6.72  | 3.44 | 1.85 |
| Unknown polar MB (838452021)         | Unknown | 0.42 | 0.39 | 0.63 | 0.58  | 0.40 | 0.60 |
| Unknown polar MB (838452022)         | Unknown | 2.48 | 3.56 | 2.14 | 2.12  | 1.85 | 1.49 |
| Unknown polar MB (838452079)         | Unknown | 3.91 | 3.37 | 2.35 | 2.95  | 2.23 | 3.63 |
| Unknown polar MB (838452178)         | Unknown | 0.12 | 0.17 | 0.59 | 0.28  | 0.21 | 1.07 |
| Unknown polar MB (838452196)         | Unknown | 2.80 | 3.25 | 2.06 | 1.73  | 1.74 | 1.60 |

|                                      |                         |        |        |        |        |        |       |
|--------------------------------------|-------------------------|--------|--------|--------|--------|--------|-------|
| Unknown polar MB (838452482)         | Unknown                 | 313.21 | 115.05 | 253.60 | 156.16 | 16.64  | 15.63 |
| Unknown polar MB (838452999)         | Unknown                 | 53.93  | 56.90  | 37.37  |        | 20.15  | 4.97  |
| Unknown polar MB (838453000)         | Unknown                 | 7.71   | 3.49   | 4.13   | 4.07   | 2.52   | 2.01  |
| Unknown polar MB (838453005)         | Unknown                 | 0.18   | 0.22   | 0.27   | 0.64   | 0.37   | 1.02  |
| Unknown polar MB (838453006)         | Unknown                 | 0.38   | 0.35   | 0.48   | 0.30   | 0.14   | 0.24  |
| Unknown polar MB (838453007)         | Unknown                 | 0.19   | 0.21   | 0.12   | 0.21   | 0.09   | 0.21  |
| Unknown polar MB (838453009)         | Unknown                 | 0.03   | 0.05   | 0.02   | 0.01   | 0.04   | 0.02  |
| Unknown polar MB (838453011)         | Unknown                 | 0.87   | 0.40   | 0.26   | 0.63   | 0.17   | 0.35  |
| Unknown polar MB (838453012)         | Unknown                 | 187.01 | 293.71 | 97.92  | 164.94 | 136.84 | 55.31 |
| Unknown polar MB (838453015)         | Unknown                 | 0.20   | 0.20   | 0.35   | 0.27   | 0.15   | 0.80  |
| Unknown polar MB (838453017)         | Unknown                 | 0.07   | 0.19   | 0.07   | 0.14   | 0.08   | 0.17  |
| Unknown polar MB (838453018)         | Unknown                 | 0.10   | 0.20   | 0.12   | 0.18   | 0.10   | 0.34  |
| Unknown polar MB (838453019)         | Unknown                 | 0.06   | 0.08   | 0.02   | 0.03   | 0.06   | 0.10  |
| Unknown polar MB (838453026)         | Unknown                 | 0.23   | 0.14   | 0.14   | 0.14   | 0.04   | 0.09  |
| Unknown polar MB (838453028)         | Unknown                 | 0.08   | 0.08   | 0.06   | 0.07   | 0.08   | 0.04  |
| Unknown polar MB (838453029)         | Unknown                 | 0.08   | 0.11   | 0.13   | 0.09   | 0.11   | 0.35  |
| Unknown polar MB (838453030)         | Unknown                 | 0.17   | 0.18   | 0.15   | 0.15   | 0.05   | 0.09  |
| Unknown polar MB (838453031)         | Unknown                 | 0.01   | 0.02   | 0.01   | 0.01   | 0.01   | 0.01  |
| Unknown polar MB (838453033)         | Unknown                 | 0.06   | 0.07   | 0.06   | 0.09   | 0.05   | 0.10  |
| Unknown polar MB (838453035)         | Unknown                 | 0.08   | 0.03   | 0.01   | 0.05   | 0.03   | 0.02  |
| Unknown polar MB (838453036)         | Unknown                 | 0.09   | 0.12   | 0.03   | 0.13   | 0.09   | 0.04  |
| Unknown polar MB (838453039)         | Unknown                 | 0.08   | 0.05   | 0.09   | 0.08   | 0.12   | 0.56  |
| Unknown polar MB (838453040)         | Unknown                 | 0.05   | 0.08   | 0.31   | 0.09   | 0.23   | 1.11  |
| Unknown polar MB (838453041)         | Unknown                 | 0.18   | 0.21   | 0.33   | 0.19   | 0.25   | 0.57  |
| Unknown polar MB (838453043)         | Unknown                 | 0.07   | 0.06   | 0.04   | 0.10   | 0.05   | 0.05  |
| Unknown polar MB (838453044)         | Unknown                 | 0.31   | 0.28   | 0.77   | 0.62   | 0.65   | 1.09  |
| Unknown polar MB (838453051)         | Unknown                 | 0.42   | 0.24   | 0.63   | 0.65   | 0.57   | 0.78  |
| Unknown polar MB (838453052)         | Unknown                 | 0.21   | 0.12   | 0.26   | 0.28   | 0.21   | 0.42  |
| Unknown polar MB (838453053)         | Unknown                 | 0.19   | 0.19   | 0.31   | 0.47   | 0.48   | 0.76  |
| Unknown polar MB (838453056)         | Unknown                 | 0.31   | 0.15   | 0.34   | 0.44   | 0.36   | 0.53  |
| Unknown polar MB (838453057)         | Unknown                 | 0.17   | 0.12   | 0.28   | 0.28   | 0.22   | 0.34  |
| Unknown polar MB (838453058)         | Unknown                 | 0.65   | 0.07   | 0.10   | 1.55   | 0.19   | 0.38  |
| Unknown polar MB (838453059)         | Unknown                 | 2.95   | 1.43   | 2.87   | 3.57   | 2.14   | 2.23  |
| Unknown polar MB (838453062)         | Unknown                 | 0.50   | 0.42   | 0.66   | 0.76   | 0.66   | 0.80  |
| Unknown polar MB (838453063)         | Unknown                 | 0.60   | 0.08   | 0.12   | 1.18   | 0.24   | 0.28  |
| Unknown polar MB (838453064)         | Unknown                 | 0.14   | 0.09   | 0.17   | 0.39   | 0.19   | 0.30  |
| Unknown polar MB (838453066)         | Unknown                 | 0.01   | 0.01   | 0.02   | 0.01   | 0.03   | 0.82  |
| Unknown polar MB (838453067)         | Unknown                 | 3.04   | 3.71   | 2.18   | 1.54   | 1.60   | 2.21  |
| Unknown polar MB ESI neg (878450071) | Unknown                 | 4.03   | 1.87   | 2.36   | 3.69   | 3.05   | 2.52  |
| Unknown polar MB ESI pos (868450018) | Unknown                 | 0.20   | 0.19   | 0.40   | 0.27   | 0.16   | 0.63  |
| Unknown polar MB ESI pos (868450034) | Unknown                 | 0.34   | 0.37   | 0.72   | 0.39   | 0.39   | 0.63  |
| Uracil                               | Nucleobases and related | 0.17   | 0.29   | 0.24   | 0.30   | 0.32   | 0.34  |
| Xanthurenic acid                     | Amino acids related     | 0.07   | 0.12   | 0.16   | 0.13   | 0.10   | 0.12  |

**Table S2:** Meropenem-induced feces metabolite fold changes in male (m) Wistar rats (N=5 per group) dosed with 100 (LD) and 300 (HD) mg/kg bw/day for 7, 14 and 28 days (m7, m14 and m28). Statistically significant changes (Welch-t-test; p-value < 0.05) are shown in bold numbers where red boxes mean a significant increase in the respective fecal metabolites and yellow a significant reduction compared to control levels.

| Metabolite                                            | Class                                   | Meropenem trihydrate HD |      |      | Meropenem trihydrate LD |      |      |
|-------------------------------------------------------|-----------------------------------------|-------------------------|------|------|-------------------------|------|------|
|                                                       |                                         | m7                      | m14  | m28  | m7                      | m14  | m28  |
| 1,25-Dihydroxy-vitamin D3                             | Unknown                                 | 0.87                    | 0.52 | 0.61 | 0.80                    | 0.88 | 0.92 |
| 1,2-Anhydribose                                       | Carbohydrates and related               | 4.14                    | 5.01 | 5.10 | 4.93                    | 4.12 | 3.49 |
| 1,4-Hydroquinone                                      | Miscellaneous                           | 2.89                    | 3.03 | 2.05 | 1.57                    | 1.39 | 1.26 |
| 14-Methylhexadecanoic acid                            | Complex lipids, fatty acids and related | 0.33                    | 0.25 | 0.35 | 0.65                    | 0.65 | 1.06 |
| 15-Methylhexadecanoic acid                            | Complex lipids, fatty acids and related | 0.32                    | 0.28 | 0.36 | 0.39                    | 0.51 | 0.69 |
| 2-Hydroxybehenic acid (C22:0)                         | Complex lipids, fatty acids and related | 0.42                    | 0.38 | 0.50 | 0.55                    | 0.71 | 0.98 |
| 2-Hydroxycerotic acid (C26:0)                         | Complex lipids, fatty acids and related | 0.36                    | 0.36 | 0.54 | 0.46                    | 0.62 | 0.84 |
| 2-Hydroxynervonic acid (C24:1)                        | Complex lipids, fatty acids and related | 0.35                    | 0.37 | 0.47 | 0.45                    | 0.72 | 0.91 |
| 2-Hydroxypalmitic acid (C16:0)                        | Complex lipids, fatty acids and related | 0.54                    | 0.41 | 0.56 | 0.67                    | 0.71 | 0.82 |
| 2-Hydroxypentacosanoic acid (C25:0)                   | Complex lipids, fatty acids and related | 0.39                    | 0.40 | 0.45 | 0.51                    | 0.59 | 0.73 |
| 2-Methylserine                                        | Unknown                                 | 0.46                    | 0.50 | 0.69 | 1.08                    | 1.85 | 1.40 |
| 3-Hydroxybutyrate                                     | Energy metabolism and related           | 7.52                    | 14.7 | 8.54 | 4.14                    | 7.90 | 3.21 |
| 3-Hydroxyphenylacetic acid                            | Amino acids related                     | 0.09                    | 0.13 | 0.06 | 0.05                    | 0.06 | 0.03 |
| 4-Hydroxyphenylacetic acid                            | Amino acids related                     | 33.7                    | 13.9 | 5.58 | 24.99                   | 4.27 | 4.17 |
| 4-Hydroxysphinganine (t18:0, Phytosphingosine), total | Complex lipids, fatty acids and related | 4.25                    | 3.63 | 3.08 | 6.77                    | 5.97 | 2.68 |
| 5-Oxoproline                                          | Amino acids related                     | 13.9                    | 16.4 | 19.0 | 11.9                    | 5    | 9.98 |
| 5-Oxoproline, lipid fraction                          | Miscellaneous                           | 6                       | 4    | 0    | 10.82                   | 1.48 | 2.44 |
| 6-Hydroxynicotinic acid                               | Vitamins, cofactors and related         | 1.79                    | 1.27 | 1.70 | 1.60                    | 14.8 | 20.7 |
| Adenine                                               | Nucleobases and related                 | 5.81                    | 6.57 | 7.39 | 7.42                    | 4    | 7    |
| Allantoin                                             | Nucleobases and related                 | 0.20                    | 0.29 | 0.38 | 0.26                    | 0.25 | 0.37 |
| alpha-Tocopherol                                      | Vitamins, cofactors and related         | 239.                    | 134. | 291. | 373.3                   | 23.5 | 63.3 |
| alpha-Tocopherol                                      | Unknown                                 | 76                      | 81   | 73   | 4                       | 0    | 2    |
| alpha-Tocotrienol                                     | Unknown                                 | 0.39                    | 0.54 | 0.80 | 0.56                    | 0.77 | 1.42 |
| a-Muricholic Acid                                     | Unknown                                 | 0.04                    | 0.11 | 0.14 | 0.05                    | 0.19 | 0.43 |
| Arabinose                                             | Carbohydrates and related               | 0.07                    | 0.22 | 0.20 | 0.08                    | 0.49 | 0.58 |
| Arginine                                              | Amino acids                             | 23.8                    | 2.53 | 2.28 | 18.70                   | 5.85 | 2.13 |
| Azelaic acid (Dicarboxylic acid; C9:0)                | Complex lipids, fatty acids and related | 8                       | 2.87 | 2.39 | 2.51                    | 4.44 | 4.28 |
| Behenic acid (C22:0)                                  | Complex lipids, fatty acids and related | 2.00                    | 1.78 | 2.48 | 3.48                    | 5.21 | 3.18 |
| beta-/gamma-Tocotrienol                               | Unknown                                 | 3.81                    | 2.12 | 2.59 | 2.03                    | 1.99 | 1.34 |
| beta-/gamma-Tocotrienol                               | Unknown                                 | 2.12                    | 2.59 | 2.03 | 1.99                    | 1.34 | 1.66 |
|                                                       |                                         | 0.63                    | 0.66 | 0.70 | 0.83                    | 0.87 | 0.96 |
|                                                       |                                         | 0.48                    | 0.61 | 0.82 | 0.53                    | 0.80 | 1.28 |
|                                                       |                                         | 0.51                    | 0.53 | 0.81 | 0.51                    | 0.64 | 1.20 |

|                                             |                                         |      |      |      |       |      |      |      |      |
|---------------------------------------------|-----------------------------------------|------|------|------|-------|------|------|------|------|
| beta-Alanine                                | Amino acids related                     | 18.7 |      |      |       |      |      | 10.8 | 31.3 |
|                                             |                                         | 4.59 | 4.80 | 6    | 19.75 | 8    | 1    |      |      |
| beta-Muricholic acid                        | Complex lipids, fatty acids and related | 38.7 |      | 13.2 |       |      |      |      | 15.9 |
|                                             |                                         | 9    | 8.83 | 5    | 23.11 | 3.08 | 2    |      |      |
| beta-Sitosterol, total                      | Miscellaneous                           | 3.22 | 3.78 | 3.30 | 3.13  | 3.78 | 2.08 |      |      |
|                                             |                                         | 23.0 |      |      |       |      |      |      |      |
| Bile acid No 01                             | Complex lipids, fatty acids and related | 7    | 2.97 | 4.41 | 16.88 | 2.88 | 4.34 |      |      |
| Biliverdin                                  | Unknown                                 | 0.16 | 0.08 | 0.21 | 0.38  | 0.13 | 0.22 |      |      |
| bis-Glyceryl phosphate, polar fraction      | Miscellaneous                           | 3.48 | 4.54 | 2.00 | 2.40  | 1.82 | 1.34 |      |      |
| b-Muricholic Acid                           | Unknown                                 | 8.16 | 2.43 | 2.13 | 5.03  | 1.73 | 3.48 |      |      |
| Campesterol, total                          | Miscellaneous                           | 3.15 | 3.33 | 2.91 | 3.04  | 3.20 | 1.85 |      |      |
| Catechol                                    | Miscellaneous                           | 1.09 | 0.53 | 0.39 | 0.92  | 0.67 | 1.06 |      |      |
| Cerebronic acid (2-OH-C24:0)                | Complex lipids, fatty acids and related |      |      |      |       |      |      |      |      |
|                                             |                                         | 0.44 | 0.41 | 0.54 | 0.57  | 0.72 | 0.86 |      |      |
| Cholesterol, total                          | Complex lipids, fatty acids and related | 2.65 | 3.03 | 2.36 | 3.15  | 3.64 | 1.26 |      |      |
|                                             |                                         | 13.7 | 22.7 | 33.7 |       |      |      |      |      |
| Cholic acid                                 | Unknown                                 | 8    | 5    | 8    | 4.61  | 5.80 | 7.61 |      |      |
| Coenzyme Q10                                | Unknown                                 | 0.66 | 0.40 | 0.55 | 0.69  | 0.71 | 0.93 |      |      |
| conjugated Linoleic acid (C18:trans[9,11]2) | Complex lipids, fatty acids and related |      |      |      |       |      |      |      |      |
|                                             |                                         | 0.38 | 0.50 | 0.67 | 0.64  | 0.62 | 1.23 |      |      |
| Cortisol (lipid)                            | Unknown                                 | 0.51 | 0.49 | 0.51 | 0.60  | 0.62 | 0.66 |      |      |
| Creatinine                                  | Amino acids related                     | 102. | 101. | 103. | 104.4 | 84.8 | 123. |      |      |
|                                             |                                         | 63   | 53   | 74   | 9     | 0    | 58   |      |      |
| Creatinine                                  | Unknown                                 | 280. | 184. | 228. | 151.1 | 213. | 338. |      |      |
|                                             |                                         | 14   | 57   | 47   | 0     | 64   | 16   |      |      |
| Cysteine                                    | Amino acids                             | 6.54 | 8.76 | 6.74 | 7.44  | 7.34 | 8.67 |      |      |
| Cytosine                                    | Nucleobases and related                 | 3.38 | 6.81 | 4.32 | 2.18  | 1.62 | 1.52 |      |      |
| Dehydroalanine                              | Amino acids related                     | 7.23 | 7.84 | 5.47 | 7.48  | 5.68 | 4.24 |      |      |
| Deoxycholic acid                            | Complex lipids, fatty acids and related |      |      |      |       |      |      |      |      |
|                                             |                                         | 0.13 | 0.20 | 0.17 | 0.47  | 0.67 | 0.44 |      |      |
| Deoxycholic acid                            | Unknown                                 | 0.01 | 0.01 | 0.00 | 0.20  | 0.21 | 0.24 |      |      |
|                                             |                                         |      |      |      |       |      |      |      |      |
| Eicosadienoic acid (C20:2) No 01            | Complex lipids, fatty acids and related | 0.32 | 0.30 | 0.25 | 0.43  | 0.48 | 0.49 |      |      |
|                                             |                                         |      |      |      |       |      |      |      |      |
| Eicosadienoic acid (C20:2) No 02            | Complex lipids, fatty acids and related | 0.30 | 0.22 | 0.28 | 0.51  | 0.42 | 0.43 |      |      |
|                                             |                                         |      |      |      |       |      |      |      |      |
| Eicosaenoic acid (C20:1) No 02              | Complex lipids, fatty acids and related | 0.66 | 0.46 | 0.56 | 0.99  | 0.87 | 0.66 |      |      |
|                                             |                                         |      |      |      |       |      |      |      |      |
| Eicosanoic acid (C20:0)                     | Complex lipids, fatty acids and related | 0.67 | 0.57 | 0.63 | 0.68  | 0.70 | 0.87 |      |      |
|                                             |                                         |      |      |      |       |      |      |      |      |
| epsilon-Acetyllysine                        | Unknown                                 |      |      |      |       | 10.4 |      |      |      |
|                                             |                                         | 6.71 | 6.62 | 5.43 | 8.39  | 6    | 9.97 |      |      |
| erythro-Dihydrosphingosine (d18:0)          | Complex lipids, fatty acids and related |      |      |      |       |      |      |      |      |
|                                             |                                         | 0.22 | 0.20 | 0.30 | 0.29  | 0.49 | 0.50 |      |      |
| Fucose                                      | Carbohydrates and related               | 21.5 |      |      |       |      |      |      |      |
|                                             |                                         | 6    | 6.28 | 3.41 | 4.56  | 2.05 | 2.73 |      |      |
| Fucosterol, total                           | Miscellaneous                           | 2.71 | 2.28 | 2.65 | 2.77  | 2.06 | 1.91 |      |      |
| Fumarate                                    | Energy metabolism and related           | 4.26 | 6.04 | 4.69 | 3.15  | 3.07 | 2.93 |      |      |
| Galactose                                   | Carbohydrates and related               | 6.15 | 4.66 | 1.67 | 5.00  | 2.63 | 4.56 |      |      |
| Galactose, lipid fraction                   | Complex lipids, fatty acids and related |      |      |      |       |      |      |      |      |
|                                             |                                         | 3.18 | 1.79 | 2.27 | 2.72  | 1.98 | 2.23 |      |      |
| gamma-Aminobutyrate (GABA)                  | Hormones, signal substances and related |      |      |      |       |      |      |      |      |
|                                             |                                         | 5.00 | 4.37 | 5.37 | 3.52  | 2.32 | 3.76 |      |      |

|                                    |                                         |      |      |      |      |      |      |
|------------------------------------|-----------------------------------------|------|------|------|------|------|------|
| gamma-Tocopherol                   | Vitamins, cofactors and related         | 0.50 | 0.57 | 0.79 | 0.63 | 0.67 | 0.94 |
| gamma-Tocopherol                   | Unknown                                 | 0.59 | 0.81 | 1.32 | 0.76 | 0.81 | 1.65 |
| Glucose, lipid fraction            | Complex lipids, fatty acids and related | 5.24 | 2.03 | 1.91 | 3.58 | 3.35 | 2.13 |
| Glucose-1-phosphate                | Carbohydrates and related               | 6.74 | 6.31 | 3.17 | 3.47 | 3.50 | 2.73 |
| Glucuronic acid                    | Carbohydrates and related               | 11.6 | 7    | 5.94 | 4.98 | 2.63 | 2.57 |
| Glutamate                          | Amino acids                             | 9.18 | 2    | 5    | 7.76 | 1    | 9.88 |
| Glutamate                          | Unknown                                 | 2.50 | 3.76 | 3.40 | 3.57 | 5.97 | 4.82 |
| Glutamic acid 2TMS ME (lipid)      | Unknown                                 | 3.60 | 2.67 | 2.77 | 2.96 | 2.23 | 4.55 |
| Glutamine                          | Amino acids                             | 6.52 | 5.98 | 5.34 | 6.15 | 4.63 | 5.14 |
| Glutarate                          | Amino acids related                     | 0.40 | 0.34 | 0.19 | 0.38 | 0.47 | 0.43 |
| Glycerol, lipid fraction           | Complex lipids, fatty acids and related | 1.44 | 2.68 | 2.27 | 1.81 | 3.15 | 3.01 |
| Glycine, lipid fraction            | Miscellaneous                           | 0.91 | 0.68 | 0.72 | 1.02 | 0.81 | 1.15 |
| Glycine, lipid fraction            | Miscellaneous                           | 0.69 | 0.53 | 0.63 | 0.62 | 0.76 | 1.07 |
| Glycolate                          | Miscellaneous                           | 3.90 | 3.38 | 2.73 | 3.12 | 2.17 | 1.53 |
| Guanine                            | Nucleobases and related                 | 2.55 | 1.48 | 1.80 | 1.21 | 1.60 | 1.74 |
| Heneicosanoic acid (C21:0)         | Complex lipids, fatty acids and related | 0.51 | 0.44 | 0.42 | 0.66 | 0.58 | 0.68 |
| Heptacosanoic acid (C27:0)         | Complex lipids, fatty acids and related | 0.75 | 0.53 | 0.85 | 0.83 | 0.82 | 1.30 |
| Heptadecanoic acid (C17:0)         | Complex lipids, fatty acids and related | 0.38 | 0.28 | 0.41 | 0.41 | 0.42 | 0.61 |
| Hexadecanol                        | Complex lipids, fatty acids and related | 0.06 | 0.09 | 0.10 | 0.06 | 0.08 | 0.38 |
| Hyodeoxycholic acid                | Unknown                                 | 0.02 | 0.00 | 0.00 | 0.01 | 0.00 | 0.01 |
| Hyodeoxycholic acid                | Complex lipids, fatty acids and related | 0.32 | 0.09 | 0.26 | 0.09 | 0.04 | 0.22 |
| Hypoxanthine                       | Nucleobases and related                 | 3.22 | 3.24 | 2.47 | 4.14 | 2.76 | 1.27 |
| Indole-3-acetic acid               | Amino acids related                     | 15.8 | 28.7 | 46.8 |      |      | 32.5 |
| Inosine                            | Nucleobases and related                 | 6.02 | 8.05 | 4.53 | 5.43 | 6    | 7.05 |
| isoLCA                             | Unknown                                 | 0.01 | 0.01 | 0.01 | 0.14 | 0.19 | 0.14 |
| Isopalmitic acid (C16:0)           | Complex lipids, fatty acids and related | 0.36 | 0.25 | 0.25 | 0.60 | 0.56 | 0.80 |
| Kynurenic acid                     | Unknown                                 | 6.60 | 2.56 | 5.58 | 6.67 | 2.95 | 5.91 |
| Lignoceric acid (C24:0)            | Complex lipids, fatty acids and related | 0.70 | 0.71 | 0.75 | 1.08 | 1.04 | 0.95 |
| Linoleic acid (C18:cis[9,12]2)     | Complex lipids, fatty acids and related | 3.60 | 5.01 | 5.28 | 3.29 | 3.50 | 8.33 |
| Linolenic acid (C18:cis[9,12,15]3) | Complex lipids, fatty acids and related | 4.15 | 6.57 | 5.73 | 5.24 | 4.81 | 9.50 |
| Lithocholic acid                   | Unknown                                 | 0.02 | 0.03 | 0.02 | 0.13 | 0.10 | 0.08 |
| Mannose                            | Carbohydrates and related               | 4.22 | 7.08 | 4.32 | 4.64 | 4.11 | 4.40 |
| Methionine                         | Unknown                                 | 0.51 | 0.11 | 0.31 | 0.51 | 0.66 | 0.96 |
| myo-Inositol                       | Carbohydrates and related               | 4.01 | 8.10 | 4.93 | 9.68 | 2.90 | 0.97 |
| Myristic acid (C14:0)              | Complex lipids, fatty acids and related | 0.40 | 0.31 | 0.36 | 0.44 | 0.63 | 1.02 |
| N-Acetyl-aspartic acid             | Unknown                                 | 5.97 | 9.55 | 6    | 4.18 | 2.49 | 2.88 |

|                                                         |                                         |      |      |      |       |       |      |
|---------------------------------------------------------|-----------------------------------------|------|------|------|-------|-------|------|
| N-Acetylglucosamine                                     | Unknown                                 | 0.33 | 0.21 | 0.12 | 0.45  | 0.48  | 0.79 |
| N-Acetyl-leucine                                        | Unknown                                 | 3.50 | 6.69 | 3.32 | 1.25  | 0.66  | 1.42 |
| N-Acetylserine                                          | Unknown                                 | 5.94 | 4.24 | 1.62 | 4.23  | 5.55  | 1.55 |
| Nervonic acid (C24:cis[15]1)                            | Complex lipids, fatty acids and related | 0.41 | 0.39 | 0.64 | 0.71  | 0.61  | 0.94 |
| Niacinamide (Nicotinamide)                              | Unknown                                 | 0.72 | 0.80 | 0.63 | 1.06  | 1.48  | 1.03 |
| Nicotinic acid                                          | Vitamins, cofactors and related         | 2.29 | 3.44 | 2.24 | 1.30  | 1.29  | 1.47 |
| Norleucine                                              | Miscellaneous                           | 0.82 | 0.15 | 0.49 | 0.60  | 0.23  | 0.61 |
| Octadecanol                                             | Complex lipids, fatty acids and related | 0.08 | 0.09 | 0.17 | 0.10  | 0.13  | 0.52 |
| Oleic acid (C18:cis[9]1)                                | Complex lipids, fatty acids and related | 0.14 | 0.07 | 0.22 | 0.30  | 0.30  | 0.55 |
| o-Muricholic Acid                                       | Unknown                                 | 0.35 | 0.05 | 0.05 | 0.14  | 0.15  | 0.07 |
| Pentacosanoic acid (C25:0)                              | Complex lipids, fatty acids and related | 0.62 | 0.53 | 0.74 | 0.82  | 0.79  | 0.85 |
| Pentadecanol                                            | Complex lipids, fatty acids and related | 0.49 | 0.43 | 0.55 | 0.55  | 0.73  | 0.80 |
| Phosphate, lipid fraction                               | Complex lipids, fatty acids and related | 1.35 | 0.45 | 0.70 | 0.70  | 0.72  | 1.21 |
| Phosphoenolpyruvate (PEP)                               | Energy metabolism and related           | 5.39 | 6.03 | 4.69 | 3.62  | 3.11  | 2.42 |
| Pipecolic acid                                          | Unknown                                 | 0.46 | 0.37 | 0.48 | 0.79  | 0.76  | 0.61 |
| plausible 18:2-Lyso PC (Na-Addukt)                      | Unknown                                 | 2.52 | 4.43 | 4.56 | 2.29  | 2.69  | 2.89 |
| plausible 2-Hydroxyarachidic acid (2-OH-C20:0) TMS ME   | Unknown                                 | 0.37 | 0.31 | 0.42 | 0.55  | 0.60  | 0.85 |
| plausible 2-Hydroxytricosanoic acid (2-OH-C23:0) TMS ME | Unknown                                 | 0.47 | 0.33 | 0.50 | 0.61  | 0.71  | 0.98 |
| plausible Heptadecanol TMS                              | Unknown                                 | 0.01 | 0.02 | 0.03 | 0.01  | 0.20  | 0.70 |
| plausible SM (d18:1, C16:0) Na-Addukt                   | Unknown                                 | 4.69 | 2.72 | 3.21 | 4.47  | 2.30  | 1.89 |
| Proline betaine                                         | Unknown                                 | 2.12 | 0.91 | 2.40 | 1.01  | 1.13  | 1.25 |
| putative 12-Methylmyristic acid TMS                     | Unknown                                 | 0.03 | 0.06 | 0.04 | 0.04  | 0.26  | 0.33 |
| putative Anhydroglucuronate 4TMS                        | Unknown                                 | 4.49 | 4.72 | 2.32 | 2.49  | 3.03  | 2.23 |
| putative beta-Muricholic acid 3TMS ME (Byprodukt)       | Unknown                                 | 23.5 | 3    | 8.29 | 6.11  | 16.73 | 7.59 |
| putative Bis-(glycerol)-phosphate                       | Unknown                                 | 0.31 | 0.21 | 0.34 | 0.30  | 0.79  | 1.24 |
| putative C16:1 ME                                       | Unknown                                 | 1.14 | 1.67 | 1.86 | 1.51  | 2.71  | 3.10 |
| putative Choline plasmalogen (C36:2)                    | Unknown                                 | 3.14 | 3.20 | 3.83 | 3.80  | 1.61  | 1.64 |
| putative Deoxycholyglycine deriv #1                     | Unknown                                 | 0.01 | 0.01 | 0.01 | 0.22  | 0.40  | 0.24 |
| putative Hydroxy-eicosan OTMS                           | Unknown                                 | 0.28 | 0.26 | 0.49 | 0.35  | 0.38  | 0.64 |
| putative Hyodeoxycholic acid 3TMS                       | Unknown                                 | 0.02 | 0.01 | 0.08 | 0.02  | 0.01  | 0.10 |
| putative Lithocholic acid OTMS ME                       | Unknown                                 | 0.05 | 0.04 | 0.04 | 0.19  | 0.25  | 0.07 |
| putative MeOx impurity (Blank)                          | Unknown                                 | 3.15 | 2.53 | 3.11 | 2.81  | 2.35  | 3.76 |
| putative Tetracosenoic acid ME                          | Unknown                                 | 0.72 | 0.36 | 0.54 | 1.21  | 1.08  | 0.70 |
| Putrescine                                              | Miscellaneous                           | 69.4 | 3    | 9.90 | 3     | 54.78 | 15.8 |
| Pyruvate                                                | Energy metabolism and related           | 2.68 | 18.2 | 17.9 | 25.0  | 1.64  | 2.10 |
| scyllo-Inositol                                         | Carbohydrates and related               | 0    | 2    | 1    | 16.03 | 6.98  | 3.70 |
| Serine, lipid fraction                                  | Miscellaneous                           | 0.74 | 1068 | 939. | 1052  | 1018. | 0.62 |
| Shikimic acid                                           | Miscellaneous                           | .12  | 60   | .99  | 27    | 5.83  | 2.43 |



|                              |                                         |      |      |      |       |      |      |
|------------------------------|-----------------------------------------|------|------|------|-------|------|------|
| Stearic acid (C18:0)         | Complex lipids, fatty acids and related | 0.43 | 0.38 | 0.60 | 0.45  | 0.46 | 0.66 |
| Stigmastanol, total          | Miscellaneous                           | 0.65 | 0.76 | 0.74 | 0.62  | 0.80 | 0.84 |
| Stigmasterol, total          | Miscellaneous                           | 2.67 | 2.24 | 2.22 | 2.31  | 2.15 | 1.93 |
|                              |                                         | 29.1 | 28.1 | 21.6 |       | 42.4 | 23.2 |
| Taurine                      | Unknown                                 | 6    | 9    | 3    | 42.26 | 8    | 6    |
|                              |                                         |      | 26.5 | 12.7 |       | 12.3 |      |
| Tauro-b-muricholic Acid      | Unknown                                 | 3.50 | 0    | 0    | 10.01 | 4    | 2.03 |
|                              |                                         | 13.1 |      |      |       |      |      |
| Taurocholic acid             | Unknown                                 | 4    | 7.95 | 8.36 | 22.60 | 9.78 | 5.10 |
|                              |                                         | 15.2 | 921. | 113. |       | 759. |      |
| Taurocholic Acid 3-sulfate   | Unknown                                 | 4    | 65   | 19   | 83.21 | 51   | 0.13 |
|                              |                                         |      | 110. | 12.6 |       | 19.4 |      |
| Taurocholic acid sodium salt | Unknown                                 | 4.49 | 41   | 3    | 8.93  | 0    | 0.33 |
|                              | Complex lipids, fatty acids and related |      |      |      |       |      |      |
| Tetradecanol                 | Complex lipids, fatty acids and related | 0.18 | 0.08 | 0.13 | 0.20  | 0.15 | 0.40 |
| Thiamine (Vitamin B1)        | Unknown                                 | 0.18 | 0.17 | 0.22 | 0.22  | 0.28 | 0.29 |
|                              | Complex lipids, fatty acids and related |      |      |      |       |      |      |
| threo-Sphingosine (d18:1)    | Complex lipids, fatty acids and related | 1.74 | 1.48 | 2.17 | 2.41  | 2.82 | 2.54 |
| trans-4-Hydroxyproline       | Amino acids related                     | 3.96 | 3.72 | 3.51 | 4.77  | 4.90 | 2.63 |
|                              |                                         |      |      | 10.3 |       |      |      |
| trans-Ferulic acid           | Miscellaneous                           | 6.02 | 9.98 | 5    | 2.58  | 2.80 | 3.50 |
|                              |                                         | 26.1 | 60.9 | 43.9 |       | 12.9 |      |
| trans-Sinapic acid           | Miscellaneous                           | 7    | 8    | 6    | 14.85 | 7    | 8.36 |
|                              | Complex lipids, fatty acids and related |      |      |      |       |      |      |
| Tricosanoic acid (C23:0)     | Complex lipids, fatty acids and related | 0.57 | 0.49 | 0.56 | 0.79  | 0.67 | 0.87 |
|                              |                                         | 51.6 | 40.2 | 30.6 |       |      |      |
| Tryptophan                   | Amino acids                             | 0    | 9    | 1    | 2.58  | 3.42 | 4.78 |
|                              |                                         | 34.3 | 15.9 | 21.2 |       |      |      |
| Tyramine                     | Amino acids related                     | 0    | 7    | 6    | 8.00  | 8.15 | 6.30 |
| Tyrosine                     | Unknown                                 | 0.32 | 0.16 | 0.24 | 0.65  | 0.56 | 0.41 |
| Ubichinone-30 (Coenzyme Q6)  | Unknown                                 | 0.69 | 0.45 | 0.70 | 0.74  | 0.78 | 0.87 |
| Ubichinone-35 (Coenzyme Q7)  | Unknown                                 | 0.71 | 0.39 | 0.60 | 0.78  | 0.67 | 0.80 |
| Ubichinone-45 (Coenzyme Q9)  | Unknown                                 | 0.84 | 0.43 | 0.66 | 0.80  | 0.76 | 0.80 |
| Unknown lipid MB (828450473) | Unknown                                 | 5.14 | 2.96 | 2.15 | 2.74  | 2.81 | 3.30 |
| Unknown lipid MB (828451241) | Unknown                                 | 0.10 | 0.04 | 0.15 | 0.11  | 0.13 | 0.40 |
| Unknown lipid MB (828451312) | Unknown                                 | 0.20 | 0.49 | 0.15 | 0.75  | 1.09 | 0.44 |
| Unknown lipid MB (828451316) | Unknown                                 | 2.28 | 3.75 | 2.36 | 2.11  | 1.94 | 3.67 |
| Unknown lipid MB (828451380) | Unknown                                 | 0.75 | 0.39 | 0.50 | 1.09  | 0.94 | 0.95 |
| Unknown lipid MB (828451443) | Unknown                                 | 0.70 | 0.64 | 0.68 | 0.74  | 0.95 | 1.02 |
| Unknown lipid MB (828451444) | Unknown                                 | 0.68 | 0.44 | 0.57 | 1.44  | 1.04 | 0.81 |
| Unknown lipid MB (828451445) | Unknown                                 | 0.32 | 0.31 | 0.41 | 0.38  | 0.44 | 0.63 |
| Unknown lipid MB (828451931) | Unknown                                 | 0.01 | 0.01 | 0.04 | 0.01  | 0.32 | 1.60 |
| Unknown lipid MB (828451933) | Unknown                                 | 0.10 | 0.05 | 0.17 | 0.09  | 0.13 | 0.31 |
| Unknown lipid MB (828451937) | Unknown                                 | 0.00 | 0.00 | 0.02 | 0.01  | 0.18 | 0.55 |
| Unknown lipid MB (828451940) | Unknown                                 | 0.00 | 0.00 | 0.02 | 0.00  | 0.16 | 0.51 |
| Unknown lipid MB (828452038) | Unknown                                 | 0.02 | 0.02 | 0.02 | 0.03  | 0.16 | 0.93 |
| Unknown lipid MB (828452040) | Unknown                                 | 0.57 | 0.19 | 0.25 | 0.25  | 0.31 | 0.55 |
| Unknown lipid MB (828452041) | Unknown                                 | 0.02 | 0.03 | 0.09 | 0.01  | 0.19 | 0.70 |
| Unknown lipid MB (828452042) | Unknown                                 | 0.00 | 0.00 | 0.00 | NA    | 0.01 | 0.01 |
| Unknown lipid MB (828452043) | Unknown                                 | 0.00 | 0.01 | 0.05 | 0.00  | 0.19 | 0.60 |
| Unknown lipid MB (828452044) | Unknown                                 | 0.71 | 0.46 | 0.48 | 0.97  | 1.00 | 1.28 |
| Unknown lipid MB (828452047) | Unknown                                 | 0.01 | 0.01 | 0.06 | 0.01  | 0.21 | 0.53 |

|                                      |         |      |      |      |       |      |      |
|--------------------------------------|---------|------|------|------|-------|------|------|
| Unknown lipid MB (828452050)         | Unknown | 0.03 | 0.05 | 0.05 | NA    | 0.19 | 0.52 |
| Unknown lipid MB (828452059)         | Unknown | 0.37 | 0.07 | 0.04 | 0.38  | 0.11 | 0.04 |
| Unknown lipid MB ESI neg (858450034) | Unknown | 0.49 | 0.47 | 0.39 | 0.59  | 0.55 | 0.53 |
| Unknown lipid MB ESI neg (858450047) | Unknown | 57.2 | 26.2 | 21.3 |       | 23.3 |      |
| Unknown lipid MB ESI neg (858450068) | Unknown | 1    | 1    | 8    | 98.40 | 7    | 4.49 |
| Unknown lipid MB ESI neg (858450071) | Unknown | 0.48 | 0.48 | 0.57 | 0.58  | 0.72 | 0.61 |
| Unknown lipid MB ESI pos (848450056) | Unknown | 4.73 | 6.17 | 4.29 | 3.81  | 3.32 | 5.15 |
| Unknown lipid MB ESI pos (848450065) | Unknown | 4.17 | 8.14 | 5.98 | 5.54  | 5.29 | 6.06 |
| Unknown lipid MB ESI pos (848450067) | Unknown | 2.49 | 3.20 | 3.68 | 2.54  | 1.46 | 2.16 |
| Unknown lipid MB ESI pos (848450068) | Unknown | 4.18 | 3.90 | 2.31 | 2.17  | 1.74 | 1.62 |
| Unknown lipid MB ESI pos (848450069) | Unknown | 2.86 | 6.16 | 4.11 | 2.82  | 2.68 | 4.19 |
| Unknown lipid MB ESI pos (848450083) | Unknown | 2.90 | 5.19 | 5.29 | 3.19  | 3.54 | 5.48 |
| Unknown lipid MB ESI pos (848450084) | Unknown | 4.11 | 3.76 | 1.89 | 7.86  | 3.74 | 1.47 |
| Unknown lipid MB ESI pos (848450091) | Unknown | 2.54 | 3.06 | 2.54 | 3.81  | 3.69 | 2.20 |
| Unknown lipid MB ESI pos (848450092) | Unknown | 0.44 | 0.44 | 1.37 | 0.62  | 0.53 | 0.69 |
| Unknown lipid MB ESI pos (848450094) | Unknown | 0.37 | 0.36 | 0.27 | 0.31  | 0.51 | 0.35 |
| Unknown lipid MB ESI pos (848450096) | Unknown | 4.35 | 2.99 | 6.29 | 2.61  | 1.37 | 1.55 |
| Unknown lipid MB ESI pos (848450097) | Unknown | 2.72 | 3.72 | 2.70 | 1.85  | 2.54 | 2.93 |
| Unknown lipid MB ESI pos (848450100) | Unknown | 9.25 | 9.08 | 6.92 | 4.24  | 1.92 | 2.00 |
| Unknown lipid MB ESI pos (848450102) | Unknown | 4.32 | 5.37 | 3.63 | 3.01  | 1.64 | 1.82 |
| Unknown lipid MB ESI pos (848450103) | Unknown | 4.06 | 3.13 | 2.96 | 4.82  | 0.75 | 1.26 |
| Unknown lipid MB ESI pos (848450105) | Unknown | 4.12 | 4.85 | 3.26 | 4.88  | 1.52 | 1.37 |
| Unknown lipid MB ESI pos (848450106) | Unknown | 11.9 | 15.2 |      |       |      |      |
| Unknown lipid MB ESI pos (848450107) | Unknown | 7    | 6    | 5.77 | 9.49  | 2.50 | 2.56 |
| Unknown lipid MB ESI pos (848450108) | Unknown | 7.04 | 3.90 | 3.07 | 4.84  | 3.14 | 1.24 |
| Unknown lipid MB ESI pos (848450109) | Unknown | 1.80 | 2.79 | 2.07 | 2.39  | 2.31 | 1.64 |
| Unknown lipid MB ESI pos (848450110) | Unknown | 3.91 | 4.07 | 3.33 | 4.48  | 3.14 | 2.23 |
| Unknown lipid MB ESI pos (848450111) | Unknown | 2.41 | 2.46 | 2.65 | 3.39  | 1.86 | 1.80 |
| Unknown lipid MB ESI pos (848450112) | Unknown | 11.7 |      |      |       |      |      |
| Unknown lipid MB ESI pos (848450113) | Unknown | 6    | 6.96 | 5.32 | 6.78  | 4.08 | 2.65 |
| Unknown lipid MB ESI pos (848450114) | Unknown | 2.47 | 5.61 | 3.61 | 1.67  | 3.22 | 3.87 |
| Unknown lipid MB ESI pos (848450115) | Unknown | 2.93 | 2.96 | 2.99 | 3.03  | 2.42 | 3.00 |
| Unknown lipid MB ESI pos (848450116) | Unknown | 3.95 | 7.50 | 5.33 | 3.71  | 5.00 | 6.14 |

|                                      |         |      |      |      |       |      |      |
|--------------------------------------|---------|------|------|------|-------|------|------|
| Unknown lipid MB ESI pos (848450114) | Unknown | 4.58 | 4.96 | 4.71 | 5.12  | 3.08 | 2.21 |
| Unknown lipid MB ESI pos (848450115) | Unknown | 2.41 | 2.39 | 1.90 | 2.55  | 1.56 | 1.05 |
| Unknown lipid MB ESI pos (848450116) | Unknown | 6.69 | 6.06 | 4.23 | 6.23  | 6.30 | 2.15 |
| Unknown lipid MB ESI pos (848450117) | Unknown | 3.60 | 2.38 | 2.27 | 2.05  | 0.94 | 0.88 |
| Unknown lipid MB ESI pos (848450119) | Unknown | 2.39 | 2.37 | 1.59 | 1.72  | 0.89 | 0.87 |
| Unknown lipid MB ESI pos (848450120) | Unknown | 2.16 | 2.24 | 2.34 | 2.41  | 1.38 | 1.29 |
| Unknown lipid MB ESI pos (848450129) | Unknown | 2.42 | 2.86 | 2.55 | 3.43  | 2.53 | 1.96 |
| Unknown lipid MB ESI pos (848450131) | Unknown | 4.19 | 5.11 | 3.70 | 7.98  | 3.95 | 2.09 |
| Unknown lipid MB ESI pos (848450132) | Unknown | 3.89 | 3.33 | 2.94 | 5.29  | 2.85 | 2.28 |
| Unknown lipid MB ESI pos (848450138) | Unknown | 4.18 | 3.72 | 3.77 | 4.65  | 2.80 | 2.01 |
| Unknown lipid MB ESI pos (848450139) | Unknown | 5.07 | 8.69 | 4.45 | 6.92  | 2.24 | 0.86 |
| Unknown lipid MB ESI pos (848450142) | Unknown | 7.33 | 8.84 | 5.28 | 7.29  | 3.16 | 1.39 |
| Unknown lipid MB ESI pos (848450144) | Unknown | 3.93 | 6.92 | 5.65 | 4.72  | 5.39 | 3.22 |
| Unknown lipid MB ESI pos (848450146) | Unknown | 4.06 | 4.74 | 3.57 | 3.63  | 3.61 | 2.25 |
| Unknown lipid MB ESI pos (848450147) | Unknown | 1.70 | 2.23 | 2.43 | 1.96  | 1.87 | 1.68 |
| Unknown lipid MB ESI pos (848450148) | Unknown | 6.10 | 6.93 | 5.04 | 5.57  | 6.39 | 2.88 |
| Unknown lipid MB ESI pos (848450170) | Unknown | 2.03 | 1.30 | 1.50 | 2.68  | 2.36 | 2.15 |
| Unknown lipid MB ESI pos (848450196) | Unknown | 9.25 | 5    | 0    | 5.64  | 5    | 2    |
| Unknown lipid MB ESI pos (848450201) | Unknown | 8.90 | 8.63 | 7.76 | 6.68  | 10.5 | 10.6 |
| Unknown lipid MB ESI pos (848450202) | Unknown | 3.56 | 2.98 | 3.65 | 2.90  | 7    | 3    |
| Unknown lipid MB ESI pos (848450204) | Unknown | 11.6 | 11.7 | 10.8 | 2.98  | 12.9 | 15.6 |
| Unknown lipid MB ESI pos (848450205) | Unknown | 5    | 3    | 9    | 8.19  | 7    | 5    |
| Unknown lipid MB ESI pos (848450206) | Unknown | 11.0 | 10.0 |      |       | 12.5 | 11.8 |
| Unknown lipid MB ESI pos (848450207) | Unknown | 2    | 5    | 9.95 | 7.30  | 1    | 4    |
| Unknown lipid MB ESI pos (848450208) | Unknown | 11.3 | 18.0 | 14.7 |       | 20.3 | 18.8 |
| Unknown lipid MB ESI pos (848450209) | Unknown | 2    | 1    | 1    | 9.45  | 1    | 6    |
| Unknown lipid MB ESI pos (848450210) | Unknown | 12.5 | 15.2 | 11.8 |       | 14.1 | 15.4 |
| Unknown lipid MB ESI pos (848450211) | Unknown | 5    | 9    | 1    | 10.28 | 5    | 3    |
| Unknown lipid MB ESI pos (848450212) | Unknown | 10.3 | 11.5 |      |       |      | 13.3 |
| Unknown lipid MB ESI pos (848450213) | Unknown | 9    | 9    | 9.44 | 7.81  | 9.48 | 2    |
| Unknown lipid MB ESI pos (848450214) | Unknown | 8.03 | 8.21 | 5.99 | 6.48  | 7.95 | 7.37 |
| Unknown lipid MB ESI pos (848450215) | Unknown |      |      |      |       |      | 13.2 |
| Unknown lipid MB ESI pos (848450216) | Unknown | 8.10 | 8.90 | 9.38 | 5.61  | 7.56 | 1    |
| Unknown lipid MB ESI pos (848450217) | Unknown |      |      | 10.0 |       |      | 10.5 |
| Unknown lipid MB ESI pos (848450218) | Unknown | 7.65 | 8.92 | 9    | 7.13  | 9.75 | 3    |
| Unknown lipid MB ESI pos (848450219) | Unknown |      | 10.9 | 11.1 |       | 12.6 | 13.7 |
| Unknown lipid MB ESI pos (848450220) | Unknown | 9.43 | 8    | 8    | 8.34  | 8    | 8    |

|                                      |         |      |      |      |       |      |      |
|--------------------------------------|---------|------|------|------|-------|------|------|
| Unknown lipid MB ESI pos (848450214) | Unknown | 8.04 | 8.99 | 10.1 | 8.08  | 11.0 | 12.1 |
| Unknown lipid MB ESI pos (848450215) | Unknown | 8.97 | 11.8 | 10.5 | 7.88  | 11.2 | 15.2 |
| Unknown lipid MB ESI pos (848450216) | Unknown | 8.52 | 10.1 | 9.01 | 7.81  | 10.3 | 10.3 |
| Unknown lipid MB ESI pos (848450218) | Unknown | 9.06 | 10.7 | 9.49 | 8.20  | 8.92 | 11.9 |
| Unknown lipid MB ESI pos (848450219) | Unknown | 7.96 | 8.99 | 9.37 | 6.47  | 9.22 | 10.3 |
| Unknown polar MB (838450146)         | Unknown | 3.71 | 2.96 | 1.90 | 1.78  | 2.07 | 1.33 |
| Unknown polar MB (838450379)         | Unknown | 0.83 | 0.70 | 0.65 | 1.00  | 0.94 | 0.98 |
| Unknown polar MB (838450566)         | Unknown | 1.81 | 3.38 | 1.67 | 2.81  | 1.15 | 1.06 |
| Unknown polar MB (838450590)         | Unknown | 0.64 | 0.14 | 0.40 | 0.39  | 0.27 | 0.58 |
| Unknown polar MB (838450618)         | Unknown | 2.55 | 2.41 | 1.94 | 1.67  | 1.66 | 0.97 |
| Unknown polar MB (838450621)         | Unknown | 13.3 | 10.1 | 12.5 | 3     | 6    | 3    |
| Unknown polar MB (838450692)         | Unknown | 3    | 6    | 3    | 5.95  | 3.91 | 1.97 |
| Unknown polar MB (838450761)         | Unknown | 0.16 | 0.19 | 0.23 | 0.17  | 0.34 | 0.23 |
| Unknown polar MB (838450807)         | Unknown | 4.27 | 2.81 | 2.59 | 3.94  | 2.53 | 1.09 |
| Unknown polar MB (838450816)         | Unknown | 2.07 | 2.19 | 1.88 | 2.13  | 2.14 | 2.41 |
| Unknown polar MB (838450890)         | Unknown | 0.01 | 0.00 | 0.00 | 0.01  | 0.00 | 0.01 |
| Unknown polar MB (838450990)         | Unknown | 1.38 | 1.42 | 1.33 | 1.07  | 0.90 | 0.91 |
| Unknown polar MB (838451614)         | Unknown | 0.02 | 0.10 | 0.03 | 0.02  | 0.05 | 0.02 |
| Unknown polar MB (838452021)         | Unknown | 0.41 | 0.53 | 0.55 | 0.50  | 0.60 | 0.62 |
| Unknown polar MB (838452022)         | Unknown | 2.74 | 2.81 | 2.47 | 2.24  | 2.18 | 1.98 |
| Unknown polar MB (838452079)         | Unknown | 2.13 | 2.19 | 2.06 | 3.22  | 1.90 | 2.25 |
| Unknown polar MB (838452178)         | Unknown | 0.12 | 0.09 | 0.27 | 0.17  | 0.29 | 0.53 |
| Unknown polar MB (838452196)         | Unknown | 3.25 | 2.15 | 2.01 | 2.39  | 1.55 | 1.21 |
| Unknown polar MB (838452482)         | Unknown | 380. | 161. | 245. | 397.5 | 27.1 | 85.9 |
| Unknown polar MB (838452999)         | Unknown | 41   | 12   | 70   | 6     | 0    | 9    |
| Unknown polar MB (838453005)         | Unknown | 11.5 | 43.1 | 22.5 | 18.9  | 1    | 6    |
| Unknown polar MB (838453006)         | Unknown | 1    | 6    | 9    | 14.18 | 8    | 6.97 |
| Unknown polar MB (838453009)         | Unknown | 0.23 | 0.19 | 0.17 | 0.13  | 0.24 | 0.23 |
| Unknown polar MB (838453012)         | Unknown | 0.21 | 0.23 | 0.32 | 0.15  | 0.17 | 0.29 |
| Unknown polar MB (838453015)         | Unknown | 0.06 | 0.03 | 0.02 | 0.04  | 0.02 | 0.03 |
| Unknown polar MB (838453017)         | Unknown | 130. | 71.0 | 52.5 | 217.8 | 77.7 | 78.9 |
| Unknown polar MB (838453018)         | Unknown | 85   | 3    | 4    | 3     | 1    | 1    |
| Unknown polar MB (838453019)         | Unknown | 0.18 | 0.07 | 0.27 | 0.20  | 0.22 | 0.32 |
| Unknown polar MB (838453020)         | Unknown | 0.12 | 0.09 | 0.07 | 0.05  | 0.07 | 0.19 |
| Unknown polar MB (838453026)         | Unknown | 0.10 | 0.09 | 0.15 | 0.07  | 0.23 | 0.39 |
| Unknown polar MB (838453028)         | Unknown | 0.06 | 0.04 | 0.03 | 0.14  | 0.08 | 0.02 |
| Unknown polar MB (838453033)         | Unknown | 1.86 | 1.62 | 2.09 | 1.58  | 2.79 | 1.48 |
| Unknown polar MB (838453036)         | Unknown | 0.13 | 0.17 | 0.21 | 0.17  | 0.12 | 0.19 |
| Unknown polar MB (838453040)         | Unknown | 0.11 | 0.06 | 0.04 | 0.07  | 0.04 | 0.05 |
| Unknown polar MB (838453041)         | Unknown | 0.13 | 0.05 | 0.03 | 0.05  | 0.04 | 0.06 |
| Unknown polar MB (838453044)         | Unknown | 0.03 | 0.02 | 0.03 | 0.05  | 0.06 | 0.04 |
| Unknown polar MB (838453047)         | Unknown | 0.05 | 0.03 | 0.03 | 0.05  | 0.14 | 0.11 |
| Unknown polar MB (838453048)         | Unknown | 0.12 | 0.10 | 0.12 | 0.14  | 0.11 | 0.24 |
| Unknown polar MB (838453051)         | Unknown | 0.46 | 0.29 | 0.37 | 0.48  | 0.58 | 0.81 |
|                                      |         | 0.20 | 0.08 | 0.15 | 0.25  | 0.10 | 0.18 |
|                                      |         | 0.15 | 0.11 | 0.06 | 0.31  | 0.16 | 0.12 |
|                                      |         | 0.41 | 0.48 | 0.53 | 0.71  | 0.71 | 0.71 |

|                                      |                           |             |             |             |             |             |             |
|--------------------------------------|---------------------------|-------------|-------------|-------------|-------------|-------------|-------------|
| Unknown polar MB (838453052)         | Unknown                   | 0.41        | 0.19        | 0.15        | 0.37        | 0.61        | 0.31        |
| Unknown polar MB (838453053)         | Unknown                   | 0.28        | 0.22        | 0.19        | 0.48        | 1.88        | 0.66        |
| Unknown polar MB (838453055)         | Unknown                   | 0.16        | 0.08        | 0.03        | 0.07        | 0.09        | 0.02        |
| Unknown polar MB (838453056)         | Unknown                   | 0.51        | 0.41        | 0.19        | 0.48        | 0.32        | 0.32        |
| Unknown polar MB (838453057)         | Unknown                   | 0.47        | 0.37        | 0.24        | 0.31        | 0.21        | 0.32        |
| Unknown polar MB (838453058)         | Unknown                   | 0.58        | 0.07        | 0.05        | 0.43        | 0.08        | 0.23        |
| Unknown polar MB (838453059)         | Unknown                   | <b>3.50</b> | <b>3.10</b> | <b>2.86</b> | <b>3.09</b> | <b>3.14</b> | 1.63        |
| Unknown polar MB (838453061)         | Unknown                   | 0.83        | 0.71        | 0.66        | 0.64        | 0.75        | 0.68        |
| Unknown polar MB (838453062)         | Unknown                   | 0.42        | 0.55        | 0.57        | 0.58        | 0.84        | 0.75        |
| Unknown polar MB (838453063)         | Unknown                   | 0.55        | 0.03        | 0.05        | 0.20        | 0.05        | 0.09        |
| Unknown polar MB (838453066)         | Unknown                   | 0.01        | 0.00        | 0.01        | 0.01        | 0.00        | 0.04        |
| Unknown polar MB (838453067)         | Unknown                   | <b>5.07</b> | <b>5.05</b> | <b>2.26</b> | <b>2.17</b> | <b>1.92</b> | <b>1.56</b> |
| Unknown polar MB ESI neg (878450071) | Unknown                   | <b>2.74</b> | <b>3.70</b> | <b>3.55</b> | <b>2.80</b> | 2.44        | <b>3.36</b> |
| Uracil                               | Nucleobases and related   | 0.17        | 0.06        | 0.17        | 0.25        | 0.14        | 0.33        |
| Xanthurenic acid                     | Amino acids related       | 0.19        | 0.10        | 0.10        | 0.09        | 0.09        | 0.08        |
|                                      |                           |             | <b>11.6</b> |             |             |             |             |
| Xylose                               | Carbohydrates and related | <b>5.98</b> | <b>3</b>    | <b>2.78</b> | 1.64        | 1.64        | 1.43        |

**Table S3:** Doripenem-induced feces metabolite fold changes in female (f) Wistar rats (N=5 per group) dosed with 100 (LD) and 300 (HD) mg/kg bw/day for 7, 14 and 28 days (f7, f14 and f28). Statistically significant changes (Welch-t-test; p-value < 0.05) are shown in bold numbers where red boxes mean a significant increase in the respective fecal metabolites and yellow a significant reduction compared to control levels.

| Metabolite                          | Class                                   | Doripenem HD |             |             | Doripenem LD |             |             |
|-------------------------------------|-----------------------------------------|--------------|-------------|-------------|--------------|-------------|-------------|
|                                     |                                         | f7           | f14         | f28         | f7           | f14         | f28         |
| 1,25-Dihydroxy-vitamin D3           | Unknown                                 | 0.74         | 0.78        | 0.59        | 1.06         | 1.31        | 1.24        |
| 1,2-Anhydroribose                   | Carbohydrates and related               | <b>6.30</b>  | <b>4.09</b> | <b>3.44</b> | <b>3.55</b>  | <b>2.59</b> | <b>2.18</b> |
| 1,4-Hydroquinone                    | Miscellaneous                           | <b>2.27</b>  | <b>1.79</b> | <b>1.65</b> | <b>1.47</b>  | 0.96        | 1.15        |
| 14-Methylhexadecanoic acid          | Complex lipids, fatty acids and related | 0.30         | 0.16        | 0.09        | 0.17         | 0.42        | 1.07        |
| 15-Methylhexadecanoic acid          | Complex lipids, fatty acids and related | 0.27         | 0.26        | 0.24        | 0.30         | 0.30        | 1.02        |
| 16-Methylheptadecanoic acid         | Complex lipids, fatty acids and related | 0.68         | 0.33        | 0.28        | 0.66         | 0.91        | 1.09        |
| 17-Methyloctadecanoic acid          | Complex lipids, fatty acids and related | 0.61         | 0.44        | 0.28        | 0.51         | 0.78        | 0.98        |
| 22-Hydroxydocosanoic acid (C22:0)   | Complex lipids, fatty acids and related | 0.64         | 0.58        | 0.63        | 1.01         | 0.96        | 1.10        |
| 2-Amino adipic acid                 | Amino acids related                     | <b>2.67</b>  | <b>4.58</b> | <b>2.26</b> | <b>1.46</b>  | <b>2.79</b> | <b>2.97</b> |
| 2-Hydroxybehenic acid (C22:0)       | Complex lipids, fatty acids and related | 0.27         | 0.28        | 0.26        | 0.58         | 0.78        | 0.96        |
| 2-Hydroxycerotic acid (C26:0)       | Complex lipids, fatty acids and related | 0.27         | 0.31        | 0.26        | 0.52         | 0.71        | 0.79        |
| 2-Hydroxynervonic acid (C24:1)      | Complex lipids, fatty acids and related | 0.22         | 0.27        | 0.28        | 0.48         | 0.91        | 0.81        |
| 2-Hydroxypalmitic acid (C16:0)      | Complex lipids, fatty acids and related | 0.25         | 0.21        | 0.16        | 0.44         | 0.66        | 0.63        |
| 2-Hydroxypentacosanoic acid (C25:0) | Complex lipids, fatty acids and related | 0.29         | 0.31        | 0.28        | 0.51         | 0.70        | 0.84        |
| 3-Hydroxybutyrate                   | Energy metabolism and related           | <b>24.7</b>  | <b>10.2</b> | <b>9.09</b> | 1.60         | 1.11        | <b>3.20</b> |
| 3-Hydroxyphenylacetic acid          | Amino acids related                     | 0.07         | 0.01        | 0.09        | 0.07         | 0.04        | 0.11        |

|                                                       |                                         |      |      |      |      |      |      |
|-------------------------------------------------------|-----------------------------------------|------|------|------|------|------|------|
| 4-Hydroxyphenylacetic acid                            | Amino acids related                     | 6.56 | 0.39 | 0.14 | 30.0 | 22.1 | 11.6 |
| 4-Hydroxysphinganine (t18:0, Phytosphingosine), total | Complex lipids, fatty acids and related | 3.66 | 2.42 | 1.72 | 7.71 | 3.76 | 3.11 |
|                                                       |                                         | 12.1 | 13.2 |      |      | 13.1 | 11.1 |
| 5-Oxoproline                                          | Amino acids related                     | 9    | 5    | 4.83 | 8.43 | 3    | 6    |
|                                                       | Vitamins, cofactors and related         |      |      |      |      |      | 22.9 |
| 6-Hydroxynicotinic acid                               |                                         | 1.95 | 2.42 | 4.16 | 6.18 | 4.12 | 0    |
| Adenine                                               | Nucleobases and related                 | 0.41 | 0.25 | 0.37 | 0.25 | 0.21 | 0.32 |
| Adenosine                                             | Nucleobases and related                 | 0.42 | 0.20 | 0.47 | 0.44 | 0.45 | 0.57 |
| Alanine                                               | Amino acids                             | 0.39 | 7.97 | 3.68 | 0.47 | 0.57 | 1.07 |
|                                                       |                                         | 87.2 | 59.6 | 67.0 | 222. | 291. | 69.8 |
| Allantoin                                             | Nucleobases and related                 | 9    | 7    | 6    | 29   | 94   | 0    |
| alpha-Amyrin TMS                                      | Unknown                                 | 0.47 | 0.42 | 0.43 | 0.61 | 0.67 | 0.64 |
|                                                       | Vitamins, cofactors and related         |      |      |      |      |      |      |
| alpha-Tocopherol                                      |                                         | 0.42 | 0.67 | 0.65 | 0.92 | 1.06 | 1.45 |
| alpha-Tocopherol                                      | Unknown                                 | 0.04 | 0.12 | 0.10 | 0.35 | 0.04 | 0.06 |
| alpha-Tocotrienol                                     | Unknown                                 | 0.08 | 0.21 | 0.18 | 0.44 | 0.05 | 0.09 |
|                                                       | Carbohydrates and related               | 10.4 |      |      |      |      |      |
| Arabinose                                             |                                         | 4    | 2.94 | 2.22 | 1.67 | 1.71 | 2.54 |
| Arginine                                              | Amino acids                             | 1.40 | 3.87 | 4.73 | 1.53 | 1.42 | 2.71 |
| Arginine                                              | Amino acids                             | 2.04 | 5.16 | 3.06 | 0.72 | 2.15 | 2.38 |
|                                                       | Complex lipids, fatty acids and related |      |      |      |      |      |      |
| Behenic acid (C22:0)                                  |                                         | 0.55 | 0.60 | 0.52 | 0.70 | 0.90 | 0.93 |
| beta-/gamma-Tocotrienol                               | Unknown                                 | 0.46 | 0.68 | 0.66 | 0.71 | 0.76 | 1.12 |
| beta-/gamma-Tocotrienol                               | Unknown                                 | 0.44 | 0.72 | 0.58 | 0.66 | 0.72 | 0.93 |
| beta-Amyrin TMS                                       | Unknown                                 | 0.50 | 0.45 | 0.53 | 0.65 | 0.63 | 0.81 |
| beta-Sitosterol, total                                | Miscellaneous                           | 2.65 | 4.31 | 3.90 | 3.57 | 3.12 | 3.29 |
|                                                       | Complex lipids, fatty acids and related |      |      |      |      |      |      |
| Bile acid No 01                                       |                                         | 0.50 | 0.55 | 0.10 | 2.76 | 1.46 | 0.59 |
|                                                       | Complex lipids, fatty acids and related |      |      |      |      |      |      |
| Bile acid No 07                                       |                                         | 0.37 | 0.17 | 0.18 | 0.56 | 0.45 | 0.49 |
| Campesterol, total                                    | Miscellaneous                           | 2.67 | 3.68 | 3.04 | 3.66 | 3.06 | 2.64 |
| Catechol                                              | Miscellaneous                           | 0.66 | 0.56 | 0.42 | 0.98 | 0.62 | 0.91 |
|                                                       | Complex lipids, fatty acids and related |      |      |      |      |      |      |
| Cerebronic acid (2-OH-C24:0)                          |                                         | 0.30 | 0.35 | 0.28 | 0.58 | 0.86 | 0.92 |
|                                                       | Complex lipids, fatty acids and related |      |      |      |      |      |      |
| Cerotic acid (C26:0)                                  |                                         | 0.46 | 0.48 | 0.58 | 0.54 | 0.79 | 1.02 |
|                                                       | Complex lipids, fatty acids and related |      |      |      |      |      |      |
| Cholestenol No 02                                     |                                         | 0.30 | 0.31 | 0.34 | 0.64 | 0.69 | 0.89 |
|                                                       | Complex lipids, fatty acids and related |      |      |      |      |      |      |
| Cholesterol, total                                    |                                         | 3.22 | 2.51 | 1.54 | 5.21 | 2.44 | 2.15 |
|                                                       |                                         |      |      |      | 15.5 | 15.7 | 15.6 |
| Cholic acid                                           | Unknown                                 | 3.44 | 2.81 | 5.60 | 0    | 6    | 1    |
| Citrulline                                            | Unknown                                 | 0.58 | 4.80 | 6.89 | 0.37 | 0.37 | 0.44 |
| Coenzyme Q10                                          | Unknown                                 | 0.47 | 0.42 | 0.43 | 0.83 | 0.72 | 0.98 |
| conjugated Linoleic acid (C18:trans[9,11]2)           | Complex lipids, fatty acids and related |      |      |      |      |      |      |
|                                                       |                                         | 0.36 | 0.41 | 0.36 | 0.54 | 0.95 | 1.65 |
| Cortisol (lipid)                                      | Unknown                                 | 0.31 | 0.27 | 0.24 | 0.52 | 0.51 | 0.72 |
|                                                       |                                         | 41.9 | 133. | 109. | 124. | 223. | 135. |
| Creatinine                                            | Amino acids related                     | 1    | 99   | 17   | 25   | 10   | 03   |
|                                                       |                                         | 80.6 | 155. | 90.0 | 49.4 | 191. | 109. |
| Creatinine                                            | Unknown                                 | 8    | 80   | 0    | 7    | 42   | 27   |
| Cysteine                                              | Amino acids                             | 4.35 | 4.37 | 4.22 | 4.35 | 5.20 | 7.60 |



|                                                 |                                         |        |      |      |      |      |      |
|-------------------------------------------------|-----------------------------------------|--------|------|------|------|------|------|
| Cytosine                                        | Nucleobases and related                 | 9.15   | 8.87 | 7.63 | 4.94 | 5.05 | 2.05 |
| Dehydroalanine                                  | Amino acids related                     | 6.02   | 4.74 | 3.60 | 3.88 | 4.28 | 5.56 |
| Deoxycholic acid                                | Complex lipids, fatty acids and related | 0.17   | 0.07 | 0.10 | 0.19 | 0.20 | 0.33 |
| Deoxycholic acid                                | Unknown                                 | 0.00   | 0.00 | 0.00 | 0.01 | 0.00 | 0.03 |
| dihomo-gamma-Linolenic acid (C20:cis[8,11,14]3) | Complex lipids, fatty acids and related | 0.43   | 0.25 | 0.20 | 0.58 | 1.04 | 2.76 |
| Dihydrocholesterol                              | Complex lipids, fatty acids and related | 0.97   | 1.45 | 1.57 | 0.96 | 1.16 | 2.76 |
| Eicoasenoic acid (C20:cis[11]1)                 | Complex lipids, fatty acids and related | 0.52   | 0.58 | 1.00 | 0.76 | 0.70 | 1.37 |
| Eicosadienoic acid (C20:2) No 01                | Complex lipids, fatty acids and related | 0.30   | 0.28 | 0.25 | 0.41 | 0.43 | 0.45 |
| Eicosadienoic acid (C20:2) No 02                | Complex lipids, fatty acids and related | 0.30   | 0.29 | 0.24 | 0.35 | 0.45 | 0.51 |
| Eicosaenoic acid (C20:1) No 02                  | Complex lipids, fatty acids and related | 0.32   | 0.16 | 0.18 | 0.28 | 0.48 | 0.44 |
| Eicosanoic acid (C20:0)                         | Complex lipids, fatty acids and related | 0.54   | 0.53 | 0.51 | 0.64 | 0.82 | 0.92 |
| epsilon-Acetyllysine                            | Unknown                                 | 4.17   | 4.33 | 5.55 | 5.29 | 5.29 | 8.96 |
| erythro-Dihydrosphingosine (d18:0)              | Complex lipids, fatty acids and related | 0.12   | 0.17 | 0.16 | 0.21 | 0.32 | 1.14 |
| Fucose                                          | Carbohydrates and related               | 36.7   | 6    | 8.26 | 4.32 | 5.22 | 2.51 |
| Fucosterol, total                               | Miscellaneous                           | 1.96   | 3.09 | 2.65 | 2.87 | 2.60 | 2.61 |
| Fumarate                                        | Energy metabolism and related           | 2.95   | 2.89 | 1.74 | 3.44 | 3.29 | 2.36 |
| Fumarate                                        | Unknown                                 | 0.37   | 0.54 | 0.60 | 0.42 | 0.42 | 0.73 |
| Galactose                                       | Carbohydrates and related               | 7.98   | 2.32 | 0.85 | 2.82 | 2.53 | 1.45 |
| Galactose, lipid fraction                       | Complex lipids, fatty acids and related | 1.42   | 1.85 | 1.88 | 2.59 | 1.62 | 1.90 |
| Galactose, lipid fraction                       | Complex lipids, fatty acids and related | 0.59   | 0.76 | 0.78 | 1.01 | 0.66 | 0.96 |
| gamma-Tocopherol                                | Vitamins, cofactors and related         | 0.56   | 0.47 | 0.32 | 0.62 | 0.64 | 0.75 |
| Glucose-1-phosphate                             | Carbohydrates and related               | 15.4   | 6    | 8.15 | 2.99 | 5.27 | 6.59 |
| Glucuronic acid                                 | Carbohydrates and related               | 470.20 | 7.79 | 4.44 | 7.12 | 1.58 | 1.49 |
| Glutamate                                       | Amino acids                             | 6.50   | 4    | 3.50 | 5.46 | 9.99 | 8.79 |
| Glutamic acid 2TMS ME (lipid)                   | Unknown                                 | 1.97   | 1.76 | 1.55 | 1.64 | 1.82 | 1.88 |
| Glutamine                                       | Amino acids                             | 13.5   | 16.9 | 1.83 | 3.82 | 3.61 | 4.11 |
| Glutarate                                       | Amino acids related                     | 8      | 6    | 0.34 | 0.20 | 0.32 | 0.46 |
| Glycerol phosphate, lipid fraction              | Complex lipids, fatty acids and related | 0.30   | 0.36 | 0.24 | 0.70 | 0.47 | 0.56 |
| Glycine                                         | Amino acids                             | 0.30   | 24.2 | 2    | 6.24 | 1.59 | 2.12 |
| Glycine, lipid fraction                         | Miscellaneous                           | 2.15   | 0.45 | 0.53 | 0.60 | 0.75 | 0.67 |
| Glycine, lipid fraction                         | Miscellaneous                           | 0.45   | 0.35 | 0.38 | 0.44 | 0.61 | 0.62 |
| Glycodeoxycholate                               | Unknown                                 | 0.35   | 0.46 | 0.33 | 0.35 | 0.45 | 0.26 |
| Glycolithocholic Acid                           | Unknown                                 | 0.46   | 0.20 | 0.13 | 0.06 | 0.56 | 0.09 |
| Heneicosanoic acid (C21:0)                      | Complex lipids, fatty acids and related | 0.20   | 0.33 | 0.34 | 0.31 | 0.41 | 0.50 |

|                                    |                                         |      |      |      |      |      |      |
|------------------------------------|-----------------------------------------|------|------|------|------|------|------|
| Heptacosanoic acid (C27:0)         | Complex lipids, fatty acids and related | 0.61 | 0.42 | 0.44 | 0.76 | 0.98 | 0.94 |
| Heptadecanoic acid (C17:0)         | Complex lipids, fatty acids and related | 0.18 | 0.17 | 0.18 | 0.23 | 0.30 | 0.64 |
| Hexadecanol                        | Complex lipids, fatty acids and related | 0.06 | 0.03 | 0.09 | 0.08 | 0.12 | 0.31 |
| Homoserine                         | Amino acids related                     | 0.77 | 3.28 | 3.07 | 0.55 | 0.38 | 0.59 |
| Hyochoholic acid                   | Complex lipids, fatty acids and related | 0.42 | 0.41 | 0.07 | 0.70 | 0.54 | 0.36 |
| Hyodeoxycholic acid                | Unknown                                 | 0.00 | 0.00 | 0.00 | 0.03 | 0.00 | 0.01 |
| Hyodeoxycholic acid                | Complex lipids, fatty acids and related | 0.11 | 0.08 | 0.25 | 0.10 | 0.28 | 0.92 |
| Hypoxanthine                       | Nucleobases and related                 | 26.5 | 21.0 |      |      |      |      |
|                                    |                                         | 3    | 9    | 9.06 | 2.27 | 1.29 | 1.45 |
|                                    |                                         |      |      |      | 12.3 |      | 10.6 |
| Indole-3-acetic acid               | Amino acids related                     | 3.06 | 0.11 | 0.28 | 3    | 5.43 | 4    |
| isoLCA                             | Unknown                                 | 0.00 | 0.00 | 0.01 | 0.01 | 0.00 | 0.02 |
|                                    |                                         |      | 51.3 | 43.3 |      |      |      |
| Isoleucine                         | Amino acids                             | 0.53 | 0    | 3    | 0.64 | 0.80 | 0.73 |
|                                    |                                         |      | 27.4 | 26.9 |      |      |      |
| Isoluecine + Leucine               | Unknown                                 | 0.31 | 6    | 2    | 0.34 | 0.40 | 0.61 |
|                                    | Complex lipids, fatty acids and related |      |      |      |      |      |      |
| Isopalmitic acid (C16:0)           |                                         | 0.27 | 0.14 | 0.07 | 0.16 | 0.36 | 0.91 |
| Kynurenic acid                     | Unknown                                 | 2.18 | 1.74 | 2.52 | 5.53 | 4.14 | 7.20 |
|                                    |                                         |      | 58.6 | 34.6 |      |      |      |
| Leucine                            | Amino acids                             | 0.43 | 7    | 5    | 0.47 | 0.66 | 0.57 |
|                                    | Complex lipids, fatty acids and related |      |      |      |      |      |      |
| Lignoceric acid (C24:0)            |                                         | 0.51 | 0.41 | 0.41 | 0.65 | 0.68 | 0.91 |
|                                    | Complex lipids, fatty acids and related |      |      |      |      |      |      |
| Linoleic acid (C18:cis[9,12]2)     |                                         | 4.61 | 6.28 | 5.81 | 5.27 | 6.96 | 6.75 |
|                                    | Complex lipids, fatty acids and related |      |      |      |      |      |      |
| Linolenic acid (C18:cis[9,12,15]3) |                                         | 4.49 | 5.88 | 5.29 | 5.33 | 6.28 | 4.97 |
| Lithocholic acid                   | Unknown                                 | 0.01 | 0.01 | 0.01 | 0.02 | 0.01 | 0.03 |
|                                    |                                         | 17.7 | 23.1 | 12.5 |      |      | 20.5 |
| Lysine                             | Amino acids                             | 8    | 9    | 0    | 6.07 | 4.28 | 0    |
|                                    | Carbohydrates and related               |      |      |      |      |      |      |
| Lyxose                             |                                         | 8.47 | 2.07 | 1.44 | 1.33 | 1.20 | 1.79 |
|                                    | Carbohydrates and related               |      |      |      |      |      |      |
| Mannose                            |                                         | 8.25 | 8.00 | 6.59 | 9.29 | 4.84 | 0.30 |
|                                    | Carbohydrates and related               |      |      |      |      |      |      |
| myo-Inositol                       |                                         | 61.6 | 144. | 57.9 |      |      |      |
|                                    |                                         | 6    | 72   | 1    | 6.94 | 3.44 | 0.97 |
|                                    | Complex lipids, fatty acids and related |      |      |      |      |      |      |
| Myristic acid (C14:0)              |                                         | 0.30 | 0.16 | 0.23 | 0.26 | 0.21 | 0.98 |
|                                    |                                         |      | 10.5 |      |      |      |      |
| N2-Acetylhistidine                 | Unknown                                 | 4.57 | 4    | 6.29 | 0.87 | 2.16 | 2.26 |
|                                    |                                         |      |      |      |      |      | 20.0 |
| N2-Acetyllysine                    | Amino acids related                     | 8.85 | 6.33 | 4.23 | 7.06 | 4.18 | 9    |
| N-Acetylglucosamine                | Unknown                                 | 0.08 | 0.07 | 0.05 | 0.26 | 0.52 | 0.32 |
| N-Acetyl-leucine                   | Unknown                                 | 4.15 | 2.81 | 9.62 | 2.13 | 0.68 | 1.15 |
|                                    | Complex lipids, fatty acids and related |      |      |      |      |      |      |
| Nervonic acid (C24:cis[15]1)       |                                         | 0.40 | 0.31 | 0.36 | 0.66 | 0.63 | 1.02 |
| Niacinamide (Nicotinamide)         | Unknown                                 | 0.25 | 0.49 | 0.25 | 0.85 | 1.64 | 0.90 |
| N-Methylglutamate                  | Unknown                                 | 0.03 | 0.02 | 0.05 | 0.11 | 0.10 | 0.17 |
| Norleucine                         | Miscellaneous                           | 0.21 | 0.30 | 0.30 | 0.27 | 0.18 | 0.27 |
|                                    | Complex lipids, fatty acids and related |      |      |      |      |      |      |
| Octadecadienoic acid No 01 (C18:2) |                                         | 0.49 | 0.55 | 0.58 | 0.65 | 1.36 | 1.40 |

|                                                         |                                         |      |      |      |      |      |      |
|---------------------------------------------------------|-----------------------------------------|------|------|------|------|------|------|
| Octadecanol                                             | Complex lipids, fatty acids and related | 0.06 | 0.04 | 0.13 | 0.11 | 0.23 | 0.31 |
| Oleic acid (C18:cis[9]1)                                | Complex lipids, fatty acids and related | 2.31 | 2.78 | 3.69 | 2.73 | 2.95 | 4.65 |
| omega-Muricholic acid                                   | Complex lipids, fatty acids and related | 0.28 | 0.17 | 0.08 | 0.62 | 0.53 | 0.34 |
| o-Muricholic Acid                                       | Unknown                                 | 0.01 | 0.00 | 0.01 | 0.28 | 0.08 | 0.08 |
| Ornithine                                               | Amino acids related                     | 8.75 | 40.8 | 25.0 | 1.35 | 1.34 | 1.57 |
| Palmitic acid (C16:0)                                   | Complex lipids, fatty acids and related | 0.71 | 0.55 | 0.82 | 1.04 | 0.58 | 1.32 |
| Pentacosanoic acid (C25:0)                              | Complex lipids, fatty acids and related | 0.44 | 0.44 | 0.29 | 0.55 | 0.80 | 0.78 |
| Pentadecanol                                            | Complex lipids, fatty acids and related | 0.32 | 0.34 | 0.37 | 0.40 | 0.38 | 0.80 |
| Phenylalanine                                           | Amino acids                             | 0.76 | 73.3 | 45.4 | 1.12 | 1.46 | 1.38 |
| Phenylalanine                                           | Unknown                                 | 2.34 | 4    | 8    | 1.16 | 1.41 | 1.22 |
| Phenylalanine                                           | Unknown                                 | 0.39 | 57.5 | 27.3 | 0.79 | 0.79 | 0.95 |
| Phenylalanine                                           | Unknown                                 | 0.41 | 0    | 5    | 0.66 | 0.85 | 1.22 |
| Phosphate, lipid fraction                               | Complex lipids, fatty acids and related | 0.40 | 44.0 | 28.2 | 0.55 | 0.53 | 0.74 |
| Phosphoenolpyruvate (PEP)                               | Energy metabolism and related           | 4.12 | 7    | 1    | 3.02 | 3.15 | 3.08 |
| p-Hydroxybenzoic acid                                   | Vitamins, cofactors and related         | 0.20 | 45.4 | 33.2 | 0.29 | 0.70 | 0.41 |
| Pipecolic acid                                          | Unknown                                 | 0.14 | 6    | 5    | 0.96 | 0.63 | 1.29 |
| plausible 18:2-Lyso PC (Na-Addukt)                      | Unknown                                 | 2.22 | 0.32 | 0.24 | 5.08 | 1.97 | 1.55 |
| plausible 2-Hydroxyarachidic acid (2-OH-C20:0) TMS ME   | Unknown                                 | 0.20 | 0.12 | 0.07 | 0.45 | 0.67 | 0.98 |
| plausible 2-Hydroxytricosanoic acid (2-OH-C23:0) TMS ME | Unknown                                 | 0.27 | 0.21 | 0.24 | 0.56 | 0.77 | 0.85 |
| plausible Heptadecanol TMS                              | Unknown                                 | 0.01 | 0.28 | 0.27 | 0.01 | 0.30 | 0.29 |
| plausible SalzCluster (C7H10O8Na3(35)Cl(37)Cl)          | Unknown                                 | 0.61 | 0.01 | 0.03 | 0.76 | 0.76 | 1.01 |
| plausible SM (d18:1, C16:0) Na-Addukt                   | Unknown                                 | 6.19 | 0.51 | 0.50 | 7.05 | 3.76 | 3.72 |
| proposed Sphingomyelin (d18:2,C16:0)                    | Unknown                                 | 4.06 | 2.96 | 2.44 | 5.79 | 2.87 | 3.11 |
| putative 12-Methylmyristic acid TMS                     | Unknown                                 | 0.01 | 2.22 | 2.80 | 0.02 | 0.03 | 0.71 |
| putative 2-Oxobutanedioic acid hexoside 6TMS            | Unknown                                 | 0.31 | 0.02 | 0.02 | 2.14 | 2.01 | 1.06 |
| putative Anhydroglucuronate 4TMS                        | Unknown                                 | 12.7 | 0.27 | 0.15 | 4.17 | 5.94 | 3.24 |
| putative Bis-(glycerol)-phosphate                       | Unknown                                 | 0.08 | 7.39 | 2.62 | 0.08 | 0.15 | 2.19 |
| putative Choline plasmalogen (C36:2)                    | Unknown                                 | 7.41 | 0.10 | 0.06 | 6.63 | 1.63 | 2.22 |
| putative Deoxycholyglycine deriv #1                     | Unknown                                 | 0.01 | 0.02 | 0.01 | 0.03 | 0.02 | 0.10 |
| putative Hydroxy-eicosan OTMS                           | Unknown                                 | 0.15 | 0.02 | 0.01 | 0.15 | 0.27 | 0.32 |
| putative Hyodeoxycholic acid 3TMS                       | Unknown                                 | 0.03 | 0.11 | 0.12 | 0.05 | 0.03 | 0.08 |
| putative Lithocholic acid OTMS ME                       | Unknown                                 | 0.01 | 0.04 | 0.08 | 0.02 | 0.01 | 0.05 |
| putative Tetracosenoic acid ME                          | Unknown                                 | 0.39 | 0.01 | 0.01 | 0.40 | 0.83 | 0.71 |
| Putrescine                                              | Miscellaneous                           | 11.6 | 0.28 | 0.20 | 43.9 | 39.6 | 18.1 |
|                                                         |                                         | 8    | 0.39 | 0.20 | 6    | 5    | 2    |

|                                    |                                         |        |         |         |         |        |       |
|------------------------------------|-----------------------------------------|--------|---------|---------|---------|--------|-------|
| Pyruvate                           | Energy metabolism and related           | 3.88   | 3.33    | 3.19    | 2.45    | 2.05   | 2.20  |
| ribo-4-Hydroxy-8E-sphingenine      | Complex lipids, fatty acids and related | 0.53   | 0.59    | 0.82    | 1.06    | 1.04   | 2.01  |
| Sarcosine                          | Amino acids related                     | 0.59   | 0.76    | 0.61    | 0.89    | 0.78   | 0.91  |
| scyllo-Inositol                    | Carbohydrates and related               | 14.3   | 29.2    | 33.5    | 10.3    | 8.54   | 2.19  |
| Serine, lipid fraction             | Miscellaneous                           | 0.56   | 0.53    | 0.50    | 0.66    | 0.59   | 1.08  |
| Serine, lipid fraction             | Miscellaneous                           | 0.56   | 0.52    | 0.43    | 0.67    | 0.51   | 1.03  |
| Shikimic acid                      | Miscellaneous                           | 911.27 | 1238.06 | 1542.15 | 2535.91 | 937.46 | 3.07  |
| Stearic acid (C18:0)               | Complex lipids, fatty acids and related | 0.59   | 0.44    | 0.44    | 0.74    | 0.55   | 0.72  |
| Stigmasterol, total                | Miscellaneous                           | 1.82   | 2.79    | 2.89    | 2.67    | 2.38   | 2.92  |
| Taurine                            | Unknown                                 | 3.84   | 8.87    | 8.09    | 0       | 7      | 3     |
| Tauro-b-muricholic Acid            | Unknown                                 | 6.80   | 4.47    | 2.27    | 2.02    | 1.59   | 1.73  |
| Taurochenodeoxycholate             | Unknown                                 | 1.65   | 1.94    | 1.95    | 1.63    | 1.18   | 1.87  |
| Taurocholic acid                   | Unknown                                 | 2.99   | 3.73    | 3.64    | 1.68    | 1.35   | 2.43  |
| Taurocholic Acid 3-sulfate         | Unknown                                 | 395.06 | 302.06  | 28.52   | 139.94  | 156.93 | 16.82 |
| Taurocholic acid sodium salt       | Unknown                                 | 8.10   | 6.65    | 5.78    | 3.83    | 2.12   | 2.46  |
| Taurodeoxycholate                  | Unknown                                 | 0.54   | 0.46    | 0.49    | 0.55    | 0.48   | 0.46  |
| Taurolithocholic Acid              | Unknown                                 | 0.03   | 0.02    | 0.01    | 0.20    | 0.03   | 0.40  |
| Tetradecanol                       | Complex lipids, fatty acids and related | 0.12   | 0.07    | 0.07    | 0.17    | 0.12   | 0.23  |
| Thiamine (Vitamin B1)              | Unknown                                 | 0.17   | 0.17    | 0.17    | 0.20    | 0.20   | 0.84  |
| threo-Sphinganine 3TMS             | Unknown                                 | 0.09   | 0.13    | 0.08    | 0.30    | 0.29   | 2.80  |
| trans-4-Hydroxyproline             | Amino acids related                     | 16.0   | 43.6    | 1.88    | 9       | 2      | 2.92  |
| trans-Ferulic acid                 | Miscellaneous                           | 11.4   | 7       | 6.67    | 9.87    | 6.69   | 2.46  |
| trans-Ferulic acid, lipid fraction |                                         | 0.68   | 0.44    | 0.88    | 0.78    | 0.70   | 1.04  |
| trans-Sinapic acid                 | Miscellaneous                           | 29.9   | 24.0    | 23.5    | 17.5    | 8.25   | 4.22  |
| Tricosanoic acid (C23:0)           | Complex lipids, fatty acids and related | 0.38   | 0.44    | 0.37    | 0.63    | 0.82   | 0.92  |
| Tryptophan                         | Amino acids                             | 59.5   | 90.2    | 59.4    | 2.53    | 1.56   | 2.57  |
| Tyramine                           | Amino acids related                     | 150.42 | 340.94  | 198.95  | 7.30    | 7.00   | 9     |
| Tyrosine                           | Unknown                                 | 0.21   | 0.60    | 0.43    | 0.25    | 0.29   | 0.61  |
| Ubichinone-30 (Coenzyme Q6)        | Unknown                                 | 0.59   | 0.60    | 0.51    | 0.96    | 0.79   | 0.96  |
| Ubichinone-35 (Coenzyme Q7)        | Unknown                                 | 0.51   | 0.58    | 0.53    | 0.94    | 0.76   | 1.14  |
| Ubichinone-45 (Coenzyme Q9)        | Unknown                                 | 0.57   | 0.59    | 0.53    | 0.97    | 0.75   | 0.96  |
| Unknown lipid MB (828450473)       | Unknown                                 | 3.39   | 3.22    | 2.84    | 4.77    | 3.01   | 2.71  |
| Unknown lipid MB (828450676)       | Unknown                                 | 0.70   | 0.82    | 0.77    | 0.79    | 0.87   | 0.81  |
| Unknown lipid MB (828450834)       | Unknown                                 | 0.27   | 0.23    | 0.17    | 0.53    | 0.71   | 0.88  |
| Unknown lipid MB (828451241)       | Unknown                                 | 0.06   | 0.13    | 0.16    | 0.08    | 0.11   | 0.86  |
| Unknown lipid MB (828451259)       | Unknown                                 | 0.48   | 0.23    | 0.25    | 0.72    | 0.95   | 0.91  |
| Unknown lipid MB (828451275)       | Unknown                                 | 0.36   | 0.32    | 0.45    | 0.40    | 0.33   | 0.24  |
| Unknown lipid MB (828451312)       | Unknown                                 | 0.31   | 0.30    | 0.39    | 1.46    | 0.35   | 1.07  |
| Unknown lipid MB (828451316)       | Unknown                                 | 0.35   | 0.58    | 0.49    | 3.93    | 3.60   | 1.48  |

|                                      |         |      |      |      |      |      |      |
|--------------------------------------|---------|------|------|------|------|------|------|
| Unknown lipid MB (828451380)         | Unknown | 0.55 | 0.44 | 0.28 | 0.60 | 1.05 | 0.93 |
| Unknown lipid MB (828451443)         | Unknown | 0.48 | 0.63 | 0.72 | 0.93 | 0.78 | 0.98 |
| Unknown lipid MB (828451444)         | Unknown | 0.59 | 0.39 | 0.26 | 0.72 | 1.04 | 1.10 |
| Unknown lipid MB (828451445)         | Unknown | 0.20 | 0.15 | 0.21 | 0.28 | 0.28 | 0.71 |
| Unknown lipid MB (828451931)         | Unknown | 0.00 | 0.00 | 0.01 | 0.01 | 0.60 | 0.36 |
| Unknown lipid MB (828451933)         | Unknown | 0.06 | 0.14 | 0.13 | 0.15 | 0.11 | 0.68 |
| Unknown lipid MB (828451937)         | Unknown | 0.00 | 0.00 | 0.02 | 0.02 | 0.44 | 0.31 |
| Unknown lipid MB (828451940)         | Unknown | 0.00 | 0.00 | 0.01 | 0.01 | 0.25 | 0.27 |
| Unknown lipid MB (828452038)         | Unknown | 0.01 | 0.01 | 0.01 | 0.01 | 0.01 | 1.53 |
| Unknown lipid MB (828452040)         | Unknown | 0.02 | 0.09 | 0.06 | 0.13 | 0.27 | 1.10 |
| Unknown lipid MB (828452041)         | Unknown | 0.03 | 0.04 | 0.05 | 0.03 | 0.31 | 0.31 |
| Unknown lipid MB (828452042)         | Unknown | 0.01 | 0.01 | 0.00 | 0.01 | 0.01 | 0.01 |
| Unknown lipid MB (828452043)         | Unknown | 0.01 | 0.01 | 0.01 | 0.02 | 0.34 | 0.13 |
| Unknown lipid MB (828452047)         | Unknown | 0.00 | 0.00 | 0.02 | 0.02 | 0.45 | 0.32 |
| Unknown lipid MB (828452048)         | Unknown | 0.68 | 0.54 | 0.38 | 0.76 | 0.92 | 0.81 |
| Unknown lipid MB (828452050)         | Unknown | 0.02 | 0.05 | 0.04 | 0.04 | 0.42 | 0.55 |
| Unknown lipid MB (828452058)         | Unknown | 0.08 | 0.07 | 0.07 | 0.08 | 0.11 | 0.21 |
| Unknown lipid MB (828452059)         | Unknown | 0.17 | 0.10 | 0.05 | 0.58 | 0.16 | 0.16 |
| Unknown lipid MB (828452060)         | Unknown | 0.01 | 0.00 | 0.00 | 0.01 | 0.00 | 0.04 |
|                                      |         | 12.6 |      |      |      |      |      |
| Unknown lipid MB ESI neg (858450013) | Unknown | 0.64 | 2    | 9.52 | 1.03 | 1.03 | 0.86 |
| Unknown lipid MB ESI neg (858450034) | Unknown | 0.22 | 0.54 | 0.06 | 0.48 | 0.85 | 0.17 |
| Unknown lipid MB ESI neg (858450042) | Unknown | 0.30 | 0.24 | 0.23 | 1.97 | 2.11 | 3.03 |
| Unknown lipid MB ESI neg (858450047) | Unknown | 6.89 | 9.37 | 4.62 | 2.24 | 1.50 | 1.54 |
| Unknown lipid MB ESI neg (858450065) | Unknown | 0.02 | 0.03 | 0.01 | 0.09 | 0.07 | 0.07 |
| Unknown lipid MB ESI neg (858450068) | Unknown | 0.25 | 0.33 | 0.25 | 0.37 | 0.68 | 0.62 |
| Unknown lipid MB ESI neg (858450071) | Unknown | 4.39 | 4.98 | 3.30 | 4.29 | 2.68 | 2.86 |
| Unknown lipid MB ESI pos (848450056) | Unknown | 5.12 | 3.81 | 4.99 | 5.45 | 3.54 | 2.30 |
| Unknown lipid MB ESI pos (848450067) | Unknown | 2.29 | 2.61 | 3.03 | 3.38 | 2.32 | 2.26 |
| Unknown lipid MB ESI pos (848450068) | Unknown | 3.71 | 2.67 | 2.23 | 4.74 | 1.72 | 1.46 |
| Unknown lipid MB ESI pos (848450069) | Unknown | 5.82 | 1.92 | 2.50 | 5.53 | 1.46 | 1.49 |
| Unknown lipid MB ESI pos (848450083) | Unknown | 5.80 | 3.39 | 1.25 | 6.72 | 2.75 | 1.58 |
| Unknown lipid MB ESI pos (848450092) | Unknown | 0.28 | 0.26 | 0.37 | 0.55 | 0.38 | 0.48 |
| Unknown lipid MB ESI pos (848450093) | Unknown | 0.21 | 0.22 | 0.48 | 0.57 | 0.68 | 0.88 |
| Unknown lipid MB ESI pos (848450095) | Unknown | 0.48 | 0.43 | 0.79 | 0.74 | 0.50 | 0.77 |
| Unknown lipid MB ESI pos (848450096) | Unknown | 2.04 | 1.66 | 2.21 | 3.90 | 1.94 | 3.16 |
| Unknown lipid MB ESI pos (848450097) | Unknown | 6.50 | 6.70 | 5.20 | 7.12 | 3.98 | 3.18 |
| Unknown lipid MB ESI pos (848450100) | Unknown | 4.46 | 1.85 | 1.32 | 4.19 | 1.49 | 1.48 |
| Unknown lipid MB ESI pos (848450102) | Unknown | 4.76 | 2.89 | 2.78 | 6.85 | 2.33 | 1.73 |
| Unknown lipid MB ESI pos (848450103) | Unknown | 5.03 | 3.00 | 2.21 | 6.47 | 2.24 | 1.64 |
|                                      |         | 11.7 |      |      |      |      |      |
| Unknown lipid MB ESI pos (848450105) | Unknown | 2    | 6.54 | 6.28 | 9    | 4.98 | 3.71 |
| Unknown lipid MB ESI pos (848450106) | Unknown | 7.14 | 3.23 | 1.72 | 6.65 | 2.40 | 1.57 |
| Unknown lipid MB ESI pos (848450107) | Unknown | 2.94 | 2.05 | 2.36 | 3.59 | 1.76 | 1.86 |
| Unknown lipid MB ESI pos (848450108) | Unknown | 6.62 | 3.63 | 4.70 | 6.99 | 2.38 | 3.25 |
| Unknown lipid MB ESI pos (848450109) | Unknown | 5.68 | 1.74 | 2.56 | 6.35 | 1.97 | 2.71 |
|                                      |         | 10.5 |      |      |      |      |      |
| Unknown lipid MB ESI pos (848450110) | Unknown | 6    | 3.15 | 2.06 | 9.35 | 2.82 | 1.92 |
| Unknown lipid MB ESI pos (848450111) | Unknown | 2.91 | 2.92 | 3.14 | 3.70 | 3.33 | 3.74 |
| Unknown lipid MB ESI pos (848450112) | Unknown | 4.88 | 2.55 | 2.62 | 5.41 | 1.38 | 2.54 |

|                                      |         |      |      |      |      |      |      |
|--------------------------------------|---------|------|------|------|------|------|------|
| Unknown lipid MB ESI pos (848450113) | Unknown | 5.68 | 5.03 | 5.22 | 7.79 | 4.49 | 6.13 |
|                                      |         |      |      |      | 10.5 |      |      |
| Unknown lipid MB ESI pos (848450114) | Unknown | 8.85 | 4.78 | 4.39 | 1    | 2.13 | 3.53 |
| Unknown lipid MB ESI pos (848450123) | Unknown | 2.76 | 1.62 | 1.38 | 5.98 | 1.89 | 1.29 |
| Unknown lipid MB ESI pos (848450129) | Unknown | 3.09 | 2.43 | 1.56 | 4.66 | 2.73 | 2.96 |
| Unknown lipid MB ESI pos (848450131) | Unknown | 5.98 | 4.07 | 2.97 | 9.41 | 4.28 | 3.37 |
| Unknown lipid MB ESI pos (848450132) | Unknown | 5.35 | 2.86 | 1.66 | 8.51 | 3.52 | 2.74 |
| Unknown lipid MB ESI pos (848450138) | Unknown | 4.60 | 2.89 | 1.63 | 6.34 | 3.26 | 2.09 |
| Unknown lipid MB ESI pos (848450139) | Unknown | 7.32 | 6.01 | 1.91 | 5.91 | 2.13 | 1.20 |
| Unknown lipid MB ESI pos (848450142) | Unknown | 8.25 | 8.05 | 2.30 | 7.06 | 2.69 | 1.11 |
| Unknown lipid MB ESI pos (848450144) | Unknown | 4.24 | 3.20 | 1.80 | 5.35 | 3.16 | 2.48 |
| Unknown lipid MB ESI pos (848450146) | Unknown | 4.02 | 4.08 | 2.14 | 6.14 | 3.92 | 2.38 |
| Unknown lipid MB ESI pos (848450147) | Unknown | 2.09 | 1.66 | 1.34 | 2.68 | 2.61 | 1.63 |
| Unknown lipid MB ESI pos (848450148) | Unknown | 5.52 | 4.00 | 2.62 | 7.65 | 4.98 | 3.14 |
| Unknown lipid MB ESI pos (848450152) | Unknown | 2.77 | 2.35 | 1.08 | 4.72 | 2.75 | 2.07 |
| Unknown lipid MB ESI pos (848450154) | Unknown | 0.45 | 0.30 | 0.14 | 1.08 | 1.64 | 0.55 |
| Unknown lipid MB ESI pos (848450155) | Unknown | 0.58 | 0.41 | 0.25 | 1.82 | 1.59 | 1.85 |
| Unknown lipid MB ESI pos (848450159) | Unknown | 0.58 | 0.39 | 0.37 | 0.93 | 1.96 | 2.07 |
|                                      |         | 14.9 | 16.9 | 10.9 | 11.6 | 14.3 |      |
| Unknown lipid MB ESI pos (848450196) | Unknown | 5    | 3    | 7    | 6    | 3    | 9.58 |
|                                      |         | 10.7 | 14.6 |      |      | 13.6 |      |
| Unknown lipid MB ESI pos (848450201) | Unknown | 9    | 9    | 9.71 | 8.49 | 8    | 8.42 |
| Unknown lipid MB ESI pos (848450202) | Unknown | 3.83 | 4.57 | 4.69 | 3.68 | 4.88 | 4.15 |
|                                      |         | 14.2 | 20.7 | 10.3 | 13.0 | 17.5 |      |
| Unknown lipid MB ESI pos (848450204) | Unknown | 4    | 3    | 7    | 5    | 1    | 9.98 |
|                                      |         | 13.6 | 13.7 | 10.1 | 11.7 | 11.5 |      |
| Unknown lipid MB ESI pos (848450205) | Unknown | 3    | 0    | 0    | 8    | 7    | 8.38 |
|                                      |         | 15.5 | 31.0 | 15.4 | 13.3 | 27.5 | 14.3 |
| Unknown lipid MB ESI pos (848450206) | Unknown | 0    | 4    | 7    | 5    | 2    | 8    |
|                                      |         | 15.9 | 24.5 | 14.3 | 12.7 | 20.6 | 12.6 |
| Unknown lipid MB ESI pos (848450207) | Unknown | 6    | 0    | 3    | 3    | 2    | 4    |
|                                      |         | 13.2 | 20.2 | 12.4 | 12.2 | 20.9 |      |
| Unknown lipid MB ESI pos (848450208) | Unknown | 7    | 4    | 7    | 3    | 1    | 9.40 |
| Unknown lipid MB ESI pos (848450209) | Unknown | 8.46 | 9.92 | 8.19 | 7.93 | 9.65 | 7.07 |
|                                      |         | 10.7 | 13.4 | 11.6 | 10.2 | 11.4 |      |
| Unknown lipid MB ESI pos (848450210) | Unknown | 7    | 9    | 9    | 6    | 7    | 9.68 |
|                                      |         |      | 15.8 |      |      | 13.8 |      |
| Unknown lipid MB ESI pos (848450212) | Unknown | 8.59 | 0    | 7.01 | 8.58 | 6    | 7.07 |
|                                      |         | 12.1 | 16.3 |      | 11.2 | 13.6 |      |
| Unknown lipid MB ESI pos (848450213) | Unknown | 3    | 0    | 9.95 | 4    | 2    | 8.62 |
|                                      |         |      | 16.9 |      |      | 17.0 |      |
| Unknown lipid MB ESI pos (848450214) | Unknown | 9.87 | 4    | 7.73 | 9.64 | 0    | 7.56 |
|                                      |         | 13.2 | 24.2 | 11.3 | 11.6 | 19.1 |      |
| Unknown lipid MB ESI pos (848450215) | Unknown | 4    | 4    | 8    | 3    | 8    | 8.54 |
|                                      |         | 10.8 | 13.6 |      |      | 11.4 |      |
| Unknown lipid MB ESI pos (848450216) | Unknown | 0    | 2    | 8.49 | 9.93 | 1    | 7.88 |
|                                      |         | 12.7 | 18.0 | 11.0 | 11.8 | 16.7 |      |
| Unknown lipid MB ESI pos (848450218) | Unknown | 4    | 0    | 1    | 9    | 3    | 7.93 |
|                                      |         |      | 14.2 | 10.4 |      | 11.3 |      |
| Unknown lipid MB ESI pos (848450219) | Unknown | 9.23 | 0    | 5    | 9.33 | 8    | 8.03 |
| Unknown polar MB (838450146)         | Unknown | 7.98 | 2.66 | 2.19 | 2.18 | 2.43 | 1.27 |
| Unknown polar MB (838450566)         | Unknown | 0.39 | 0.32 | 0.38 | 1.26 | 0.87 | 1.18 |
|                                      |         |      |      |      |      |      | 26.5 |
| Unknown polar MB (838450590)         | Unknown | 0.85 | 0.26 | 0.36 | 1.25 | 0.54 | 3    |



|                              |         |      |      |      |      |      |      |
|------------------------------|---------|------|------|------|------|------|------|
| Unknown polar MB (838450621) | Unknown | 5.66 | 6.59 | 5.59 | 7.14 | 6.17 | 1.54 |
| Unknown polar MB (838450677) | Unknown | 0.89 | 0.40 | 0.50 | 0.75 | 0.66 | 0.63 |
| Unknown polar MB (838450692) | Unknown | 0.14 | 0.08 | 0.06 | 0.17 | 0.24 | 0.23 |
| Unknown polar MB (838450807) | Unknown | 2.21 | 0.98 | 1.42 | 2.15 | 1.29 | 2.66 |
| Unknown polar MB (838450816) | Unknown | 0.01 | 0.01 | 0.00 | 0.02 | 0.01 | 0.01 |
| Unknown polar MB (838451614) | Unknown | 0.02 | 0.01 | 0.01 | 0.02 | 0.01 | 0.01 |
| Unknown polar MB (838452021) | Unknown | 0.37 | 0.34 | 0.34 | 0.47 | 0.60 | 0.64 |
| Unknown polar MB (838452022) | Unknown | 2.07 | 1.60 | 1.44 | 1.59 | 1.61 | 1.34 |
| Unknown polar MB (838452079) | Unknown | 4.98 | 2.38 | 4.03 | 3.05 | 1.61 | 3.23 |
| Unknown polar MB (838452178) | Unknown | 0.10 | 0.07 | 0.14 | 0.10 | 0.22 | 0.77 |
| Unknown polar MB (838452196) | Unknown | 2.85 | 3.16 | 2.68 | 2.22 | 1.83 | 1.60 |
|                              |         | 36.8 | 25.0 | 38.2 | 208. | 241. | 118. |
| Unknown polar MB (838452482) | Unknown | 9    | 6    | 6    | 70   | 92   | 91   |
| Unknown polar MB (838452804) | Unknown | 4.65 | 2.01 | 2.10 | 1.16 | 0.46 | 1.94 |
|                              |         |      |      | 13.5 | 34.8 | 41.3 | 10.0 |
| Unknown polar MB (838452999) | Unknown | 1.35 | 6.79 | 9    | 6    | 0    | 1    |
| Unknown polar MB (838453005) | Unknown | 0.26 | 0.09 | 0.15 | 0.07 | 0.11 | 0.32 |
| Unknown polar MB (838453006) | Unknown | 0.30 | 0.14 | 0.22 | 0.09 | 0.15 | 0.30 |
| Unknown polar MB (838453007) | Unknown | 0.10 | 0.16 | 0.14 | 0.17 | 0.31 | 0.25 |
| Unknown polar MB (838453008) | Unknown | 0.34 | 0.68 | 0.51 | 1.19 | 0.95 | 1.44 |
| Unknown polar MB (838453009) | Unknown | 0.02 | 0.03 | 0.01 | 0.03 | 0.03 | 0.02 |
| Unknown polar MB (838453011) | Unknown | 1.13 | 0.27 | 0.23 | 1.29 | 0.43 | 0.69 |
|                              |         | 34.4 | 96.7 | 33.3 | 143. | 120. | 66.6 |
| Unknown polar MB (838453012) | Unknown | 3    | 1    | 3    | 00   | 51   | 1    |
| Unknown polar MB (838453014) | Unknown | 0.51 | 0.53 | 0.39 | 0.77 | 0.80 | 1.44 |
| Unknown polar MB (838453015) | Unknown | 0.13 | 0.19 | 0.24 | 0.22 | 0.27 | 0.85 |
| Unknown polar MB (838453017) | Unknown | 0.11 | 0.03 | 0.07 | 0.19 | 0.23 | 0.31 |
| Unknown polar MB (838453018) | Unknown | 0.07 | 0.04 | 0.05 | 0.12 | 0.36 | 0.33 |
| Unknown polar MB (838453019) | Unknown | 0.05 | 0.05 | 0.02 | 0.08 | 0.06 | 0.03 |
| Unknown polar MB (838453026) | Unknown | 0.18 | 0.07 | 0.05 | 0.29 | 0.12 | 0.14 |
| Unknown polar MB (838453028) | Unknown | 0.13 | 0.05 | 0.03 | 0.08 | 0.08 | 0.44 |
| Unknown polar MB (838453029) | Unknown | 0.10 | 0.05 | 0.08 | 0.10 | 0.09 | 0.35 |
| Unknown polar MB (838453030) | Unknown | 0.36 | 0.07 | 0.04 | 0.36 | 0.16 | 0.30 |
| Unknown polar MB (838453031) | Unknown | 0.00 | 0.00 | 0.01 | 0.01 | 0.01 | 0.24 |
| Unknown polar MB (838453033) | Unknown | 0.07 | 0.04 | 0.02 | 0.09 | 0.06 | 0.23 |
| Unknown polar MB (838453035) | Unknown | 0.19 | 0.03 | 0.01 | 0.10 | 0.05 | 0.07 |
| Unknown polar MB (838453036) | Unknown | 0.26 | 0.08 | 0.02 | 0.11 | 0.09 | 0.07 |
| Unknown polar MB (838453039) | Unknown | 0.03 | 0.02 | 0.02 | 0.10 | 0.04 | 0.07 |
| Unknown polar MB (838453040) | Unknown | 0.08 | 0.03 | 0.03 | 0.20 | 0.07 | 0.20 |
| Unknown polar MB (838453041) | Unknown | 0.13 | 0.12 | 0.18 | 0.19 | 0.15 | 0.61 |
| Unknown polar MB (838453043) | Unknown | 0.06 | 0.02 | 0.06 | 0.06 | 0.05 | 0.08 |
| Unknown polar MB (838453044) | Unknown | 0.19 | 0.13 | 0.18 | 0.25 | 0.35 | 0.86 |
| Unknown polar MB (838453045) | Unknown | 0.28 | 0.12 | 0.04 | 0.46 | 0.35 | 0.19 |
| Unknown polar MB (838453047) | Unknown | 0.13 | 0.08 | 0.10 | 0.18 | 0.14 | 0.72 |
| Unknown polar MB (838453050) | Unknown | 1.00 | 0.16 | 0.05 | 1.15 | 0.82 | 0.56 |
| Unknown polar MB (838453051) | Unknown | 0.29 | 0.37 | 0.36 | 0.37 | 0.58 | 0.67 |
| Unknown polar MB (838453052) | Unknown | 0.22 | 0.07 | 0.12 | 0.23 | 0.26 | 0.37 |
| Unknown polar MB (838453053) | Unknown | 0.25 | 0.10 | 0.13 | 0.31 | 0.24 | 0.44 |
| Unknown polar MB (838453056) | Unknown | 0.34 | 0.10 | 0.13 | 0.36 | 0.35 | 0.35 |
| Unknown polar MB (838453057) | Unknown | 0.35 | 0.11 | 0.18 | 0.28 | 0.31 | 0.58 |

|                                      |                           |             |             |             |             |             |             |
|--------------------------------------|---------------------------|-------------|-------------|-------------|-------------|-------------|-------------|
| Unknown polar MB (838453058)         | Unknown                   | 0.31        | 0.10        | 0.07        | 0.78        | 0.26        | 0.18        |
| Unknown polar MB (838453059)         | Unknown                   | <b>2.60</b> | <b>2.50</b> | <b>2.69</b> | <b>3.02</b> | 2.30        | <b>2.86</b> |
| Unknown polar MB (838453062)         | Unknown                   | 0.41        | 0.45        | 0.51        | 0.50        | 0.75        | 0.81        |
| Unknown polar MB (838453063)         | Unknown                   | 0.27        | 0.04        | 0.02        | 0.60        | 0.22        | 0.22        |
| Unknown polar MB (838453064)         | Unknown                   | 0.18        | 0.07        | 0.05        | 0.21        | 0.11        | 0.11        |
| Unknown polar MB (838453066)         | Unknown                   | 0.01        | 0.01        | 0.01        | 0.01        | 0.01        | 0.68        |
| Unknown polar MB (838453067)         | Unknown                   | <b>2.20</b> | <b>2.27</b> | <b>2.64</b> | <b>3.08</b> | <b>2.23</b> | 1.83        |
| Unknown polar MB ESI neg (878450071) | Unknown                   | <b>3.16</b> | 2.62        | <b>3.26</b> | <b>3.48</b> | 1.78        | <b>1.85</b> |
| Unknown polar MB ESI pos (868450018) | Unknown                   | 0.35        | 0.35        | 0.45        | 0.16        | 0.27        | 0.45        |
| Unknown polar MB ESI pos (868450034) | Unknown                   | 0.33        | <b>1.98</b> | <b>3.07</b> | 0.33        | 0.38        | 0.38        |
| Unknown polar MB ESI pos (868450040) | Unknown                   | <b>4.89</b> | <b>9.87</b> | <b>5.61</b> | 1.54        | 2.06        | 1.85        |
| Uric acid                            | Nucleobases and related   | <b>11.7</b> | <b>9</b>    | <b>4.80</b> | 2.76        | 0.55        | 1.04        |
| Valine                               | Amino acids               | 0.48        | <b>45.6</b> | <b>44.7</b> | 0.64        | 0.83        | 1.01        |
| Valine TMS ME                        | Unknown                   | 0.61        | <b>2.58</b> | <b>2.48</b> | 0.84        | 0.86        | 0.99        |
| Valine, lipid fraction               | Miscellaneous             | 0.56        | <b>2.13</b> | <b>1.90</b> | 0.82        | 0.83        | 0.86        |
| Xanthine                             | Nucleobases and related   | <b>63.9</b> | <b>37.2</b> | <b>21.1</b> | 0.29        | 0.42        | 0.74        |
| Xanthurenic acid                     | Amino acids related       | 0.08        | 0.06        | 0.11        | 0.08        | 0.19        | 0.26        |
| Xylose                               | Carbohydrates and related | <b>13.5</b> | <b>10.4</b> | <b>13.4</b> |             |             |             |
|                                      |                           | <b>8</b>    | <b>9</b>    | <b>2</b>    | <b>2.44</b> | 1.74        | 2.34        |

**Table S4:** Doripenem-induced feces metabolite fold changes in male (m) Wistar rats (N=5 per group) dosed with 100 (LD) and 300 (HD) mg/kg bw/day for 7, 14 and 28 days (m7, m14 and m28). Statistically significant changes (Welch-t-test; p-value < 0.05) are shown in bold numbers where red boxes mean a significant increase in the respective fecal metabolites and yellow a significant reduction compared to control levels.

| Metabolite                        | Class                                   | Doripenem HD |             |             | Doripenem LD |             |             |
|-----------------------------------|-----------------------------------------|--------------|-------------|-------------|--------------|-------------|-------------|
|                                   |                                         | m7           | m14         | m28         | m7           | m14         | m28         |
| 1,25-Dihydroxy-vitamin D3         | Unknown                                 | 0.74         | 0.32        | 0.37        | 0.71         | 0.78        | 0.91        |
| 1,2-Anhydroribose                 | Carbohydrates and related               | <b>7.45</b>  | <b>3.90</b> | <b>7.11</b> | <b>5.46</b>  | <b>4.35</b> | <b>6.14</b> |
| 1,4-Hydroquinone                  | Miscellaneous                           | <b>3.06</b>  | <b>2.62</b> | <b>1.93</b> | <b>1.53</b>  | 1.27        | 1.20        |
| 14-Methylhexadecanoic acid        | Complex lipids, fatty acids and related | 0.34         | 0.15        | 0.30        | 0.31         | 0.34        | 0.36        |
| 15-Methylhexadecanoic acid        | Complex lipids, fatty acids and related | 0.33         | 0.25        | 0.33        | 0.24         | 0.31        | 0.28        |
| 16-Methylheptadecanoic acid       | Complex lipids, fatty acids and related | 0.69         | 0.28        | 0.43        | 0.49         | 0.59        | 0.50        |
| 17-Methyloctadecanoic acid        | Complex lipids, fatty acids and related | 0.67         | 0.37        | 0.52        | 0.61         | 0.62        | 0.61        |
| 22-Hydroxydocosanoic acid (C22:0) | Complex lipids, fatty acids and related | 0.29         | 0.51        | 0.81        | 0.58         | 0.84        | 0.66        |
| 2-Hydroxybehenic acid (C22:0)     | Complex lipids, fatty acids and related | 0.40         | 0.26        | 0.34        | 0.36         | 0.56        | 0.46        |
| 2-Hydroxycerotic acid (C26:0)     | Complex lipids, fatty acids and related | 0.33         | 0.22        | 0.35        | 0.34         | 0.42        | 0.42        |
| 2-Hydroxynervonic acid (C24:1)    | Complex lipids, fatty acids and related | 0.36         | 0.25        | 0.36        | 0.27         | 0.51        | 0.43        |

|                                                       |                                         |      |      |      |      |      |      |
|-------------------------------------------------------|-----------------------------------------|------|------|------|------|------|------|
| 2-Hydroxypalmitic acid (C16:0)                        | Complex lipids, fatty acids and related | 0.43 | 0.30 | 0.39 | 0.42 | 0.71 | 0.61 |
| 2-Hydroxypentacosanoic acid (C25:0)                   | Complex lipids, fatty acids and related | 0.33 | 0.28 | 0.33 | 0.32 | 0.41 | 0.35 |
| 3-Hydroxybutyrate                                     | Energy metabolism and related           | 22.4 | 21.3 | 12.6 |      |      |      |
| 3-Hydroxyphenylacetic acid                            | Amino acids related                     | 5    | 5    | 6    | 2.67 | 2.51 | 2.90 |
| 3-Methylxanthine                                      | Miscellaneous                           | 0.06 | 0.08 | 0.09 | 0.06 | 0.07 | 0.04 |
|                                                       |                                         | 0.52 | 0.67 | 0.67 | 1.13 | 1.24 | 1.70 |
| 4-Hydroxyphenylacetic acid                            | Amino acids related                     |      |      |      |      | 10.3 |      |
| 4-Hydroxysphinganine (t18:0, Phytosphingosine), total | Complex lipids, fatty acids and related | 1.51 | 0.14 | 0.13 | 6.12 | 7    | 9.62 |
|                                                       |                                         | 4.36 | 2.70 | 1.64 | 3.75 | 6.81 | 3.11 |
|                                                       |                                         | 19.6 | 14.1 | 12.2 | 10.4 | 12.8 | 14.7 |
| 5-Oxoproline                                          | Amino acids related                     | 3    | 1    | 6    | 5    | 5    | 7    |
| 6-Hydroxynicotinic acid                               | Vitamins, cofactors and related         | 2.05 | 3.13 | 3.85 | 5.03 | 5.05 | 6.95 |
| Adenine                                               | Nucleobases and related                 | 0.65 | 0.25 | 0.33 | 0.27 | 0.22 | 0.37 |
|                                                       |                                         |      |      | 23.6 |      |      |      |
| Alanine                                               | Amino acids                             | 4.58 | 9.59 | 6    | 0.91 | 0.40 | 1.24 |
|                                                       |                                         | 126. | 20.8 | 36.9 | 295. | 235. | 660. |
| Allantoin                                             | Nucleobases and related                 | 77   | 2    | 0    | 35   | 87   | 66   |
|                                                       | Vitamins, cofactors and related         |      |      |      |      |      |      |
| alpha-Tocopherol                                      | Unknown                                 | 0.34 | 0.38 | 0.52 | 0.73 | 0.61 | 0.84 |
| alpha-Tocopherol                                      | Unknown                                 | 0.06 | 0.04 | 0.08 | 0.03 | 0.03 | 0.11 |
| alpha-Tocotrienol                                     | Unknown                                 | 0.06 | 0.09 | 0.15 | 0.05 | 0.05 | 0.13 |
|                                                       | Carbohydrates and related               | 36.5 |      |      |      |      |      |
| Arabinose                                             |                                         | 9    | 4.70 | 4.64 | 3.37 | 2.78 | 2.28 |
|                                                       |                                         | 11.4 |      | 10.4 |      |      |      |
| Arginine                                              | Amino acids                             | 9    | 8.33 | 3    | 2.53 | 1.10 | 2.03 |
|                                                       |                                         |      | 12.8 | 10.3 |      |      |      |
| Arginine                                              | Amino acids                             | 7.55 | 5    | 8    | 1.93 | 1.42 | 2.15 |
|                                                       | Complex lipids, fatty acids and related |      |      |      |      |      |      |
| Behenic acid (C22:0)                                  | Unknown                                 | 0.62 | 0.44 | 0.53 | 0.74 | 0.63 | 0.60 |
| beta-/gamma-Tocotrienol                               | Unknown                                 | 0.30 | 0.40 | 0.51 | 0.63 | 0.58 | 0.76 |
| beta-/gamma-Tocotrienol                               | Unknown                                 | 0.29 | 0.38 | 0.48 | 0.67 | 0.51 | 0.63 |
| beta-Amyrin TMS                                       | Unknown                                 | 0.69 | 0.63 | 0.68 | 0.80 | 0.92 | 0.70 |
| beta-Sitosterol, total                                | Miscellaneous                           | 2.30 | 2.69 | 2.62 | 2.88 | 3.21 | 2.75 |
| Biliverdin                                            | Unknown                                 | 0.38 | 0.08 | 0.40 | 0.37 | 0.17 | 0.26 |
| bis-Glycerol phosphate, polar fraction                | Miscellaneous                           | 2.72 | 2.21 | 1.26 | 2.92 | 1.80 | 1.74 |
| Campesterol, total                                    | Miscellaneous                           | 2.36 | 2.02 | 2.62 | 2.69 | 2.86 | 2.34 |
|                                                       | Complex lipids, fatty acids and related |      |      |      |      |      |      |
| Cerebronic acid (2-OH-C24:0)                          | Complex lipids, fatty acids and related | 0.41 | 0.33 | 0.37 | 0.39 | 0.53 | 0.44 |
|                                                       |                                         |      |      |      |      |      |      |
| Cerotic acid (C26:0)                                  | Complex lipids, fatty acids and related | 0.71 | 0.50 | 0.59 | 0.78 | 0.74 | 0.52 |
|                                                       |                                         |      |      |      |      |      |      |
| Cholestenol No 02                                     | Complex lipids, fatty acids and related | 0.53 | 0.39 | 0.48 | 0.69 | 0.55 | 0.64 |
|                                                       |                                         | 14.3 | 26.9 |      | 15.3 | 20.9 | 14.3 |
| Cholic acid                                           | Unknown                                 | 1    | 2    | 5.47 | 4    | 7    | 8    |
| Coenzyme Q10                                          | Unknown                                 | 0.55 | 0.44 | 0.36 | 0.51 | 0.79 | 0.52 |
| conjugated Linoleic acid (C18:trans[9,11]2)           | Complex lipids, fatty acids and related | 0.42 | 0.31 | 0.44 | 0.35 | 0.59 | 0.61 |
| Cortisol (lipid)                                      | Unknown                                 | 0.40 | 0.30 | 0.33 | 0.65 | 0.49 | 0.68 |
|                                                       |                                         | 159. | 92.1 | 129. | 132. | 104. | 94.5 |
| Creatinine                                            | Amino acids related                     | 09   | 6    | 29   | 71   | 82   | 4    |

|                                    |                                         |        |        |        |        |        |        |
|------------------------------------|-----------------------------------------|--------|--------|--------|--------|--------|--------|
| Creatinine                         | Unknown                                 | 124.16 | 192.72 | 363.87 | 230.67 | 168.08 | 281.58 |
| Cysteine                           | Amino acids                             | 7.78   | 5.87   | 6.38   | 10.9   | 3      | 12.0   |
| Cytosine                           | Nucleobases and related                 | 8.35   | 7.28   | 10.4   | 3.71   | 3.95   | 4.19   |
| Dehydroalanine                     | Amino acids related                     | 8.23   | 5.28   | 4.64   | 7.97   | 5.45   | 6.31   |
| Deoxycholic acid                   | Complex lipids, fatty acids and related | 0.21   | 0.14   | 0.25   | 0.10   | 0.12   | 0.11   |
| Deoxycholic acid                   | Unknown                                 | 0.01   | 0.00   | 0.01   | 0.01   | 0.00   | 0.00   |
| Eicoasenoic acid (C20:cis[11]1)    | Complex lipids, fatty acids and related | 0.44   | 0.44   | 0.60   | 0.63   | 0.53   | 0.69   |
| Eicosadienoic acid (C20:2) No 01   | Complex lipids, fatty acids and related | 0.22   | 0.23   | 0.20   | 0.21   | 0.30   | 0.26   |
| Eicosadienoic acid (C20:2) No 02   | Complex lipids, fatty acids and related | 0.20   | 0.23   | 0.20   | 0.25   | 0.18   | 0.23   |
| Eicosaenoic acid (C20:1) No 02     | Complex lipids, fatty acids and related | 0.47   | 0.23   | 0.30   | 0.48   | 0.63   | 0.34   |
| Eicosanoic acid (C20:0)            | Complex lipids, fatty acids and related | 0.58   | 0.40   | 0.55   | 0.77   | 0.55   | 0.56   |
| epsilon-Acetyllysine               | Unknown                                 | 4.65   | 6.17   | 5.44   | 11.1   | 6      | 7.59   |
| erythro-Dihydrosphingosine (d18:0) | Complex lipids, fatty acids and related | 0.21   | 0.11   | 0.15   | 0.15   | 0.24   | 0.21   |
| Ethanolamine                       | Miscellaneous                           | 1.09   | 0.55   | 0.57   | 0.80   | 0.59   | 0.61   |
| Fucose                             | Carbohydrates and related               | 31.7   | 35.3   | 15.5   | 4.27   | 5.43   | 3.51   |
| Fucosterol, total                  | Miscellaneous                           | 5      | 9      | 4      | 2.74   | 2.27   | 2.25   |
| Fumarate                           | Energy metabolism and related           | 2.02   | 1.53   | 2.11   | 4.29   | 3.18   | 4.18   |
| Galactose, lipid fraction          | Complex lipids, fatty acids and related | 4.74   | 5.10   | 4.74   | 1.43   | 1.81   | 1.71   |
| gamma-Tocopherol                   | Vitamins, cofactors and related         | 1.73   | 1.70   | 1.19   | 0.44   | 0.50   | 0.46   |
| gamma-Tocopherol                   | Unknown                                 | 0.34   | 0.30   | 0.45   | 0.82   | 0.65   | 0.91   |
| Glucose-1-phosphate                | Carbohydrates and related               | 0.47   | 0.64   | 1.01   | 3.93   | 6.00   | 5.07   |
| Glucuronic acid                    | Carbohydrates and related               | 23.0   | 4.62   | 12.5   | 4.38   | 5.14   | 4.37   |
| Glutamate                          | Amino acids                             | 1      | 1      | 4      | 10.1   | 16.0   | 6      |
| Glutamate                          | Unknown                                 | 1788   | 23.4   | 296.   | 7.07   | 7.42   | 3.38   |
| Glutamic acid 2TMS ME (lipid)      | Unknown                                 | .81    | 1      | 33     | 1.80   | 1.64   | 2.64   |
| Glutamine                          | Amino acids                             | 10.1   | 0      | 8.07   | 5.82   | 3.35   | 4.46   |
| Glutarate                          | Amino acids related                     | 0      | 2.79   | 4.57   | 0.53   | 0.51   | 0.53   |
| Glycerol phosphate, lipid fraction | Complex lipids, fatty acids and related | 0.24   | 0.25   | 0.20   | 0.49   | 0.49   | 0.48   |
| Glycerol, polar fraction           | Complex lipids, fatty acids and related | 0.46   | 0.47   | 0.23   | 1.07   | 0.93   | 1.65   |
| Glycine                            | Amino acids                             | 3.04   | 7.56   | 5.14   | 6.97   | 1.80   | 3.26   |
| Glycine, lipid fraction            | Miscellaneous                           | 29.0   | 39.8   | 48.0   | 0.80   | 0.67   | 0.68   |
| Glycine, lipid fraction            | Miscellaneous                           | 3      | 6      | 1      | 0.52   | 0.57   | 0.56   |
| Heneicosanoic acid (C21:0)         | Complex lipids, fatty acids and related | 0.47   | 0.55   | 0.53   | 0.46   | 0.47   | 0.42   |

|                                    |                                         |      |      |      |      |      |      |
|------------------------------------|-----------------------------------------|------|------|------|------|------|------|
| Heptacosanoic acid (C27:0)         | Complex lipids, fatty acids and related | 0.62 | 0.44 | 0.73 | 0.75 | 0.66 | 0.56 |
| Heptadecanoic acid (C17:0)         | Complex lipids, fatty acids and related | 0.33 | 0.20 | 0.28 | 0.32 | 0.24 | 0.34 |
| Hexadecanol                        | Complex lipids, fatty acids and related | 0.06 | 0.05 | 0.12 | 0.04 | 0.23 | 0.15 |
| Homoserine                         | Amino acids related                     | 1.73 | 2.76 | 4.43 | 0.57 | 0.82 | 0.72 |
| Hyodeoxycholic acid                | Unknown                                 | 0.01 | 0.00 | 0.01 | 0.01 | 0.00 | 0.01 |
| Hyodeoxycholic acid                | Complex lipids, fatty acids and related | 0.11 | 0.10 | 0.26 | 0.09 | 0.06 | 0.08 |
| Hypoxanthine                       | Nucleobases and related                 | 51.9 | 39.2 | 21.5 |      |      |      |
|                                    |                                         | 6    | 4    | 0    | 3.36 | 2.51 | 3.04 |
|                                    |                                         |      |      |      |      | 12.5 | 30.2 |
| Indole-3-acetic acid               | Amino acids related                     | 0.17 | 0.21 | 0.32 | 6.64 | 0    | 5    |
| Inosine                            | Nucleobases and related                 | 3.23 | 3.81 | 3.13 | 4.10 | 7.69 | 8.54 |
| isoLCA                             | Unknown                                 | 0.01 | 0.00 | 0.00 | 0.00 | 0.00 | 0.01 |
|                                    |                                         | 72.1 | 64.8 | 127. |      |      |      |
| Isoleucine                         | Amino acids                             | 4    | 2    | 40   | 0.68 | 0.46 | 0.83 |
|                                    | Complex lipids, fatty acids and related |      |      |      |      |      |      |
| Isopalmitic acid (C16:0)           |                                         | 0.26 | 0.18 | 0.21 | 0.23 | 0.31 | 0.23 |
| Kynurenic acid                     | Unknown                                 | 3.05 | 0.90 | 2.15 | 5.06 | 4.06 | 6.87 |
|                                    | Carbohydrates and related               |      | 23.1 |      |      |      |      |
| Lactose                            |                                         | 9.76 | 8    | 3.01 | 1.09 | 0.75 | 1.49 |
|                                    |                                         | 63.3 | 58.7 | 121. |      |      |      |
| Leucine                            | Amino acids                             | 1    | 9    | 57   | 0.43 | 0.31 | 0.63 |
|                                    | Complex lipids, fatty acids and related |      |      |      |      |      |      |
| Lignoceric acid (C24:0)            |                                         | 0.84 | 0.42 | 0.55 | 0.67 | 0.63 | 0.60 |
|                                    | Complex lipids, fatty acids and related |      |      |      |      |      |      |
| Linoleic acid (C18:cis[9,12]2)     |                                         | 2.62 | 2.94 | 3.85 | 3.50 | 4.09 | 3.57 |
|                                    | Complex lipids, fatty acids and related |      |      |      |      |      |      |
| Linolenic acid (C18:cis[9,12,15]3) |                                         | 2.89 | 4.09 | 4.18 | 3.77 | 6.02 | 3.99 |
| Lithocholic acid                   | Unknown                                 | 0.02 | 0.02 | 0.02 | 0.02 | 0.02 | 0.02 |
|                                    |                                         | 37.0 | 33.3 | 19.8 | 12.4 |      | 23.1 |
| Lysine                             | Amino acids                             | 3    | 5    | 8    | 8    | 3.31 | 1    |
|                                    | Carbohydrates and related               | 34.5 |      |      |      |      |      |
| Lyxose                             |                                         | 0    | 5.17 | 4.50 | 2.59 | 2.08 | 0.89 |
|                                    | Carbohydrates and related               | 25.4 |      |      |      |      |      |
| Mannose                            |                                         | 3    | 4.69 | 7.05 | 4.44 | 4.51 | 6.15 |
|                                    | Carbohydrates and related               | 299. | 350. | 152. |      |      |      |
| myo-Inositol                       |                                         | 98   | 58   | 31   | 3.96 | 7.51 | 4.38 |
|                                    | Complex lipids, fatty acids and related |      |      |      |      |      |      |
| Myristic acid (C14:0)              |                                         | 0.22 | 0.22 | 0.23 | 0.34 | 0.32 | 0.38 |
| N2-Acetylhistidine                 | Unknown                                 | 4.06 | 5.24 | 4.73 | 1.94 | 0.89 | 1.33 |
|                                    |                                         |      |      | 16.5 |      |      |      |
| N-Acetyl-leucine                   | Unknown                                 | 4.32 | 9.27 | 2    | 4.43 | 3.05 | 8.96 |
|                                    | Complex lipids, fatty acids and related |      |      |      |      |      |      |
| Nervonic acid (C24:cis[15]1)       |                                         | 0.44 | 0.30 | 0.47 | 0.51 | 0.39 | 0.59 |
| Niacinamide (Nicotinamide)         | Unknown                                 | 0.34 | 0.26 | 0.16 | 0.61 | 0.76 | 0.40 |
| Norleucine                         | Miscellaneous                           | 0.44 | 0.19 | 0.51 | 0.44 | 0.15 | 0.38 |
|                                    | Complex lipids, fatty acids and related |      |      |      |      |      |      |
| Octadecadienoic acid No 01 (C18:2) |                                         | 0.49 | 0.38 | 0.40 | 0.41 | 0.70 | 0.67 |
|                                    | Complex lipids, fatty acids and related |      |      |      |      |      |      |
| Octadecanol                        |                                         | 0.06 | 0.06 | 0.15 | 0.08 | 0.53 | 0.23 |
|                                    | Complex lipids, fatty acids and related |      |      |      |      |      |      |
| Oleic acid (C18:cis[9]1)           |                                         | 0.10 | 0.06 | 0.14 | 0.09 | 0.12 | 0.34 |
| o-Muricholic Acid                  | Unknown                                 | 0.08 | 0.00 | 0.00 | 0.14 | 0.03 | 0.02 |

|                                                         |                                         |      |      |      |      |      |      |
|---------------------------------------------------------|-----------------------------------------|------|------|------|------|------|------|
| Ornithine                                               | Amino acids related                     | 42.2 | 49.1 | 32.0 | 3.16 | 1.15 | 1.73 |
| Palmitic acid (C16:0)                                   | Complex lipids, fatty acids and related | 2    | 2    | 8    |      |      |      |
| Pentacosanoic acid (C25:0)                              | Complex lipids, fatty acids and related | 0.46 | 0.52 | 0.63 | 0.54 | 0.68 | 0.64 |
| Pentadecanol                                            | Complex lipids, fatty acids and related | 0.60 | 0.34 | 0.57 | 0.58 | 0.55 | 0.51 |
| Phenylalanine                                           | Amino acids                             | 0.40 | 0.37 | 0.45 | 0.49 | 0.44 | 0.42 |
| Phenylalanine                                           | Unknown                                 | 81.1 | 87.3 | 96.4 | 1.74 | 0.91 | 1.30 |
| Phenylalanine                                           | Unknown                                 | 2    | 2    | 8    |      |      |      |
| Phenylalanine                                           | Unknown                                 | 59.9 | 45.6 | 52.3 | 2.08 | 0.93 | 1.92 |
| Phenylalanine                                           | Unknown                                 | 2    | 6    | 6    |      |      |      |
| Phenylalanine                                           | Unknown                                 | 79.3 | 46.3 | 68.3 | 1.25 | 0.83 | 1.15 |
| Phenylalanine                                           | Unknown                                 | 1    | 9    | 1    |      |      |      |
| Phenylalanine, lipid fraction                           | Miscellaneous                           | 76.9 | 39.3 | 63.4 | 0.95 | 0.56 | 1.24 |
| Phosphate, lipid fraction                               | Complex lipids, fatty acids and related | 2    | 6    | 6    | 0.78 | 0.67 | 0.56 |
| Phosphoenolpyruvate (PEP)                               | Energy metabolism and related           | 2.04 | 1.75 | 1.99 |      |      |      |
| Pipecolic acid                                          | Unknown                                 | 0.46 | 0.33 | 0.34 | 0.42 | 0.47 | 0.55 |
| plausible 2-Hydroxyarachidic acid (2-OH-C20:0) TMS ME   | Unknown                                 | 4.85 | 4.04 | 3.90 | 5.55 | 4.19 | 3.12 |
| plausible 2-Hydroxytricosanoic acid (2-OH-C23:0) TMS ME | Unknown                                 | 0.23 | 0.16 | 0.08 | 0.69 | 0.63 | 0.61 |
| plausible Heptadecanol TMS                              | Unknown                                 | 0.31 | 0.22 | 0.30 | 0.35 | 0.54 | 0.39 |
| plausible SM (d18:1, C16:0) Na-Addukt                   | Unknown                                 | 0.52 | 0.28 | 0.35 | 0.40 | 0.54 | 0.45 |
| Proline                                                 | Amino acids                             | 0.01 | 0.01 | 0.02 | 0.01 | 0.04 | 0.04 |
| Proline betaine                                         | Unknown                                 | 4.05 | 3.35 | 2.15 | 2.99 | 4.18 | 3.15 |
| putative 12-Methylmyristic acid TMS                     | Unknown                                 |      | 12.0 | 34.0 |      |      |      |
| putative Anhydroglucuronate 4TMS                        | Unknown                                 | 1.64 | 1    | 1    | 1.62 | 0.92 | 1.87 |
| putative Bis-(glycerol)-phosphate                       | Unknown                                 | 0.65 | 0.58 | 0.69 | 1.74 | 0.72 | 1.30 |
| putative Choline plasmalogen (C36:2)                    | Unknown                                 | 0.04 | 0.02 | 0.03 | 0.03 | NA   | 0.03 |
| putative Deoxycholyglycine deriv #1                     | Unknown                                 | 14.7 |      | 10.7 |      |      |      |
| putative Hydroxy-eicosan OTMS                           | Unknown                                 | 6    | 7.28 | 3    | 3.37 | 3.94 | 3.32 |
| putative Hyodeoxycholic acid 3TMS                       | Unknown                                 | 0.28 | 0.19 | 0.25 | 0.24 | 0.25 | 0.22 |
| putative Lithocholic acid OTMS ME                       | Unknown                                 | 5.36 | 2.95 | 3.16 | 2.97 | 2.55 | 2.06 |
| putative Tetracosenoic acid ME                          | Unknown                                 | 0.02 | 0.01 | 0.01 | 0.02 | 0.00 | 0.02 |
| Putrescine                                              | Miscellaneous                           | 0.26 | 0.17 | 0.28 | 0.30 | 0.40 | 0.30 |
| Pyruvate                                                | Energy metabolism and related           | 0.01 | 0.01 | 0.08 | 0.02 | 0.01 | 0.05 |
| scyllo-Inositol                                         | Carbohydrates and related               | 0.05 | 0.02 | 0.02 | 0.04 | 0.03 | 0.03 |
| Serine                                                  | Amino acids                             | 0.57 | 0.22 | 0.38 | 0.45 | 0.47 | 0.41 |
| Serine, lipid fraction                                  | Miscellaneous                           | 11.2 |      |      | 65.3 | 13.1 | 26.0 |
| Serine, lipid fraction                                  | Miscellaneous                           | 7    | 3.64 | 6.43 | 7    | 5    | 8    |
| Shikimic acid                                           | Miscellaneous                           | 3.69 | 2.98 | 3.57 | 2.93 | 2.30 | 2.59 |
| Stearic acid (C18:0)                                    | Complex lipids, fatty acids and related | 16.3 | 23.8 | 43.0 | 16.9 | 13.1 | 34.7 |
|                                                         |                                         | 3    | 7    | 4    | 5    | 8    | 2    |
|                                                         |                                         | 47.1 | 23.9 | 49.9 |      |      |      |
|                                                         |                                         | 9    | 8    | 5    | 1.25 | 0.82 | 1.07 |
|                                                         |                                         | 1.16 | 0.53 | 0.50 | 0.96 | 0.59 | 0.51 |
|                                                         |                                         | 1.06 | 0.51 | 0.59 | 0.82 | 0.59 | 0.52 |
|                                                         |                                         | 738. | 504. | 1196 | 1255 | 829. | 1575 |
|                                                         |                                         | 89   | 54   | .46  | .66  | 12   | .29  |
|                                                         |                                         | 0.35 | 0.30 | 0.44 | 0.37 | 0.35 | 0.46 |



|                              |                                         |      |      |      |      |      |      |
|------------------------------|-----------------------------------------|------|------|------|------|------|------|
| Stigmastanol, total          | Miscellaneous                           | 0.50 | 0.56 | 0.67 | 0.57 | 0.66 | 0.68 |
| Stigmasterol, total          | Miscellaneous                           | 1.69 | 1.42 | 2.09 | 2.02 | 1.71 | 1.87 |
|                              |                                         | 24.1 | 16.9 | 10.5 | 21.2 | 19.9 | 23.1 |
| Taurine                      | Unknown                                 | 8    | 3    | 1    | 5    | 3    | 7    |
|                              |                                         | 20.1 | 148. | 40.8 |      |      |      |
| Tauro-b-muricholic Acid      | Unknown                                 | 9    | 81   | 0    | 4.03 | 6.14 | 2.65 |
|                              |                                         | 74.2 | 81.2 | 34.2 |      | 11.3 |      |
| Taurocholic acid             | Unknown                                 | 4    | 8    | 4    | 6.05 | 0    | 5.20 |
|                              |                                         | 142. | 1738 | 129. | 20.8 | 85.1 | 43.3 |
| Taurocholic Acid 3-sulfate   | Unknown                                 | 02   | .70  | 59   | 3    | 1    | 8    |
|                              |                                         | 16.6 | 73.0 | 11.5 |      | 15.1 |      |
| Taurocholic acid sodium salt | Unknown                                 | 2    | 2    | 1    | 6.14 | 3    | 4.85 |
|                              | Complex lipids, fatty acids and related |      |      |      |      |      |      |
| Tetradecanol                 |                                         | 0.17 | 0.09 | 0.11 | 0.17 | 0.15 | 0.12 |
| Thiamine (Vitamin B1)        | Unknown                                 | 0.30 | 0.09 | 0.42 | 0.30 | 0.15 | 0.21 |
|                              |                                         | 45.8 | 50.8 | 87.0 |      |      |      |
| Threonine                    | Amino acids                             | 2    | 3    | 7    | 2.42 | 1.19 | 2.67 |
|                              |                                         | 22.3 | 112. | 134. |      |      |      |
| trans-4-Hydroxyproline       | Amino acids related                     | 0    | 85   | 93   | 3.42 | 2.43 | 1.78 |
| trans-Ferulic acid           | Miscellaneous                           | 6.56 | 7.27 | 9.78 | 8.31 | 7.20 | 7.57 |
|                              |                                         | 18.5 | 32.1 | 22.5 | 33.7 | 34.5 | 27.8 |
| trans-Sinapic acid           | Miscellaneous                           | 2    | 3    | 5    | 6    | 0    | 6    |
|                              | Complex lipids, fatty acids and related |      |      |      |      |      |      |
| Tricosanoic acid (C23:0)     |                                         | 0.55 | 0.34 | 0.44 | 0.54 | 0.54 | 0.50 |
|                              |                                         | 86.0 | 120. | 92.3 | 25.0 |      |      |
| Tryptophan                   | Amino acids                             | 5    | 14   | 6    | 1    | 2.39 | 8.98 |
|                              |                                         | 401. | 132. | 317. | 180. |      | 11.8 |
| Tyramine                     | Amino acids related                     | 80   | 62   | 71   | 74   | 9.83 | 0    |
| Tyrosine                     | Unknown                                 | 3.56 | 0.30 | 0.52 | 0.21 | 0.18 | 0.27 |
| Ubichinone-30 (Coenzyme Q6)  | Unknown                                 | 0.50 | 0.54 | 0.41 | 0.49 | 0.71 | 0.59 |
| Ubichinone-35 (Coenzyme Q7)  | Unknown                                 | 0.53 | 0.42 | 0.40 | 0.53 | 0.65 | 0.59 |
| Ubichinone-45 (Coenzyme Q9)  | Unknown                                 | 0.61 | 0.42 | 0.43 | 0.55 | 0.70 | 0.57 |
| Unknown lipid MB (828450473) | Unknown                                 | 4.78 | 2.90 | 2.80 | 3.19 | 3.02 | 2.22 |
| Unknown lipid MB (828450676) | Unknown                                 | 0.92 | 0.80 | 0.87 | 0.96 | 0.75 | 0.90 |
| Unknown lipid MB (828450834) | Unknown                                 | 0.45 | 0.29 | 0.33 | 0.49 | 0.73 | 0.73 |
| Unknown lipid MB (828451241) | Unknown                                 | 0.08 | 0.06 | 0.13 | 0.13 | 0.05 | 0.10 |
| Unknown lipid MB (828451316) | Unknown                                 | 0.38 | 0.34 | 0.46 | 2.01 | 2.47 | 2.47 |
| Unknown lipid MB (828451380) | Unknown                                 | 0.71 | 0.27 | 0.51 | 0.55 | 0.51 | 0.41 |
| Unknown lipid MB (828451443) | Unknown                                 | 0.60 | 0.43 | 0.55 | 0.76 | 0.67 | 0.74 |
| Unknown lipid MB (828451444) | Unknown                                 | 0.76 | 0.31 | 0.49 | 0.54 | 0.53 | 0.43 |
| Unknown lipid MB (828451445) | Unknown                                 | 0.26 | 0.22 | 0.27 | 0.30 | 0.29 | 0.35 |
| Unknown lipid MB (828451931) | Unknown                                 | 0.01 | 0.00 | 0.01 | 0.01 | 0.00 | 0.02 |
| Unknown lipid MB (828451933) | Unknown                                 | 0.06 | 0.06 | 0.10 | 0.14 | 0.06 | 0.09 |
| Unknown lipid MB (828451937) | Unknown                                 | 0.00 | 0.00 | 0.00 | 0.00 | 0.02 | 0.01 |
| Unknown lipid MB (828451940) | Unknown                                 | 0.00 | 0.00 | 0.00 | 0.00 | 0.01 | 0.01 |
| Unknown lipid MB (828452038) | Unknown                                 | 0.03 | 0.01 | 0.02 | 0.02 | 0.01 | 0.02 |
| Unknown lipid MB (828452040) | Unknown                                 | 0.37 | 0.17 | 0.43 | 0.14 | 0.17 | 0.21 |
| Unknown lipid MB (828452041) | Unknown                                 | 0.04 | 0.07 | 0.05 | 0.03 | 0.08 | 0.04 |
| Unknown lipid MB (828452042) | Unknown                                 | 0.01 | 0.00 | 0.00 | 0.00 | 0.00 | 0.00 |
| Unknown lipid MB (828452043) | Unknown                                 | 0.01 | 0.02 | 0.01 | 0.01 | 0.02 | 0.00 |
| Unknown lipid MB (828452044) | Unknown                                 | 0.61 | 0.33 | 0.44 | 0.53 | 0.59 | 0.44 |
| Unknown lipid MB (828452047) | Unknown                                 | 0.03 | 0.00 | 0.00 | 0.02 | 0.09 | 0.02 |
| Unknown lipid MB (828452048) | Unknown                                 | 1.09 | 0.42 | 0.55 | 0.72 | 0.88 | 0.49 |

|                                      |         |      |      |      |      |      |      |
|--------------------------------------|---------|------|------|------|------|------|------|
| Unknown lipid MB (828452053)         | Unknown | 0.58 | 0.51 | 0.69 | 0.67 | 0.64 | 0.64 |
| Unknown lipid MB (828452059)         | Unknown | 0.21 | 0.06 | 0.03 | 0.40 | 0.07 | 0.03 |
| Unknown lipid MB (828452060)         | Unknown | 0.01 | 0.00 | 0.00 | 0.01 | 0.00 | 0.00 |
| Unknown lipid MB ESI neg (858450013) | Unknown | 16.6 | 14.0 | 37.5 | 0.74 | 0.39 | 1.14 |
| Unknown lipid MB ESI neg (858450034) | Unknown | 0.34 | 0.16 | 0.17 | 1.01 | 0.52 | 0.89 |
| Unknown lipid MB ESI neg (858450047) | Unknown | 73.0 | 58.0 | 56.5 | 54.2 | 26.7 |      |
| Unknown lipid MB ESI neg (858450065) | Unknown | 6    | 6    | 0    | 5    | 9    | 6.91 |
| Unknown lipid MB ESI neg (858450068) | Unknown | 0.31 | 0.16 | 0.28 | 1.39 | 0.86 | 1.54 |
| Unknown lipid MB ESI neg (858450071) | Unknown | 0.42 | 0.36 | 0.31 | 0.48 | 0.60 | 0.77 |
| Unknown lipid MB ESI pos (848450056) | Unknown | 2.45 | 2.07 | 2.75 | 3.71 | 3.22 | 2.94 |
| Unknown lipid MB ESI pos (848450083) | Unknown | 5.57 | 3.80 | 4.60 | 5.63 | 4.95 | 4.79 |
| Unknown lipid MB ESI pos (848450084) | Unknown | 4.20 | 2.83 | 1.64 | 3.02 | 3.41 | 1.62 |
| Unknown lipid MB ESI pos (848450091) | Unknown | 2.51 | 3.10 | 2.14 | 2.04 | 2.99 | 2.46 |
| Unknown lipid MB ESI pos (848450092) | Unknown | 0.13 | 0.23 | 0.39 | 0.58 | 0.67 | 2.08 |
| Unknown lipid MB ESI pos (848450093) | Unknown | 0.33 | 0.18 | 0.25 | 0.34 | 0.27 | 0.28 |
| Unknown lipid MB ESI pos (848450096) | Unknown | 0.36 | 0.27 | 0.26 | 0.81 | 0.79 | 0.84 |
| Unknown lipid MB ESI pos (848450097) | Unknown | 2.12 | 2.16 | 2.13 | 2.95 | 3.05 | 2.15 |
| Unknown lipid MB ESI pos (848450100) | Unknown | 7.77 | 5.44 | 6.12 | 8.39 | 6.77 | 5.69 |
| Unknown lipid MB ESI pos (848450102) | Unknown | 4.45 | 3.95 | 3.29 | 3.66 | 5.95 | 3.82 |
| Unknown lipid MB ESI pos (848450103) | Unknown | 7.50 | 2.41 | 3.35 | 5.42 | 3.26 | 2.48 |
| Unknown lipid MB ESI pos (848450105) | Unknown | 6.23 | 3.76 | 3.00 | 5.19 | 3.47 | 2.37 |
| Unknown lipid MB ESI pos (848450106) | Unknown | 12.9 | 10.2 |      | 15.0 | 13.2 |      |
| Unknown lipid MB ESI pos (848450107) | Unknown | 8    | 9    | 6.82 | 0    | 3    | 7.67 |
| Unknown lipid MB ESI pos (848450108) | Unknown | 6.12 | 2.96 | 2.44 | 3.13 | 3.79 | 2.63 |
| Unknown lipid MB ESI pos (848450109) | Unknown | 2.30 | 1.48 | 1.75 | 1.35 | 2.12 | 1.72 |
| Unknown lipid MB ESI pos (848450110) | Unknown | 5.08 | 2.74 | 2.99 | 2.58 | 2.86 | 2.64 |
| Unknown lipid MB ESI pos (848450111) | Unknown | 3.15 | 2.05 | 2.63 | 1.98 | 2.46 | 1.99 |
| Unknown lipid MB ESI pos (848450113) | Unknown | 7.61 | 5.39 | 4.38 | 5.29 | 5.97 | 8.43 |
| Unknown lipid MB ESI pos (848450114) | Unknown | 1.50 | 2.75 | 2.58 | 2.09 | 3.08 | 3.30 |
| Unknown lipid MB ESI pos (848450116) | Unknown | 3.44 | 3.72 | 5.06 | 3.20 | 4.44 | 5.06 |
|                                      |         | 6.47 | 3.27 | 3.99 | 3.27 | 3.72 | 3.48 |
|                                      |         | 4.56 | 3.33 | 2.16 | 3.56 | 6.39 | 4.97 |

|                                         |         |      |      |      |      |      |      |
|-----------------------------------------|---------|------|------|------|------|------|------|
| Unknown lipid MB ESI pos<br>(848450129) | Unknown | 2.20 | 2.33 | 1.92 | 1.55 | 2.99 | 2.57 |
| Unknown lipid MB ESI pos<br>(848450131) | Unknown | 4.68 | 3.56 | 3.12 | 3.13 | 6.07 | 3.01 |
| Unknown lipid MB ESI pos<br>(848450132) | Unknown | 3.91 | 3.02 | 2.49 | 2.64 | 4.43 | 3.27 |
| Unknown lipid MB ESI pos<br>(848450138) | Unknown | 2.98 | 2.43 | 1.83 | 2.38 | 4.26 | 3.24 |
| Unknown lipid MB ESI pos<br>(848450139) | Unknown | 8.65 | 6.11 | 4.71 | 3.82 | 4.64 | 2.80 |
| Unknown lipid MB ESI pos<br>(848450142) | Unknown | 11.9 | 1    | 6.51 | 4.84 | 5.92 | 4.02 |
| Unknown lipid MB ESI pos<br>(848450144) | Unknown | 3.66 | 3.97 | 2.90 | 3.06 | 5.24 | 5.07 |
| Unknown lipid MB ESI pos<br>(848450146) | Unknown | 3.20 | 2.65 | 1.89 | 2.57 | 3.73 | 2.89 |
| Unknown lipid MB ESI pos<br>(848450148) | Unknown | 4.50 | 3.55 | 2.68 | 3.22 | 5.94 | 4.59 |
| Unknown lipid MB ESI pos<br>(848450152) | Unknown | 1.97 | 2.88 | 1.61 | 1.76 | 4.76 | 3.04 |
| Unknown lipid MB ESI pos<br>(848450154) | Unknown | 0.55 | 0.43 | 0.31 | 0.40 | 0.97 | 0.50 |
| Unknown lipid MB ESI pos<br>(848450155) | Unknown | 0.70 | 0.33 | 0.28 | 0.63 | 0.76 | 0.54 |
| Unknown lipid MB ESI pos<br>(848450196) | Unknown | 5.29 | 9.54 | 8.18 | 8.93 | 14.3 | 1    |
| Unknown lipid MB ESI pos<br>(848450201) | Unknown | 5.57 | 7.29 | 6.98 | 9.37 | 10.2 | 6    |
| Unknown lipid MB ESI pos<br>(848450202) | Unknown | 2.09 | 2.74 | 2.70 | 2.96 | 3.52 | 3.20 |
| Unknown lipid MB ESI pos<br>(848450204) | Unknown | 7.45 | 10.2 | 9    | 12.7 | 13.8 | 6    |
| Unknown lipid MB ESI pos<br>(848450205) | Unknown | 7.03 | 9.67 | 8.09 | 11.6 | 11.3 | 4    |
| Unknown lipid MB ESI pos<br>(848450206) | Unknown | 8.01 | 13.9 | 13.7 | 11.4 | 20.2 | 11.6 |
| Unknown lipid MB ESI pos<br>(848450207) | Unknown | 7.69 | 11.5 | 10.1 | 13.0 | 17.7 | 2    |
| Unknown lipid MB ESI pos<br>(848450208) | Unknown | 7.05 | 0    | 0    | 3    | 11.2 | 8.94 |
| Unknown lipid MB ESI pos<br>(848450209) | Unknown | 5.28 | 9.59 | 8.78 | 9.85 | 5    | 7.56 |
| Unknown lipid MB ESI pos<br>(848450210) | Unknown | 3.96 | 6.39 | 5.23 | 8.77 | 8.16 | 5.73 |
| Unknown lipid MB ESI pos<br>(848450212) | Unknown | 5.89 | 8.29 | 8.97 | 7.91 | 10.1 | 2    |
| Unknown lipid MB ESI pos<br>(848450213) | Unknown | 7.01 | 9.67 | 9.44 | 11.4 | 11.6 | 1    |
| Unknown lipid MB ESI pos<br>(848450214) | Unknown | 5.94 | 9.46 | 10.3 | 7    | 5    | 8.07 |
| Unknown lipid MB ESI pos<br>(848450215) | Unknown | 6.71 | 11.1 | 8    | 9.18 | 10.1 | 3    |
| Unknown lipid MB ESI pos<br>(848450216) | Unknown | 5.58 | 5    | 8.18 | 9.93 | 11.6 | 6    |
| Unknown lipid MB ESI pos<br>(848450218) | Unknown | 5.65 | 9.70 | 8.47 | 9.45 | 10.6 | 9    |
| Unknown lipid MB ESI pos<br>(848450219) | Unknown | 4.62 | 6.93 | 6.71 | 7.88 | 10.0 | 5    |
|                                         |         |      |      |      |      |      | 7.73 |
|                                         |         |      |      |      |      |      | 7.04 |

|                              |         |      |      |      |      |      |      |
|------------------------------|---------|------|------|------|------|------|------|
| Unknown polar MB (838450146) | Unknown | 5.09 | 3.02 | 2.11 | 2.07 | 1.69 | 1.09 |
| Unknown polar MB (838450528) | Unknown | 0.60 | 0.25 | 0.13 | 1.00 | 1.33 | 1.21 |
| Unknown polar MB (838450590) | Unknown | 0.46 | 0.19 | 0.71 | 0.52 | 0.16 | 0.42 |
|                              |         |      |      |      | 12.0 |      | 12.6 |
| Unknown polar MB (838450621) | Unknown | 6.68 | 7.46 | 7.28 | 7    | 8.90 | 1    |
| Unknown polar MB (838450692) | Unknown | 0.19 | 0.24 | 0.18 | 0.11 | 0.23 | 0.20 |
| Unknown polar MB (838450761) | Unknown | 3.89 | 2.30 | 1.75 | 1.92 | 2.61 | 2.23 |
| Unknown polar MB (838450816) | Unknown | 0.01 | 0.00 | 0.01 | 0.01 | 0.00 | 0.01 |
| Unknown polar MB (838450990) | Unknown | 1.53 | 1.47 | 1.51 | 1.16 | 1.05 | 1.05 |
| Unknown polar MB (838451614) | Unknown | 0.04 | 0.08 | 0.03 | 0.02 | 0.16 | 0.04 |
| Unknown polar MB (838452021) | Unknown | 0.59 | 0.38 | 0.49 | 0.41 | 0.46 | 0.52 |
| Unknown polar MB (838452022) | Unknown | 2.60 | 2.14 | 1.75 | 2.24 | 1.62 | 2.06 |
| Unknown polar MB (838452079) | Unknown | 7.37 | 1.97 | 2.83 | 2.98 | 1.95 | 2.13 |
| Unknown polar MB (838452178) | Unknown | 0.07 | 0.10 | 0.18 | 0.07 | 0.16 | 0.34 |
| Unknown polar MB (838452196) | Unknown | 3.83 | 1.85 | 2.34 | 2.32 | 1.44 | 1.90 |
|                              |         | 10.4 |      |      |      |      |      |
| Unknown polar MB (838452804) | Unknown | 8    | 2.37 | 4.70 | 2.91 | 2.49 | 1.31 |
| Unknown polar MB (838452997) | Unknown | 0.32 | 0.55 | 0.40 | 0.34 | 0.59 | 0.42 |
| Unknown polar MB (838452998) | Unknown | 1.86 | 0.20 | 0.19 | 1.04 | 0.40 | 0.80 |
| Unknown polar MB (838453005) | Unknown | 0.20 | 0.27 | 0.26 | 0.09 | 0.09 | 0.09 |
| Unknown polar MB (838453006) | Unknown | 0.17 | 0.24 | 0.21 | 0.09 | 0.30 | 0.24 |
| Unknown polar MB (838453008) | Unknown | 0.18 | 0.32 | 0.26 | 1.19 | 0.98 | 1.43 |
| Unknown polar MB (838453009) | Unknown | 0.02 | 0.03 | 0.02 | 0.03 | 0.04 | 0.02 |
| Unknown polar MB (838453011) | Unknown | 0.51 | 0.69 | 0.36 | 0.74 | 1.06 | 0.65 |
|                              |         | 26.4 | 24.3 | 11.7 | 215. | 83.2 | 83.0 |
| Unknown polar MB (838453012) | Unknown | 2    | 3    | 2    | 16   | 7    | 4    |
| Unknown polar MB (838453014) | Unknown | 0.21 | 0.32 | 0.61 | 0.76 | 0.67 | 1.06 |
| Unknown polar MB (838453015) | Unknown | 0.18 | 0.11 | 0.18 | 0.19 | 0.12 | 0.17 |
| Unknown polar MB (838453016) | Unknown | 0.33 | 0.54 | 0.53 | 1.27 | 1.23 | 2.00 |
| Unknown polar MB (838453017) | Unknown | 0.11 | 0.05 | 0.10 | 0.08 | 0.14 | 0.09 |
| Unknown polar MB (838453018) | Unknown | 0.07 | 0.11 | 0.17 | 0.07 | 0.17 | 0.12 |
| Unknown polar MB (838453019) | Unknown | 0.10 | 0.06 | 0.03 | 0.08 | 0.08 | 0.02 |
| Unknown polar MB (838453026) | Unknown | 0.24 | 0.09 | 0.17 | 0.19 | 0.28 | 0.40 |
| Unknown polar MB (838453028) | Unknown | 0.18 | 0.08 | 0.07 | 0.11 | 0.07 | 0.06 |
| Unknown polar MB (838453033) | Unknown | 0.14 | 0.06 | 0.06 | 0.05 | 0.07 | 0.04 |
| Unknown polar MB (838453036) | Unknown | 0.07 | 0.03 | 0.02 | 0.06 | 0.06 | 0.04 |
| Unknown polar MB (838453040) | Unknown | 0.05 | 0.03 | 0.03 | 0.03 | 0.06 | 0.03 |
| Unknown polar MB (838453041) | Unknown | 0.07 | 0.11 | 0.11 | 0.10 | 0.08 | 0.18 |
| Unknown polar MB (838453044) | Unknown | 0.36 | 0.30 | 0.36 | 0.43 | 0.39 | 0.40 |
| Unknown polar MB (838453047) | Unknown | 0.20 | 0.04 | 0.04 | 0.11 | 0.10 | 0.05 |
| Unknown polar MB (838453048) | Unknown | 0.12 | 0.11 | 0.07 | 0.15 | 0.09 | 0.11 |
| Unknown polar MB (838453051) | Unknown | 0.28 | 0.51 | 0.50 | 0.34 | 0.65 | 0.75 |
| Unknown polar MB (838453052) | Unknown | 0.28 | 0.15 | 0.25 | 0.17 | 0.17 | 0.12 |
| Unknown polar MB (838453053) | Unknown | 0.32 | 0.16 | 0.33 | 0.17 | 0.14 | 0.13 |
| Unknown polar MB (838453055) | Unknown | 0.04 | 0.03 | 0.02 | 0.03 | 0.05 | 0.02 |
| Unknown polar MB (838453056) | Unknown | 0.38 | 0.29 | 0.26 | 0.27 | 0.19 | 0.28 |
| Unknown polar MB (838453057) | Unknown | 0.44 | 0.25 | 0.38 | 0.25 | 0.20 | 0.16 |
| Unknown polar MB (838453058) | Unknown | 0.56 | 0.17 | 0.21 | 0.37 | 0.11 | 0.12 |
| Unknown polar MB (838453059) | Unknown | 2.66 | 2.95 | 3.19 | 2.35 | 3.17 | 2.57 |
| Unknown polar MB (838453062) | Unknown | 0.30 | 0.43 | 0.49 | 0.43 | 0.62 | 0.57 |

|                                      |                           |      |      |      |      |      |      |      |      |      |
|--------------------------------------|---------------------------|------|------|------|------|------|------|------|------|------|
| Unknown polar MB (838453063)         | Unknown                   | 0.30 | 0.03 | 0.03 | 0.13 | 0.03 | 0.05 |      |      |      |
| Unknown polar MB (838453066)         | Unknown                   | 0.01 | 0.01 | 0.01 | 0.01 | 0.00 | 0.01 |      |      |      |
| Unknown polar MB (838453067)         | Unknown                   | 3.19 | 2.27 | 3.10 | 4.49 | 2.27 | 3.68 |      |      |      |
| Unknown polar MB ESI pos (868450034) | Unknown                   | 3.53 | 4.44 | 3.47 | 0.52 | 0.88 | 0.68 |      |      |      |
| Unknown polar MB ESI pos (868450040) | Unknown                   | 3.29 | 4.00 | 4.83 | 1.97 | 0.95 | 1.49 |      |      |      |
| Uric acid                            | Nucleobases and related   | 10.5 | 2    | 8.98 | 7.47 | 0.35 | 1.23 | 0.72 |      |      |
| Valine                               | Amino acids               | 50.7 | 1    | 53.5 | 93.3 | 0.87 | 0.44 | 0.82 |      |      |
| Valine TMS ME                        | Unknown                   | 2.68 | 3.55 | 4.64 | 0.65 | 0.70 | 0.69 |      |      |      |
| Valine, lipid fraction               | Miscellaneous             | 3.25 | 3.07 | 3.89 | 0.94 | 0.67 | 0.62 |      |      |      |
| Xanthine                             | Nucleobases and related   | 88.4 | 92.2 | 74.9 | 4    | 9    | 5    | 0.66 | 0.55 | 2.40 |
| Xanthurenic acid                     | Amino acids related       | 0.08 | 0.12 | 0.05 | 0.05 | 0.07 | 0.11 |      |      |      |
| Xylose                               | Carbohydrates and related | 11.5 | 23.6 | 0    | 7    | 4.83 | 4.22 | 3.29 | 2.14 |      |

**Table S5:** Summarized table indicating the trend of significant alterations in plasma biomarkers including hippuric acid and indole derivatives in samples from animals treated with antibiotics (HD group only) belonging to different classes. Yellow boxes indicate a significant increase and red box indicates a significant decrease in the fold change levels of respective plasma metabolites at p-value<0.1.

| Plasma biomarkers             | Aminoglycosides |            |          | Lincosamides |            | Fluoroquinolone |              |              | Carbapenems |           |
|-------------------------------|-----------------|------------|----------|--------------|------------|-----------------|--------------|--------------|-------------|-----------|
|                               | Tobramycin      | Gentamicin | Neomycin | Clindamycin  | Lincomycin | Sparfloxacin    | Moxifloxacin | Levofloxacin | Meropenem   | Doripenem |
| 3-Indoxylsulfate (3IS)        | ↓↓              | NS         | NS       | ↓↓           | ↓          | NS              | ↓↓           | NS           | ↓↓          | ↓↓        |
| Hippuric acid (HA)            | ↓↓              | ↓↓         | ↓↓       | ↓↓           | ↓          | NS              | ↓↓           | ↓↓           | ↓↓          | ↓↓        |
| Indole-3-acetic acid (IAA)    | ↓↓              | NS         | ↓        | NS           | NS         | ↓↓              | ↓↓           | ↓↓           | ↑           | ↓         |
| Indole-3-propionic acid (IPA) | ↓↓              | NA         | ↓↓       | NA           | NA         | NA              | NS           | NS           | NS          | ↓         |

\*NS, non-significant; NA, not applicable
